# Supplementary material
Source: ML conference proceedings conference paper supplement (https://proceedings.neurips.cc/paper_files/paper/2019/hash/13d4635deccc230c944e4ff6e03404b5-Abstract.html)
Supplement: Supplementary file [file 13d4635deccc230c944e4ff6e03404b5-Supplemental.zip]

---

# Statistical-Computational Tradeoffs in High-Dimensional Single Index Models

---

Anonymous Author(s)

Affiliation

Address

email

## Abstract

1 We study the statistical-computational tradeoffs in a high dimensional single in-  
2 dex model  $Y = f(X^\top \beta^*) + \epsilon$ , where  $f$  is unknown,  $X$  is a Gaussian vector  
3 and  $\beta^*$  is  $s$ -sparse with unit norm. When  $\text{Cov}(Y, X^\top \beta) \neq 0$ , [43] shows that  
4 the direction and support of  $\beta^*$  can be recovered using a generalized version of  
5 Lasso. In this paper, we investigate the case when this critical assumption fails  
6 to hold, where the problem becomes considerably harder. Using the statistical  
7 query model to characterize the computational cost of an algorithm, we show that  
8 when  $\text{Cov}(Y, X^\top \beta) = 0$  and  $\text{Cov}(Y, (X^\top \beta)^2) > 0$ , no computationally tractable  
9 algorithms can achieve the information-theoretic limit of the minimax risk. This  
10 implies that one must pay an extra computational cost for the nonlinearity involved  
11 in the model.

## 12 1 Introduction

13 A single index model (SIM) specifies that the response  $Y$  and the covariate  $X$  satisfy  $Y = f(X^\top \beta^*) +$   
14  $\epsilon$ , where  $\beta^* \in \mathbb{R}^d$  is an unknown parameter,  $f: \mathbb{R} \rightarrow \mathbb{R}$  is an unknown link function, and  $\epsilon \in \mathbb{R}$  is  
15 a random noise. This model extends linear regression by incorporating the unknown link function,  
16 offers additional modeling flexibility and robustness to model misspecification. SIMs are extensively  
17 studied in the literature, with wide applications such as time-series [17], survival analysis [35], and  
18 quantile regression [55].

19 Given  $n$  i.i.d. observations of this model, the primary focus is to estimate the parametric component  
20  $\beta^*$  without knowing the exact form of  $f$ . When  $\beta^*$  is estimated accurately,  $f$  can be fitted via  
21 univariate nonparametric regression. Recently, there is growing research interest in recovering  $\beta^*$  in  
22 the high-dimensional setting where the dimensionality  $d$  is much larger than the sample size  $n$  and  
23  $\beta^*$  is sparse. When  $Y$  and  $X^\top \beta^*$  has nonzero correlation, [43, 44] propose to estimate  $\beta^*$  by fitting  
24 an  $\ell_1$ -regularized linear model, i.e., Lasso [49], directly using  $Y$  and  $X$ . More interestingly, they also  
25 establish similar theoretical guarantees as those for the linear model. Specifically, they show that the  
26 Lasso estimator is consistent as long as the sample size is of the order  $s \log d$ , where  $s$  is the number  
27 of nonzero entries in  $\beta^*$ . Moreover, this sample complexity result is known to be optimal in the  
28 sense that it attains the information-theoretical lower bound [46, 52], and the proposed estimator can  
29 be obtained efficiently using convex optimization. However, the Lasso approach fails when  $Y$  and  
30  $X^\top \beta^*$  are uncorrelated, which is the case when the link function is symmetric. A prominent example  
31 is phase retrieval [10, 11], where  $f$  is known to be either the absolute value or quadratic function.  
32 For sparse phase retrieval,  $s \log d$  sample complexity is only attained by the empirical risk minimizer  
33 [33], which searches over all  $\binom{d}{s}$  possible support sets of  $\beta$ , and is thus computationally intractable.

In addition, various efficient estimators are proposed based on convex relaxation or projected gradient descent [8, 13], whose consistency is only shown when the sample size is of the order  $s^2 \log d$ . Thus, there seems an interesting tradeoff between the statistical optimality and computational efficiency, i.e., there is a gap between the optimal statistical performance achieved by the family of computationally efficient estimators and that attained by all possible estimators. In sparse phase retrieval, such a gap is conjectured to be fundamental [8] and is also observed in SIMs where  $f$  is symmetric [42, 47, 61].

This intriguing phenomenon motivates the following two questions: (i) How does the unknown link function affect the statistical and computational aspects of learning SIMs in high dimensions? (ii) Are the gap observed in symmetric links intrinsic and cannot be eliminated by more sophisticated algorithm design and analysis?

For the first question, we introduce the notions of first- and second-order Stein’s associations which characterize the dependence between  $Y$  and  $X^\top \beta^*$  two different orders. We differentiate two types of link functions: (i)  $f$  with nonzero first-order Stein’s association and (ii)  $f$  with zero first-order and nonzero Stein’s associations. These two classes capture the functions considered in [43, 44] and [42, 47, 61] respectively. More importantly, we establish the statistical-computational barrier under an oracle computational model [16, 18, 19, 53], which is an abstraction of computations made by algorithms that interact with data. Specifically, we study the signal detection problem where the link function is defined as a continuous interpolation of two link functions of different types. We establish information-theoretical and computational lower bounds for the minimum signal strength required for successful detection and also propose algorithms that yield matching upper bounds. Moreover, we characterize the gap between signal strengths for learning SIMs under limited and unlimited computational budgets and display the evolution of this gap as the link function transits from one type to the other.

**Main Contribution.** Our contribution is three-fold. First, we introduce the first- and second-order Stein’s associations, which bring a general characterization of the link functions considered in the literature. Second, for the detection problem, we establish nearly tight information-theoretical and computational lower bounds under the framework of oracle model, which exhibit the statistical price paid for achieving computational efficiency in learning SIMs. Third, we also construct algorithms which yield matching upper bounds. Our results also imply a similar computational barrier for parameter estimation, thus providing a positive answer to the open problem raised in [8].

**Related Work.** There is a huge body of literature on single-index models in the low-dimensional setting. See, for example, [25, 27, 29, 39] and the references therein. For high-dimensional SIMs, when  $Y$  and  $X^\top \beta^*$  has a nonzero correlation, [22, 23, 26, 40, 41, 43, 44, 57] study the statistical rates of Lasso-type estimators, which are shown to achieve both statistical accuracy and computational efficiency. In contrast, [42, 48, 60, 61] study SIMs which are generalizations of sparse phase retrieval [8].

In addition, the statistical query model is proposed by [30] and further extended by [15, 18–20] for studying the computational complexity of planted clique, random satisfiability problems, stochastic convex optimization, and Gaussian mixture model. In addition, based on a slightly modified version, [16, 34, 53, 62] establish the statistical-computational tradeoffs in statistical problems including sparse PCA, high-dimensional mixture models, weakly supervised learning, and graph structure inference. Among them, our work is mostly related to [16], which validates the computational barrier in phase retrieval with absolute value link function by drawing the connection to mixture of regression models. In comparison, we tackle SIMs directly, which takes phase retrieval as a particular case. More importantly, by interpolating the two sub-classes of SIMs, we obtain the full spectrum of phase transitions, which shed new light on the open problem raised in [8].

Furthermore, there is a massive body of literature on understanding the computational barriers of statistical models. Besides our oracle model approach, there are two other popular means of attacking such problems. The first one is based on polynomial-time reductions from the conjectured computationally challenging problems to statistical problems of interest. See, e.g., [3–7, 9, 12, 21, 24, 37, 56] and the references therein. Second method constructs a sequence of sum-of-squares convex relaxations that are increasingly tighter based on semidefinite programming [1, 2, 14, 28, 31, 36, 38, 45, 54]. Although this approach is free of hardness conjectures, their computational barriers only hold for the restricted family of convex relaxation algorithms.

## 88 2 Background

89 In this section, we first introduce the single index model and the associated signal detection problem.  
 90 We then introduce the statistical query model, which quantifies the computational cost of an algorithm  
 91 that interacts with data and is later used to establish the main results.

### 92 2.1 Statistical Model

93 We consider the single index model

$$Y = f(X^\top \beta^*) + \epsilon, \quad (2.1)$$

94 where  $X \sim N(0, I_d)$  is the covariate,  $Y$  is the response,  $\beta^* \in \mathbb{R}^d$  is the unknown parameter of  
 95 interest,  $\epsilon \sim N(0, \sigma^2)$  is the noise, and  $f: \mathbb{R} \rightarrow \mathbb{R}$  is the unknown link function. Given  $n$  independent  
 96 realizations  $\{z_i = (y_i, x_i)\}_{i \in [n]}$  of this model, our goal is to estimate  $\beta^*$  under the assumption that  
 97  $\beta^*$  is  $s$ -sparse,  $s \ll n$ , and  $d \gg n$ .

98 [43] estimate  $\beta^*$  by exploiting the covariance structure  $\text{Cov}(Y, X^\top \beta^*)$ . When such a structure  
 99 is unavailable, that is,  $\text{Cov}(Y, X^\top \beta^*) = 0$ , [42, 61] estimate  $\beta^*$  by exploiting  $\text{Cov}[Y, (X^\top \beta^*)^2]$ .  
 100 However, the resulting estimators require a higher sample complexity than the estimators that are  
 101 based on  $\text{Cov}(Y, X^\top \beta^*)$ . To understand such a gap in sample complexity, we consider more general  
 102 settings under a unified framework. The key of this framework is the following Stein's identities  
 103 [58, 59]. Let  $X \sim N(0, I_d)$  be the standard Gaussian distribution and  $Y = h(X)$ . If the expectation  
 104  $\mathbb{E}[\nabla h(X)]$  exists, the first-order Stein's identity takes the form

$$\mathbb{E}[\nabla h(X)] = \mathbb{E}[YX]. \quad (2.2)$$

105 Let  $Y = h(X)$ , where  $h$  is twice differentiable. If the expectation  $\mathbb{E}[\nabla^2 h(X)]$  exists, the second-order  
 106 Stein's identity takes the form

$$\mathbb{E}[\nabla^2 h(X)] = \mathbb{E}[Y \cdot (XX^\top - I_d)]. \quad (2.3)$$

107 The above identities show that the covariance structures  $\text{Cov}(Y, X^\top \beta^*)$  and  $\text{Cov}[Y, (X^\top \beta^*)^2]$  are piv-  
 108 otal in the estimation of the model defined in (2.1). Following from (2.2) with  $h(X) = f(X^\top \beta^*) + \epsilon$ ,  
 109 it holds that  $\mathbb{E}[YX] = \mathbb{E}[f'(X^\top \beta^*) \cdot \epsilon] \cdot \beta^*$ , where we denote by  $f'$  the derivative of  $f$  with respect  
 110 to the first coordinate. In other words,  $\mathbb{E}[YX]$  recovers  $\beta^*$  up to a scaling under the assumption that  
 111  $\text{Cov}(Y, X^\top \beta^*) \neq 0$ . Meanwhile, following from (2.3) with  $h(X) = f(X^\top \beta^*) + \epsilon$ , it holds that

$$\mathbb{E}[Y \cdot XX^\top] = \mathbb{E}[f''(X^\top \beta^*) \cdot \epsilon] \cdot \beta^* \beta^{*\top} + \mathbb{E}[Y] \cdot I_d.$$

112 In other words,  $\beta^*$  is the leading eigenvector of  $\mathbb{E}[Y \cdot XX^\top]$  under the assumption that  
 113  $\text{Cov}[Y, (X^\top \beta^*)^2] > 0$ . We define the following covariance structures, which play important roles in  
 114 the estimation of  $\beta^*$  in the model in (2.1) with unknown link function  $f$ .

115 **Definition 2.1** (First-order and second-order Stein's associations). Let  $\psi$  be a twice differentiable  
 116 transformation from  $\mathbb{R}$  to  $\mathbb{R}$  and  $Y$  be the response of  $X$  under the model in (2.1). We define the first-  
 117 and second-order Stein's association between  $Y$  and  $X^\top \beta^*$  as

$$S_1(Y) = \text{Cov}(Y, X^\top \beta^*), \quad S_2(Y, \psi) = \text{Cov}[\psi(Y), (X^\top \beta^*)^2],$$

118 respectively, where  $\psi$  is called the marginal transformation.

119 In the following, we introduce classes of link functions of interest. We consider the following two  
 120 classes of link functions,

$$\begin{aligned} \mathcal{C}_1 &= \{f : \text{Cov}(f(X^\top \beta^*), X^\top \beta^*) / \|\beta^*\|_2^2 = 1\}, \\ \mathcal{C}_2 &= \{f : \text{Cov}(f(X^\top \beta^*), X^\top \beta^*) = 0\}. \end{aligned} \quad (2.4)$$

121 The function class  $\mathcal{C}_1$  is a class of normalized link functions. Following from the first-order Stein's  
 122 identity in (2.2), it holds that

$$\text{Cov}(f(X^\top \beta^*), X^\top \beta^*) = \mathbb{E}[f'(X^\top \beta^*)] \cdot \|\beta^*\|_2^2.$$

123 In other words, the definition of  $\mathcal{C}_1$  in (2.4) equivalently requires the link function  $f \in \mathcal{C}_1$  to satisfy  
 124  $\mathbb{E}[f'(X^\top \beta^*)] = 1$ .

125 For any twice differentiable marginal transformation  $\psi$ , we define  $\mathcal{C}(\psi)$  as the class of link functions  
 126  $f$  such that

$$\mathcal{C}(\psi) = \{f : \text{Cov}[\psi(Y), (X^\top \beta^*)^2] / \|\beta^*\|_2^4 \geq 1 \text{ for } Y = f(X^\top \beta^*) + \epsilon\}. \quad (2.5)$$

127 The definition of  $\mathcal{C}(\psi)$  is a generalization of the misspecified phase retrieval model studied by [42, 61]  
 128 with additive noise. By allowing marginal transformations of  $Y$ , such a class also covers the linear  
 129 regression model as a special case.

130 Note that in (2.5), we require the covariance structure  $\text{Cov}[\psi(Y), (X^\top \beta^*)^2]$  to have a magnitude  
 131 comparable to  $\|\beta^*\|_2^4$ . Without any loss of generality, such a requirement specifies the scaling of the  
 132 marginal transformation  $\psi$  and the corresponding link function  $f \in \mathcal{C}(\psi)$ . To see this, note that it  
 133 holds from the second-order Stein's identity in (2.3) that

$$\text{Cov}[\psi(Y), (X^\top \beta^*)^2] = \mathbb{E}[D^2 \psi(f(X^\top \beta^*) + \epsilon)] \cdot \|\beta^*\|_2^4,$$

134 where  $D$  is the differentiation operator with respect to  $X^\top \beta^*$ . In other words, (2.5) equivalently  
 135 requires the link function  $f \in \mathcal{C}(\psi)$  to satisfy  $\mathbb{E}[D^2 \psi(f(X^\top \beta^*) + \epsilon)] \geq 1$ .

136 For  $\psi(y) = y$ , the function class  $\mathcal{C}(\psi)$  defined in (2.5) reduces to the misspecified phase retrieval  
 137 models considered by [42, 61] with additive noise. For  $\psi(y) = y^2$ ,  $\mathcal{C}(\psi)$  characterizes the linear  
 138 regression model, the mixed regression model, and various phase retrieval models, including  $Y =$   
 139  $(X^\top \beta^*)^2 + \epsilon$  and  $Y = |X^\top \beta^*| + \epsilon$ , up to normalizations. In particular,  $\mathcal{C}(\psi)$  also characterizes a  
 140 class of one-hidden-layer neural networks with Rectified Linear Units (ReLU) activation function.  
 141 For a neural network with two neurons in the hidden layer, where the parameters in the first layer are  
 142  $\beta^*$  and  $-\beta^*$ , and the parameter in the second layer is  $(1, 1) \in \mathbb{R}^2$ , we have

$$Y = \max\{X^\top \beta^*, 0\} + \max\{-X^\top \beta^*, 0\} + \epsilon = |X^\top \beta^*| + \epsilon,$$

143 which is captured by  $\mathcal{C}(\psi)$  with  $\psi(y) = y$  or  $\psi(y) = y^2$  up to normalizations.

144 Throughout this paper, we focus on the marginal transformations  $\psi$  such that  $\mathcal{C}(\psi) \cap \mathcal{C}_1 \neq \emptyset$  and  
 145  $\mathcal{C}(\psi) \cap \mathcal{C}_2 \neq \emptyset$ , where the function classes  $\mathcal{C}_1$ ,  $\mathcal{C}_2$ , and  $\mathcal{C}(\psi)$  are defined in (2.4) and (2.5). Such a  
 146 class of marginal transformations  $\psi$  enables us to study the phase transition between  $f_1 \in \mathcal{C}(\psi) \cap \mathcal{C}_1$   
 147 and  $f_2 \in \mathcal{C}(\psi) \cap \mathcal{C}_2$ . As an example, we consider  $\psi(y) = y$ . It holds that  $f_1 \in \mathcal{C}(\psi) \cap \mathcal{C}_1$  for  
 148  $f_1(X^\top \beta^*) = X^\top \beta + (X^\top \beta^*)^2$ , and  $f_2 \in \mathcal{C}(\psi) \cap \mathcal{C}_2$  for  $f_2(X^\top \beta) = (X^\top \beta)^2$ . In other words, it  
 149 holds that  $\mathcal{C}(\psi) \cap \mathcal{C}_1 \neq \emptyset$  and  $\mathcal{C}(\psi) \cap \mathcal{C}_2 \neq \emptyset$  for  $\psi(y) = y$ . With link functions  $f_1 \in \mathcal{C}(\psi) \cap \mathcal{C}_1$   
 150 and  $f_2 \in \mathcal{C}(\psi) \cap \mathcal{C}_2$ , we introduce the following statistical model of interest,

$$Y = \begin{cases} f_1(X^\top \beta^*) + \epsilon, & \text{with probability } \alpha, \\ f_2(X^\top \beta^*) + \epsilon, & \text{with probability } 1 - \alpha, \end{cases} \quad (2.6)$$

151 where  $\epsilon \sim N(0, \sigma^2)$ ,  $X \sim N(0, I_d)$ , and  $\beta^*$  is  $s$ -sparse. We assume that  $f_1$  and  $f_2$  are unknown,  
 152 and  $\psi$  is known a priori. In (2.6), the mixture probability  $\alpha$  controls the magnitude of the first-order  
 153 Stein's association  $S_1(Y)$  defined in Definition 2.1, which characterizes a notion of linearity between  
 154 the response  $Y$  and the index  $X^\top \beta^*$ .

155 Let  $z_i = (y_i, x_i)$  be  $n$  independent observations of (2.6) with  $n \ll d$ , we aim at detecting the  
 156 existence of a nonzero parameter  $\beta^*$ , that is, testing the following hypotheses,

$$H_0: \beta^* = 0 \text{ versus } H_1: \beta^* \neq 0. \quad (2.7)$$

157 In what follows, we assume that  $s$  is a known integer and  $\sigma^2$  is an unknown constant.

158 The difficulty of the testing problem in (2.7) is characterized by the signal-to-noise ratio (SNR),  
 159 which is defined as  $\kappa(\beta^*, \sigma) = \|\beta^*\|_2^2 / \sigma^2$ . Moreover, to characterize the minimum required SNR,  
 160 we consider the following parameter spaces corresponding to the null and alternative hypotheses,

$$\begin{aligned} \mathcal{G}_0 &= \{(\beta^*, \sigma) \in \mathbb{R}^{d+1}: \beta^* = 0\}, \\ \mathcal{G}_1(s, \gamma_n) &= \{(\beta^*, \sigma) \in \mathbb{R}^{d+1}: \|\beta^*\|_0 = s, \kappa(\beta^*, \sigma) \geq \gamma_n\}, \end{aligned} \quad (2.8)$$

161 where  $\{\gamma_n\}_{n=1}^\infty$  is a nonnegative sequence. For notational simplicity, we denote by  $\theta^* = (\beta^*, \sigma)$  and  
 162  $\mathbb{P}_{\theta^*}^n$  the joint distribution of  $\{z_i\}_{i=1}^n$ , which are generated by the model in (2.6) with the parameter of  
 163 interest  $\theta^*$  and nuisance parameters  $f_1$ ,  $f_2$ , and  $\psi$ . For any function  $\phi$  that maps  $\mathbf{z} = (z_1, \dots, z_n) \in$   
 164  $\mathbb{R}^{(d+1) \times n}$  to  $\{0, 1\}$ , the worst-case risk for testing  $H_0: \theta \in \mathcal{G}_0$  versus  $H_1: \theta^* \in \mathcal{G}_1(s, \gamma_n)$  is defined  
 165 as the sum of the maximum type-I and type-II errors,

$$R_n(\phi; \mathcal{G}_0, \mathcal{G}_1) = \sup_{\theta^* \in \mathcal{G}_0} \mathbb{P}_{\theta^*}(\phi = 1) + \sup_{\theta^* \in \mathcal{G}_1} \mathbb{P}_{\theta^*}(\phi = 0). \quad (2.9)$$

166 Correspondingly, the minimax risk is defined as

$$R_n^*(\mathcal{G}_0, \mathcal{G}_1) = \inf_{\phi} \sup_{f_1, f_2, \psi} R_n(\phi; \mathcal{G}_0, \mathcal{G}_1), \quad (2.10)$$

where we take the supreme over the nuisance parameters  $f_1$ ,  $f_2$ , and  $\psi$  of models in (2.6), and the infimum over the function  $\phi$ . We further define the minimax separation rate in the following.

**Definition 2.2** (Minimax separation rate [32, 50]). A sequence  $\{\gamma_n^*\}_{n=1}^\infty$  is called the minimax separation rate if

- (i) given any sequence  $\{\gamma_n\}_{n=1}^\infty$  with  $\gamma_n = o(\gamma_n^*)$ , it holds that  $\liminf_{n \rightarrow \infty} R_n^*(\mathcal{G}_0, \mathcal{G}_1(s, \gamma_n)) = 1$ ,
- (ii) given any sequence  $\{\gamma_n\}_{n=1}^\infty$  with  $\gamma_n = \Omega(\gamma_n^*)$ , it holds that  $\lim_{n \rightarrow \infty} R_n^*(\mathcal{G}_0, \mathcal{G}_1(s, \gamma_n)) = 0$ .

The minimax separation rate characterizes the minimum SNR that guarantees the existence of an asymptotically powerful test. Therefore, it captures the difficulty of the hypothesis testing problem in (2.7).

## 2.2 Oracle Computational Model

In what follows, we introduce an oracle computational model that quantifies the computational cost of an algorithm. Our model follows from the one considered in [16, 53], which is slightly extends the statistical query model originally proposed in [18–20, 30].

**Definition 2.3** (Statistical query model). A statistical oracle  $r$  responds to a given query functions  $q$  with  $Z_q$ , which is a random variable in  $\mathbb{R}$ . We define  $\mathcal{Q} \subseteq \{q : \mathbb{R}^{d+1} \rightarrow [-M, M]\}$  as the space consisting of all the query functions.

We define an algorithm  $\mathcal{A}$  as the iterative process that queries a given statistical oracle with query functions in  $\mathcal{Q}_{\mathcal{A}} \subseteq \mathcal{Q}$  but does not access the data directly. We denote by  $\mathcal{A}(T)$  the set of algorithms that query the statistical oracle  $T$  rounds, where  $T$  is called the oracle complexity. We denote by  $\mathcal{R}[\xi, n, T, \eta(\mathcal{Q}_{\mathcal{A}})]$  the set of statistical oracles  $r$  such that

$$\mathbb{P}\left(\bigcap_{q \in \mathcal{Q}_{\mathcal{A}}} \{|Z_q - \mathbb{E}[q(Z)]| \leq \tau_q\}\right) \geq 1 - 2\xi, \quad (2.11)$$

where  $Z_q$  is the response of the statistical oracle  $r$ ,  $Z = (Y, X)$  is the random variable following the underlying statistical model,  $\xi \in [0, 1]$  is the tail probability, and  $\tau_q$  is the tolerance parameter given by

$$\tau_q = \frac{[\eta(\mathcal{Q}_{\mathcal{A}}) + \log(1/\xi)] \cdot M}{n} \sqrt{\frac{2[\eta(\mathcal{Q}_{\mathcal{A}}) + \log(1/\xi)] \cdot (M^2 - \{\mathbb{E}[q(Y, X)]\}^2)}{n}}. \quad (2.12)$$

Here the parameter  $\eta(\mathcal{Q}_{\mathcal{A}})$  is the logarithmic measure of the capacity of  $\mathcal{Q}_{\mathcal{A}}$ . For a countable  $\mathcal{Q}_{\mathcal{A}}$ , we have  $\eta(\mathcal{Q}_{\mathcal{A}}) = \log(|\mathcal{Q}_{\mathcal{A}}|)$ . For an uncountable  $\mathcal{Q}_{\mathcal{A}}$ , the magnitude  $\eta(\mathcal{Q}_{\mathcal{A}})$  can be the Vapnik-Chervonenkis dimension or the metric entropy.

The intuition behind Definition 2.3 is to separate the algorithm from the dataset. Under this definition, the algorithms we consider are blackbox systems that access the necessary information from a statistical oracle. The definition of the statistical oracle  $r \in \mathcal{R}[\xi, n, T, \eta(\mathcal{Q}_{\mathcal{A}})]$  is a generalization of the sample average. Note that it holds that

$$M^2 - \{\mathbb{E}[q(Y, X)]\}^2 \geq \text{Var}[q(Y, X)]. \quad (2.13)$$

If the response  $z_q$  of the statistical oracle is the sample mean of  $n$  independent realizations of  $q(Z)$ , then (2.11) follows from Bernstein's inequality coupled with a uniform concentration argument over  $\mathcal{Q}_{\mathcal{A}}$ , where the variance term is replaced by its upper bound in (2.13) [16].

To capture the computational difficulty of the hypothesis testing problem in (2.7), we introduce the following definition of computational minimax separation risk, which is an analog of the minimax separation risk defined in (2.10) with an additional constraint on the oracle complexity. We consider the algorithms  $\mathcal{A} \in \mathcal{A}(T)$  associated with the statistical oracle  $r \in \mathcal{R}[\xi, n, T, \eta(\mathcal{Q}_{\mathcal{A}})]$ , and denote by  $\mathcal{H}(\mathcal{A}, r)$  the set of all the test functions based on  $\mathcal{A} \in \mathcal{A}(T)$ , which queries  $r \in \mathcal{R}[\xi, n, T, \eta(\mathcal{Q}_{\mathcal{A}})]$   $T$  rounds. We define the risk for test function  $\phi \in \mathcal{H}(\mathcal{A}, r)$  as

$$\bar{R}_n(\phi; \mathcal{G}_0, \mathcal{G}_1) = \sup_{\theta^* \in \mathcal{G}_0} \mathbb{P}_{\theta^*}(\phi = 1) + \sup_{\theta^* \in \mathcal{G}_1} \mathbb{P}_{\theta^*}(\phi = 0). \quad (2.14)$$

Correspondingly, we define the computational minimax risk as

$$\bar{R}_n^*(\mathcal{G}_0, \mathcal{G}_1; \mathcal{A}, r) = \inf_{\phi \in \mathcal{H}(\mathcal{A}, r)} \sup_{f_1, f_2, \psi} \bar{R}_n(\phi; \mathcal{G}_0, \mathcal{G}_1) \quad (2.15)$$

The probability  $\bar{\mathbb{P}}_{\theta^*}$  in the above formulation is taken over the distribution of responses from the statistical oracle  $r$  under the model in (2.6) with the parameter of interest  $\theta^*$  and nuisance parameter  $f_1, f_2$ , and  $\psi$ . We introduce the following definition of computational minimax separation rate [18, 19, 53].

**Definition 2.4** (Computational minimax separation rate). A sequence  $\{\bar{\gamma}_n^*\}_{n=1}^\infty$  is called the computational minimax separation rate if

(i) given any sequence  $\{\gamma_n\}_{n=1}^\infty$  with  $\gamma_n = o(\bar{\gamma}_n^*)$ , for any  $\eta$  and any  $\mathcal{A} \in \mathcal{A}(d^\eta)$ , there exists a statistical oracle  $r \in \mathcal{R}[\xi, n, d^\mu, \eta(\mathcal{Q}_{\mathcal{A}})]$  such that

$$\liminf_{n \rightarrow \infty} \bar{R}_n^*(\mathcal{G}_0, \mathcal{G}_1(s, \gamma_n); \mathcal{A}, r) = 1,$$

(ii) given any sequence  $\{\gamma_n\}_{n=1}^\infty$  with  $\gamma_n = \Omega(\bar{\gamma}_n^*)$ , there exists an algorithm  $\mathcal{A} \in \mathcal{A}(d^\eta)$  with some absolute constant  $\eta$  such that it holds for any statistical oracle  $r \in \mathcal{R}[\xi, n, d^\mu, \eta(\mathcal{Q}_{\mathcal{A}})]$  that

$$\lim_{n \rightarrow \infty} \bar{R}_n^*(\mathcal{G}_0, \mathcal{G}_1(s, \gamma_n); \mathcal{A}, r) = 0.$$

In the following section, we give the explicit forms of  $\gamma_n^*$  and  $\bar{\gamma}_n^*$ . In particular, when the link function  $f$  deviates from class  $\mathcal{C}_1(\psi)$ , a gap between  $\bar{\gamma}_n^*$  and  $\gamma_n^*$  arises, which characterizes the computational cost to pay for the lack of first-order Stein's association defined in Definition 2.1.

### 3 Main Results

In this section, we lay out the theoretical results. For the hypothesis testing problem in (2.7), we establish the information-theoretic and computational lower bounds by constructing a worst-case hypothesis testing problem. We further establish upper bounds that attain these lower bounds up to logarithmic factors, which is deferred to §A. These lower and upper bounds together characterize the statistical-computational tradeoff. Finally, we show that such a tradeoff in hypothesis testing implies similar computational barriers in parameter estimation.

#### 3.1 Lower Bounds

In what follows, we present lower bounds of the minimax and computational minimax separation rates defined in Definitions 2.2 and 2.4, respectively. For the hypothesis testing problem in (2.7) with parameter spaces defined in (2.8), we have the following proposition that characterizes its information-theoretic difficulty.

**Proposition 3.1.** We assume that  $\beta^*$  in (2.6) is sparse such that  $s = o(d^{1/2-\delta})$  for some positive absolute constant  $\delta$ . For

$$\gamma_n = o\left(\sqrt{\frac{s \log d}{n}} \bigwedge \frac{1}{\alpha^2} \cdot \frac{s \log d}{n}\right), \quad (3.1)$$

it holds that  $\liminf_{n \rightarrow \infty} R_n^*[\mathcal{G}_0, \mathcal{G}_1(s, \gamma_n)] \geq 1$ . In other words, any test for the hypothesis testing problem in (2.7) and (2.8) is asymptotically powerless.

*Proof.* See §B.1 for a detailed proof.  $\square$

It follows from Proposition 3.1 that any sequence satisfying (ii) of Definition 2.2 is asymptotically lower bounded by any sequence that satisfies (3.1). As a result, it holds that

$$\gamma_n^* = \Omega\left(\sqrt{\frac{s \log d}{n}} \bigwedge \frac{1}{\alpha^2} \cdot \frac{s \log d}{n}\right), \quad (3.2)$$

where  $\gamma_n^*$  is the minimax separation rate defined in Definition 2.2. Based on (3.2) and the Theorem A.2, which is deferred to §A, up to logarithmic factors, the minimax separation rate defined in

244 Definition 2.2 takes the form

$$\gamma_n^* = \sqrt{\frac{s \log d}{n}} \bigwedge \frac{1}{\alpha^2} \cdot \frac{s \log d}{n}. \quad (3.3)$$

245 The following theorem establishes a lower bound of the computational minimax separation rate  
246 defined in Definition 2.4.

247 **Theorem 3.2.** We assume that  $\beta^*$  in (2.6) is sparse such that  $s = o(d^{1/2-\delta})$  for some positive  
248 absolute constant  $\delta$ . For any positive absolute constant  $\mu$  and  $\mathcal{A} \in \mathcal{A}(d^\mu)$  with

$$\gamma_n = o\left(\left\{\sqrt{\frac{s^2}{n}} \bigwedge \frac{1}{\alpha^2} \cdot \frac{s}{n}\right\} \vee \gamma_n^*\right), \quad (3.4)$$

249 there exists a statistical oracle  $r \in \mathcal{R}[\xi, n, T, \eta(\mathcal{Q})]$  such that  $\liminf_{n \rightarrow \infty} \bar{R}_n^*(\mathcal{G}_0, \mathcal{G}_1; \mathcal{A}, r) \geq 1$ . In  
250 other words, any computational tractable test for the hypothesis testing problem in (2.7) and (2.8) is  
251 asymptotically powerless.

252 *Proof.* See §B.2 for a detailed proof.  $\square$

253 It follows from Theorem 3.2 that any sequence satisfying (ii) of Definition 2.4 is asymptotically lower  
254 bounded by any sequence that satisfies (3.4). As a result, it holds that

$$\bar{\gamma}_n^* = \Omega\left(\left\{\sqrt{\frac{s^2}{n}} \bigwedge \frac{1}{\alpha^2} \cdot \frac{s}{n}\right\} \vee \gamma_n^*\right), \quad (3.5)$$

255 where  $\gamma_n^*$  and  $\bar{\gamma}_n^*$  are the minimax and computational minimax separation rates defined in Definitions  
256 2.2 and 2.4, respectively. Based on (3.5) and Theorem A.3, which is deferred to §A, up to logarithmic  
257 factors, the computational minimax separation rate defined in Definition 2.4 takes the form

$$\bar{\gamma}_n^* = \sqrt{\frac{s^2}{n}} \bigwedge \frac{1}{\alpha^2} \cdot \frac{s \log d}{n}. \quad (3.6)$$

### 258 3.2 Phase Transition

259 In what follows, we characterize the phase transition in the minimax and computational minimax  
260 separation rates when the mixture probability  $\alpha$  transits from zero to one. We categorize the phase  
261 transition into the following regimes in terms of  $\alpha$ .

- 262 1. For  $0 < \alpha \leq ((\log d)^2/n)^{1/4}$ , our results show that  $\gamma_n^* = \sqrt{s \log d/n}$  and  $\bar{\gamma}_n^* = \sqrt{s^2/n}$ .  
263 For  $\gamma_n = o(\sqrt{s \log d/n})$ , any test for the hypothesis testing problem in (2.7) is asymp-  
264 totically powerless. For  $\gamma_n = \Omega(\sqrt{s \log d/n})$  and  $\gamma_n = o(\sqrt{s^2/n})$ , any asymptotically  
265 powerful test for (2.7) is computationally intractable with superpolynomial oracle complex-  
266 ity defined in Definition 2.3. For  $\gamma_n = \Omega(\sqrt{s^2/n})$ , there exists an asymptotically powerful  
267 test that is computationally tractable with polynomial oracle complexity. In this regime, the  
268 gap between the computational minimax separation rate  $\bar{\gamma}_n^*$  and the minimax separation rate  
269  $\gamma_n^*$  is invariant to  $\alpha$ .
- 270 2. For  $(\log^2 d/n)^{1/4} \leq \alpha \leq (s \log d/n)^{1/4}$ , our results show that  $\gamma_n^* = \sqrt{s \log d/n}$  and  
271  $\bar{\gamma}_n^* = 1/\alpha^2 \cdot s \log d/n$ . For  $\gamma_n = o(\sqrt{s \log d/n})$ , any test is asymptotically powerless.  
272 For  $\gamma_n = \Omega(\sqrt{s \log d/n})$  and  $\gamma_n = o(1/\alpha^2 \cdot s \log d/n)$ , any asymptotically powerful test  
273 for (2.7) is computationally intractable. For  $\gamma_n = \Omega(1/\alpha^2 \cdot s \log d/n)$ , there exists an  
274 asymptotically powerful test that is computationally tractable. In this regime, a larger  $\alpha$   
275 implies a smaller gap between  $\bar{\gamma}_n^*$  and  $\gamma_n^*$ .
- 276 3. For  $(s \log d/n)^{1/4} < \alpha \leq 1$ , our results show that  $\gamma_n^* = \bar{\gamma}_n^* = 1/\alpha^2 \cdot s \log d/n$ . For  $\gamma_n =$   
277  $o(1/\alpha^2 \cdot s \log d/n)$ , any test for the hypothesis testing problem in (2.7) is asymptotically  
278 powerless, whereas for  $\gamma_n = \Omega(1/\alpha^2 \cdot s \log d/n)$ , there exists an asymptotically powerful  
279 test that is computationally tractable. In this regime, the gap between  $\gamma_n^*$  and  $\bar{\gamma}_n^*$  vanishes.

280 By the normalization specified following (2.7), the mixture probability  $\alpha$  characterizes the first-order  
281 Stein's association of the model under the alternative hypothesis. Therefore, the phase transition  
282 implies that when the first-order Stein's association attains its maximum, which corresponds to  $\alpha = 1$ ,

the gap between the computational minimax separation rate  $\bar{\gamma}_n^*$  and the minimax separation rate  $\gamma_n^*$  vanishes, whereas when the first-order Stein's association vanishes, which corresponds to  $\alpha = 0$ , the gap between the computational minimax separation rate  $\bar{\gamma}_n^*$  and the minimax separation rate  $\gamma_n^*$  attains its maximum. In other words, the lack of the first-order Stein's association leads to an extra price of computational cost.

### 3.3 Implication for Parameter Estimation

For the model in (2.6), our result on the computational minimax separation rate in §A implies computational barriers in the estimation of  $\beta^*$ , which is established in the following theorem.

**Theorem 3.3.** For the estimation of  $\beta^*$  in (2.6) with

$$n = o\left(\frac{s^2}{\gamma_n^2} \bigwedge \frac{s \log d}{\gamma_n \cdot \alpha^2}\right), \quad (3.7)$$

where  $\gamma_n = \|\beta^*\|^2/\sigma^2$ , it holds that, for any positive absolute constant  $\mu$  and algorithm  $\mathcal{A} \in \mathcal{A}(T)$  that gives  $\hat{\beta}$  within oracle complexity  $T = O(d^\mu)$ , there exists a statistical oracle  $r \in \mathcal{R}[\xi, n, T, \eta(\mathcal{Q})]$  such that

$$\mathbb{P}(\|\hat{\beta} - \beta^*\|_2 \geq \sigma \|\beta^*\|_2^{-1} \cdot \gamma_n/4) \geq C, \quad (3.8)$$

where  $C$  is a positive absolute constant.

*Proof.* See §B.5 for a detailed proof.  $\square$

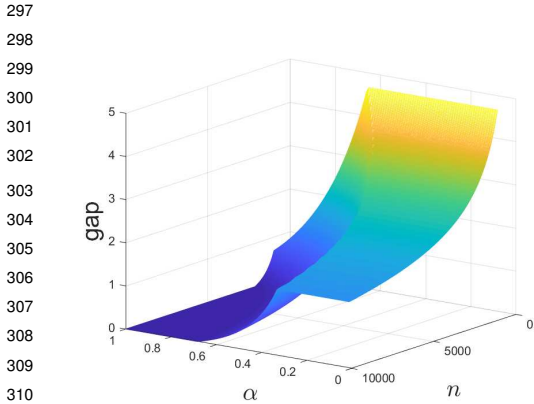

Figure 1: Phase transition in the gap between minimax separation rate and computational minimax separation rate: (i) for  $0 < \alpha \leq ((\log d)^2/n)^{1/4}$ , the gap is invariant to  $\alpha$ . (ii) for  $(\log^2 d/n)^{1/4} \leq \alpha \leq (s \log d/n)^{1/4}$ , a larger  $\alpha$  implies a smaller gap. (iii) for  $(s \log d/n)^{1/4} < \alpha \leq 1$ , the gap vanishes.

agrees with the information-theoretic lower bound. [43] construct a computationally tractable estimator of  $\beta^*$ , which requires the sample size  $n \geq Cs \log(d/s)$  to be statistically consistent. It follows from Theorem 3.3 that such a requirement is necessary.

For  $0 < \alpha < 1$ , we observe a phase transition in the required sample size in terms of  $\alpha$ , which is similar to the phase transition of the computational minimax separation rates. For  $0 < \alpha \leq \sqrt{\gamma_n \log d/s}$ , the requirement becomes  $n \geq Cs^2$ . For  $\sqrt{\gamma_n \log d/s} \leq \alpha \leq 1$ , the requirement becomes  $n \geq Cs \log d/\alpha^2$ . In this regime, a larger  $\alpha$  implies a smaller sample size required for a computationally tractable estimator to be statistically consistent.

For  $\alpha = 0$ , the estimation of  $\beta^*$  in (2.6) reduces to the sparse phase retrieval problem. For simplicity of discussion, let  $\gamma_n = \|\beta^*\|_2^2/\sigma^2$  be a constant in the following discussions. Theorem 3.3 implies that for  $n = o(s^2)$ , any computationally tractable estimator is statistically inconsistent in the sense that  $\|\hat{\beta} - \beta^*\|_2 \geq C$  holds with at least constant probability. [8] construct a computationally tractable estimator for sparse phase retrieval with the quadratic link function  $Y = |X^\top \beta^*|^2 + \epsilon$ . The estimator by [8] is statistically consistent under the assumption that  $n \geq C(1 + \sigma^2/\|\beta^*\|_2^4) \cdot s^2 \log d$ . Similar phenomenon arises in misspecified sparse phase retrieval studied by [42], although their work is slightly more general, in the sense that they consider  $f(X^\top \beta^*, \epsilon)$  as the link function. The estimator by [42] requires  $n \geq Cs^2 \log d$  to be statistically consistent. Both [8] and [42] conjecture that their requirements on the sample size cannot be relaxed for computationally tractable estimators. Theorem 3.3 confirms this conjecture under the statistical query model defined in Definition 2.3.

For  $\alpha = 1$ , the requirement for a computationally tractable estimator to be statistically consistent becomes  $n \geq Cs \log d$ . Such a sample size requirement



## References

- [1] Barak, B., Hopkins, S., Kelner, J., Kothari, P. K., Moitra, A. and Potechin, A. (2019). A nearly tight sum-of-squares lower bound for the planted clique problem. *SIAM Journal on Computing*, **48** 687–735.
- [2] Barak, B. and Steurer, D. (2014). Sum-of-squares proofs and the quest toward optimal algorithms. *arXiv preprint arXiv:1404.5236*.
- [3] Berthet, Q. and Rigollet, P. (2013). Computational lower bounds for sparse PCA. *arXiv preprint arXiv:1304.0828*.
- [4] Berthet, Q., Rigollet, P. et al. (2013). Optimal detection of sparse principal components in high dimension. *The Annals of Statistics*, **41** 1780–1815.
- [5] Brennan, M. and Bresler, G. (2019). Optimal average-case reductions to sparse pca: From weak assumptions to strong hardness. *arXiv preprint arXiv:1902.07380*.
- [6] Brennan, M., Bresler, G. and Huleihel, W. (2018). Reducibility and computational lower bounds for problems with planted sparse structure. In *Conference On Learning Theory*.
- [7] Brennan, M., Bresler, G. and Huleihel, W. (2019). Universality of computational lower bounds for submatrix detection. *arXiv preprint arXiv:1902.06916*.
- [8] Cai, T. T., Li, X., Ma, Z. et al. (2016). Optimal rates of convergence for noisy sparse phase retrieval via thresholded wirtinger flow. *The Annals of Statistics*, **44** 2221–2251.
- [9] Cai, T. T., Liang, T. and Rakhlin, A. (2017). Computational and statistical boundaries for submatrix localization in a large noisy matrix. *The Annals of Statistics*, **45** 1403–1430.
- [10] Candes, E. J., Eldar, Y. C., Strohmer, T. and Voroninski, V. (2015). Phase retrieval via matrix completion. *SIAM review*, **57** 225–251.
- [11] Candes, E. J., Strohmer, T. and Voroninski, V. (2013). Phaselift: Exact and stable signal recovery from magnitude measurements via convex programming. *Communications on Pure and Applied Mathematics*, **66** 1241–1274.
- [12] Chen, Y. and Xu, J. (2014). Statistical-computational tradeoffs in planted problems and submatrix localization with a growing number of clusters and submatrices. *arXiv preprint arXiv:1402.1267*.
- [13] d’Aspremont, A., Ghaoui, L. E., Jordan, M. I. and Lanckriet, G. R. (2005). A direct formulation for sparse pca using semidefinite programming. In *Advances in neural information processing systems*.
- [14] Deshpande, Y. and Montanari, A. (2015). Improved sum-of-squares lower bounds for hidden clique and hidden submatrix problems. In *Conference on Learning Theory*.
- [15] Diaconikolas, I., Kane, D. M. and Stewart, A. (2017). Statistical query lower bounds for robust estimation of high-dimensional gaussians and gaussian mixtures. In *2017 IEEE 58th Annual Symposium on Foundations of Computer Science (FOCS)*. IEEE.
- [16] Fan, J., Liu, H., Wang, Z. and Yang, Z. (2018). Curse of heterogeneity: Computational barriers in sparse mixture models and phase retrieval. *arXiv preprint arXiv:1808.06996*.
- [17] Fan, J. and Yao, Q. (2008). *Nonlinear time series: nonparametric and parametric methods*. Springer Science & Business Media.
- [18] Feldman, V., Grigorescu, E., Reyzin, L., Vempala, S. S. and Xiao, Y. (2017). Statistical algorithms and a lower bound for detecting planted cliques. *Journal of the ACM (JACM)*, **64** 8.
- [19] Feldman, V., Guzmán, C. and Vempala, S. (2017). Statistical query algorithms for mean vector estimation and stochastic convex optimization. In *Proceedings of the Twenty-Eighth Annual ACM-SIAM Symposium on Discrete Algorithms*. SIAM.

- [20] Feldman, V., Perkins, W. and Vempala, S. (2018). On the complexity of random satisfiability problems with planted solutions. *SIAM Journal on Computing*, **47** 1294–1338.
- [21] Gao, C., Ma, Z., Zhou, H. H. et al. (2017). Sparse cca: Adaptive estimation and computational barriers. *The Annals of Statistics*, **45** 2074–2101.
- [22] Goldstein, L., Minsker, S. and Wei, X. (2018). Structured signal recovery from non-linear and heavy-tailed measurements. *IEEE Transactions on Information Theory*, **64** 5513–5530.
- [23] Goldstein, L. and Wei, X. (2018). Non-gaussian observations in nonlinear compressed sensing via stein discrepancies. *Information and Inference: A Journal of the IMA*, **8** 125–159.
- [24] Hajek, B., Wu, Y. and Xu, J. (2015). Computational lower bounds for community detection on random graphs. In *Conference on Learning Theory*.
- [25] Han, A. K. (1987). Non-parametric analysis of a generalized regression model: the maximum rank correlation estimator. *Journal of Econometrics*, **35** 303–316.
- [26] Han, F., Ji, H., Ji, Z., Wang, H. et al. (2017). A provable smoothing approach for high dimensional generalized regression with applications in genomics. *Electronic Journal of Statistics*, **11** 4347–4403.
- [27] Härdle, W. K., Müller, M., Sperlich, S. and Werwatz, A. (2012). *Nonparametric and semiparametric models*. Springer Science & Business Media.
- [28] Hopkins, S. B., Kothari, P. K., Potechin, A., Raghavendra, P., Schramm, T. and Steurer, D. (2017). The power of sum-of-squares for detecting hidden structures. In *Symposium on Foundations of Computer Science*. IEEE.
- [29] Horowitz, J. L. (2009). *Semiparametric and nonparametric methods in econometrics*, vol. 12. Springer.
- [30] Kearns, M. (1998). Efficient noise-tolerant learning from statistical queries. *Journal of the ACM (JACM)*, **45** 983–1006.
- [31] Kothari, P. K. and Mehta, R. (2018). Sum-of-squares meets nash: lower bounds for finding any equilibrium. In *Symposium on Theory of Computing*. ACM.
- [32] Le Cam, L. (1956). On the asymptotic theory of estimation and testing hypotheses. In *Proceedings of the Third Berkeley Symposium on Mathematical Statistics and Probability, Volume 1: Contributions to the Theory of Statistics*. The Regents of the University of California.
- [33] Lecué, G. and Mendelson, S. (2013). Minimax rate of convergence and the performance of erm in phase recovery. *arXiv preprint arXiv:1311.5024*.
- [34] Lu, H., Cao, Y., Lu, J., Liu, H. and Wang, Z. (2018). The edge density barrier: Computational-statistical tradeoffs in combinatorial inference. In *International Conference on Machine Learning*.
- [35] Lu, X., Chen, G., Singh, R. S. and K. Song, P. X. (2006). A class of partially linear single-index survival models. *Canadian Journal of Statistics*, **34** 97–112.
- [36] Ma, T. and Wigderson, A. (2015). Sum-of-squares lower bounds for sparse pca. In *Advances in Neural Information Processing Systems*.
- [37] Ma, Z., Wu, Y. et al. (2015). Computational barriers in minimax submatrix detection. *The Annals of Statistics*, **43** 1089–1116.
- [38] Meka, R., Potechin, A. and Wigderson, A. (2015). Sum-of-squares lower bounds for planted clique. In *Symposium on Theory of computing*. ACM.
- [39] Nelder, J. A. and Wedderburn, R. W. (1972). Generalized linear models. *Journal of the Royal Statistical Society: Series A (General)*, **135** 370–384.

- 420 [40] Neykov, M., Lin, Q. and Liu, J. S. (2015). Signed support recovery for single index models in  
421 high-dimensions. *arXiv preprint arXiv:1511.02270*.
- 422 [41] Neykov, M., Liu, J. S. and Cai, T. (2016).  $\ell_1$ -regularized least squares for support recovery of  
423 high dimensional single index models with gaussian designs. *Journal of Machine Learning*  
424 *Research*, **17** 1–37.
- 425 [42] Neykov, M., Wang, Z. and Liu, H. (2016). Agnostic estimation for misspecified phase retrieval  
426 models. *Advances in Neural Information Processing Systems*.
- 427 [43] Plan, Y. and Vershynin, R. (2016). The generalized lasso with non-linear observations. *IEEE*  
428 *Transactions on Information Theory*, **62** 1528–1537.
- 429 [44] Plan, Y., Vershynin, R. and Yudovina, E. (2016). High-dimensional estimation with geometric  
430 constraints. *Information and Inference: A Journal of the IMA*, **6** 1–40.
- 431 [45] Potechin, A. (2017). Sum of squares lower bounds from symmetry and a good story. *arXiv*  
432 *preprint arXiv:1711.11469*.
- 433 [46] Raskutti, G., Wainwright, M. J. and Yu, B. (2011). Minimax rates of estimation for high-  
434 dimensional linear regression over  $\ell_q$ -balls. *IEEE transactions on information theory*, **57**  
435 6976–6994.
- 436 [47] Tan, Y. S. (2017). Sparse phase retrieval via sparse pca despite model misspecification: A  
437 simplified and extended analysis. *arXiv preprint arXiv:1712.04106*.
- 438 [48] Thrampoulidis, C. and Rawat, A. S. (2017). Lifting high-dimensional nonlinear models with  
439 gaussian regressors. *arXiv preprint arXiv:1712.03638*.
- 440 [49] Tibshirani, R. (1996). Regression shrinkage and selection via the Lasso. *Journal of the Royal*  
441 *Statistical Society: Series B (Methodological)*, **58** 267–288.
- 442 [50] Tsybakov, A. B. (2009). Introduction to nonparametric estimation. revised and extended from  
443 the 2004 french original. translated by vladimir zaiats.
- 444 [51] Vershynin, R. (2010). Introduction to the non-asymptotic analysis of random matrices. *arXiv*  
445 *preprint arXiv:1011.3027*.
- 446 [52] Verzelen, N. et al. (2012). Minimax risks for sparse regressions: Ultra-high dimensional  
447 phenomena. *Electronic Journal of Statistics*, **6** 38–90.
- 448 [53] Wang, Z., Gu, Q. and Liu, H. (2015). Sharp computational-statistical phase transitions via  
449 oracle computational model. *arXiv preprint arXiv:1512.08861*.
- 450 [54] Wang, Z., Gu, Q. and Liu, H. (2016). On the statistical limits of convex relaxations. In  
451 *International Conference on Machine Learning*.
- 452 [55] Wu, T. Z., Yu, K. and Yu, Y. (2010). Single-index quantile regression. *Journal of Multivariate*  
453 *Analysis*, **101** 1607–1621.
- 454 [56] Wu, Y. and Xu, J. (2018). Statistical problems with planted structures: Information-theoretical  
455 and computational limits. *arXiv preprint arXiv:1806.00118*.
- 456 [57] Yang, Z., Balasubramanian, K. and Liu, H. (2017). High-dimensional non-Gaussian single  
457 index models via thresholded score function estimation. In *Proceedings of the 34th International*  
458 *Conference on Machine Learning-Volume 70*. JMLR. org.
- 459 [58] Yang, Z., Balasubramanian, K. and Liu, H. (2017). High-dimensional non-gaussian single  
460 index models via thresholded score function estimation. *Proceedings of Machine Learning*  
461 *Research*.
- 462 [59] Yang, Z., Balasubramanian, K. and Liu, H. (2017). On stein’s identity and near-optimal estima-  
463 tion in high-dimensional index models. *arXiv preprint arXiv:1709.08795*.

- 464 [60] Yang, Z., Balasubramanian, K., Wang, P. Z. and Liu, H. (2017). Estimating high-dimensional  
465 non-gaussian multiple index models via Stein’s lemma. In *Advances in Neural Information*  
466 *Processing Systems*.
- 467 [61] Yang, Z., Yang, L. F., Fang, E. X., Zhao, T., Wang, Z. and Neykov, M. (2017). Misspecified  
468 nonconvex statistical optimization for phase retrieval. *arXiv preprint arXiv:1712.06245*.
- 469 [62] Yi, X., Wang, Z., Yang, Z., Caramanis, C. and Liu, H. (2016). More supervision, less computa-  
470 tion: Statistical-computational tradeoffs in weakly supervised learning. *Advances in Neural*  
471 *Information Processing Systems*.

## 472 A Upper bounds

473 In this section, we establish upper bounds that attain the lower bounds obtained in Proposition 3.1 and  
 474 Theorem A.2 up to logarithmic factors. Based on the lower bounds and upper bounds, we obtain the  
 475 minimax and computational minimax separation rates defined in Definitions 2.2 and 2.4, respectively.

476 Recall that the hypothesis testing problem in (2.7) takes the form

$$H_0: Y = \epsilon_0 \text{ versus } H_1: Y = \begin{cases} f_1(X^\top \beta^*) + \epsilon, & \text{with probability } \alpha, \\ f_2(X^\top \beta^*) + \epsilon, & \text{with probability } 1 - \alpha. \end{cases} \quad (\text{A.1})$$

477 Here  $\epsilon$  is a Gaussian noise with variance  $\sigma^2$  and  $\epsilon_0$  is a noise such that the variances of  $Y$  under the  
 478 null and alternative hypotheses are the same. Besides,  $f_1 \in \mathcal{C}_1 \cap \mathcal{C}(\psi)$  and  $f_2 \in \mathcal{C}_2 \cap \mathcal{C}(\psi)$  are two  
 479 unknown link functions, where  $\mathcal{C}_1(\psi)$ ,  $\mathcal{C}_2(\psi)$ , and  $\mathcal{C}(\psi)$  are defined in (2.4) and (2.5). Meanwhile,  
 480 we set  $X \sim N(0, I_d)$  and  $\beta^*$  to be  $s$ -sparse. For the simplicity of the following discussions, we  
 481 restrict to the set of  $\beta^*$  such that  $\beta^* = \rho \cdot v^*$ , where  $v^* \in \bar{\mathcal{G}}(s) = \{v \in \{-1, 0, 1\}^d : \|v\|_0 = s\}$ .  
 482 We further define

$$\bar{\mathcal{G}}_1(s, \gamma_n) = \{(\beta^*, \sigma) \in \mathbb{R}^{d+1} : \beta^* = \rho \cdot v^*, v^* \in \bar{\mathcal{G}}(s), \kappa(\beta^*, \sigma) \geq \gamma_n\}.$$

483 We highlight the fact that such a restricted parameter set is sufficient to characterize the difficulty of  
 484 the hypothesis testing problem in (2.7), and defer the proof of the general case to §D.

485 Let  $Z = (Y, X)$  and  $\mathbb{P}_0, \mathbb{P}_{v^*}$  be the distributions of  $Z$  under the null and alternative hypotheses,  
 486 respectively. We introduce the following assumption on  $Y$  and  $\psi(Y)$  under the alternative hypothesis,  
 487 which regulates the tail and moment of  $Y$  and  $\psi(Y)$ .

488 **Assumption A.1.** We assume that  $Y$  and  $\psi(Y)$  have bounded fourth moments. We further assume  
 489 that under the alternative hypothesis,  $Y$  and  $\psi(Y)$  have desired tail bounds in the form of

$$\mathbb{P}_{v^*}(|Y| \geq R) \leq C \exp(-R^\nu), \quad \mathbb{P}_{v^*}(|\psi(Y)| \geq R) \leq C' \exp(-R^\nu), \quad (\text{A.2})$$

490 which holds for a sufficiently large  $R$  and positive absolute constants  $C, C'$ , and  $\nu$ .

491 Assumption A.1 is required only for the upper bounds. It is needed to construct bounded query  
 492 functions defined in Definition 2.3. Such an assumption is a mild regularity condition in the sense  
 493 that it holds for the linear regression model and most of the phase retrieval models. For instance, let  
 494  $(Y, X)$  be generated by the mixed regression model and  $\psi(Y) = Y^2$ . Then  $Y$  follows the mixture of  
 495 Gaussian distributions. Therefore,  $Y$  has bounded fourth moment and Gaussian tail, and  $\psi(Y) = Y^2$   
 496 is sub-exponential under the alternative hypothesis with bounded fourth moment. Hence, the tail  
 497 bound stated in (A.2) holds for  $Y$  and  $\psi(Y)$  with  $\nu = 1$ . Similar arguments hold for the linear  
 498 regression model and the phase retrieval models  $Y = |X^\top \beta^*| + \epsilon$  and  $Y = (X^\top \beta^*)^2 + \epsilon$ .

499 In what follows, we design the test function  $\phi$  based on the first-order and second-order Stein's  
 500 identities in (2.2) and (2.3). Following from (2.5), it holds that  $S_2(Y, \psi) \geq \|\beta^*\|_2^4$  under the  
 501 alternative hypothesis. It then follows from the second-order Stein's identity in (2.3) that  $\mathbb{E}_{\mathbb{P}_{v^*}}[\psi(Y) \cdot$   
 502  $(XX^\top - I)] \geq \beta^* \beta^{*\top}$  under the alternative hypothesis. Meanwhile, under the null hypothesis,  $\psi(Y)$   
 503 is independent of  $X$ . Therefore, it holds that

$$\mathbb{E}_{\mathbb{P}_{v^*}}[v^\top \psi(Y) \cdot (XX^\top - I)v] \geq (v^\top \beta^*)^2, \quad \mathbb{E}_{\mathbb{P}_0}[\psi(Y) \cdot (XX^\top - I)] = 0. \quad (\text{A.3})$$

504 Meanwhile, following from (2.4), it holds that  $\mathbb{E}[Y_1 X] = \beta^*$  with  $Y_1 = f_1(X^\top \beta^*, \epsilon)$ . Therefore, it  
 505 follows from the first-order Stein's identity in (2.2) that

$$\mathbb{E}_{\mathbb{P}_{v^*}}[v^\top Y X] = \alpha \cdot v^\top \beta^*, \quad \mathbb{E}_{\mathbb{P}_0}[Y X] = 0. \quad (\text{A.4})$$

506 We introduce the following query functions,

$$q_{1,v}(Y, X) = \psi(Y) \cdot [s^{-1}(v^\top X)^2 - 1] \cdot \mathbb{1}\{|\psi(Y)| \leq (R \log n)^{1/\nu}\} \cdot \mathbb{1}\{|v^\top X| \leq R \cdot \sqrt{s \log n}\},$$

$$q_{2,v}(Y, X) = Y \cdot (s^{-1/2} v^\top X) \cdot \mathbb{1}\{|Y| \leq (R \log n)^{1/\nu}\} \cdot \mathbb{1}\{|v^\top X| \leq R \cdot \sqrt{s \log n}\}. \quad (\text{A.5})$$

507 We denote by  $\bar{Z}_{1,v}$  and  $\bar{Z}_{2,v}$  the responses of the statistical oracle to query functions  $q_{1,v}$  and  $q_{2,v}$ , as  
 508 defined in Definition 2.3. We define the test functions  $\phi_1$  and  $\phi_2$  as

$$\phi_1 = \mathbb{1}\left\{\sup_{v \in \bar{\mathcal{G}}(s)} \bar{Z}_{1,v} \geq \tau_1\right\}, \quad \phi_2 = \mathbb{1}\left\{\sup_{v \in \bar{\mathcal{G}}(s)} \bar{Z}_{2,v} \geq \tau_2\right\}, \quad (\text{A.6})$$

509 where we set the thresholds  $\tau_1$  and  $\tau_2$  to be

$$\tau_1 = CR^{2+1/\nu} \cdot (\log n)^{1+1/\nu} \cdot \sqrt{\frac{s \log d}{n}}, \quad \tau_2 = C'R^{1+1/\nu} \cdot (\log n)^{1/2+1/\nu} \cdot \sqrt{\frac{s \log d}{n}}. \quad (\text{A.7})$$

Here  $C$  and  $C'$  are absolute constants (which are specified in §B.3). We define the test function as  $\phi = \phi_1 \vee \phi_2$ . The following theorem characterizes an upper bound for the minimax separation rate by quantifying the SNR for  $\phi$  to be asymptotically powerful, which attains the information-theoretic lower bound in Proposition 3.1 up to logarithmic factors.

**Theorem A.2.** We consider the hypothesis testing problem in (A.1) under Assumption A.1. For

$$\gamma_n = \Omega\left((\log n)^{1+1/\nu} \cdot \sqrt{\frac{s \log d}{n}} \bigwedge \frac{(\log n)^{1+2/\nu}}{\alpha^2} \cdot \frac{s \log d}{n}\right), \quad (\text{A.8})$$

it holds that  $R_n(\phi; \mathcal{G}_0, \bar{\mathcal{G}}_1) = O(1/d)$ . In other words,  $\phi$  is asymptotically powerful.

*Proof.* See §B.3 for a detailed proof.  $\square$

It follows from Theorem A.2 that any sequence satisfying (i) of Definition 2.2 is asymptotically upper bounded by any sequence that satisfies (A.8). As a result, it holds that

$$\gamma_n^* = o\left((\log n)^{1+1/\nu} \cdot \sqrt{\frac{s \log d}{n}} \bigwedge \frac{(\log n)^{1+2/\nu}}{\alpha^2} \cdot \frac{s \log d}{n}\right). \quad (\text{A.9})$$

Based on (3.2) and (A.9), up to logarithmic factors, the minimax separation rate defined in Definition 2.2 takes the form

$$\gamma_n^* = \sqrt{\frac{s \log d}{n}} \bigwedge \frac{1}{\alpha^2} \cdot \frac{s \log d}{n}. \quad (\text{A.10})$$

Note that the query functions in (A.5) have exponential oracle complexity, since searching over the parameter set  $\bar{\mathcal{G}}(s)$  requires querying the statistical oracle  $T = \binom{d}{s} \cdot 2^s$  rounds. To construct a computationally tractable test, we design query functions that access each entry  $X_j$  of  $X$ ,

$$\begin{aligned} q_{1,j}(Y, X) &= \psi(Y) \cdot (X_j^2 - 1) \cdot \mathbb{1}\{|\psi(Y)| \leq (R \log n)^{1/\nu}\} \cdot \mathbb{1}\{|X_j| \leq R\sqrt{\log n}\}, \quad j \in [d] \\ q_{2,j}(Y, X) &= Y \cdot X_j \cdot \mathbb{1}\{|Y| \leq (R \log n)^{1/\nu}\} \cdot \mathbb{1}\{|X_j| \leq R\sqrt{\log n}\}, \quad j \in [d]. \end{aligned} \quad (\text{A.11})$$

We denote by  $\bar{Z}_{1,j}$  and  $\bar{Z}_{2,j}$  the responses of the statistical oracle to the query functions  $q_{1,j}$  and  $q_{2,j}$ , as defined in Definition 2.3. We define the test functions  $\tilde{\phi}_1$  and  $\tilde{\phi}_2$  as

$$\tilde{\phi}_1 = \mathbb{1}\left\{\sup_{j \in [d]} \bar{Z}_{1,j} \geq \tilde{\tau}_1\right\}, \quad \tilde{\phi}_2 = \mathbb{1}\left\{\sup_{j \in [d]} \bar{Z}_{2,j} \geq \tilde{\tau}_2\right\} \bigvee \mathbb{1}\left\{\inf_{j \in [d]} \bar{Z}_{2,j} \leq -\tilde{\tau}_2\right\}, \quad (\text{A.12})$$

where we set the thresholds  $\tilde{\tau}_1$  and  $\tilde{\tau}_2$  to be

$$\tilde{\tau}_1 = CR^{2+1/\nu}(\log n)^{1+1/\nu} \cdot \sqrt{\frac{\log d}{n}}, \quad \tilde{\tau}_2 = C'R^{1+1/\nu}(\log n)^{1/2+1/\nu} \cdot \sqrt{\frac{\log d}{n}}. \quad (\text{A.13})$$

Finally, we define the test function to be  $\tilde{\phi} = \tilde{\phi}_1 \vee \tilde{\phi}_2$ . By the definition of  $\phi_1$  and  $\phi_2$  in (A.12), the test function  $\tilde{\phi}$  is computationally tractable with query complexity  $T = 2d$ . The following theorem characterizes an upper bound for the computational minimax separation rate, which attains the computational lower bound in Theorem 3.2 up to logarithmic factors.

**Theorem A.3.** We consider the hypothesis testing problem in (A.1) under Assumption A.1. For

$$\gamma_n = \Omega\left((\log n)^{1+1/\nu} \cdot \sqrt{\frac{s^2 \log d}{n}} \bigwedge \frac{(\log n)^{1+2/\nu}}{\alpha^2} \cdot \frac{s \log d}{n}\right), \quad (\text{A.14})$$

it holds that  $\bar{R}_n(\tilde{\phi}; \mathcal{G}_0, \bar{\mathcal{G}}_1) = O(1/d)$ . In other words,  $\tilde{\phi}$  is asymptotically powerful.

*Proof.* See §B.4 for a detailed proof.  $\square$

It follows from Theorem A.3 that any sequence satisfying (i) of Definition 2.4 is asymptotically upper bounded by any sequence that satisfies (A.14). As a result, it holds that

$$\bar{\gamma}_n^* = o\left((\log n)^{1+1/\nu} \cdot \sqrt{\frac{s^2 \log d}{n}} \bigwedge \frac{(\log n)^{1+2/\nu}}{\alpha^2} \cdot \frac{s \log d}{n}\right). \quad (\text{A.15})$$

Based on (3.5) and (A.15), up to logarithmic factors, the computational minimax separation rate defined in Definition 2.4 takes the form

$$\bar{\gamma}_n^* = \sqrt{\frac{s^2}{n}} \bigwedge \frac{1}{\alpha^2} \cdot \frac{s \log d}{n}. \quad (\text{A.16})$$

## B Proof of Main Results

In this section, we lay out the proofs of the main results in §3 and §A.

### B.1 Proof of Proposition 3.1

*Proof.* We have the following lower bound of minimax risk,

$$\begin{aligned} R_n^*(\mathcal{G}_0, \mathcal{G}_1) &= \inf_{\phi} \sup_{f_1, f_2, \psi} R_n(\phi; \mathcal{G}_0, \mathcal{G}_1) \geq \inf_{\phi} R_n(\phi; \mathcal{G}_0, \mathcal{G}_1) \\ &= \inf_{\phi} \left\{ \sup_{\theta^* \in \mathcal{G}_0} \mathbb{P}_{\theta^*}(\phi = 1) + \sup_{\theta^* \in \mathcal{G}_1} \mathbb{P}_{\theta^*}(\phi = 0) \right\}. \end{aligned}$$

where the first inequality is obtained by restricting  $f_1$ ,  $f_2$ , and  $\psi$  in the testing problem in (2.7) as follows. We set  $\psi(y) = y^2$  and the sample  $\{z_i\}_{i \in [n]}$  to be generated from a mixture of the linear regression model  $Y_1 = f_1(X^\top \beta^*) + \epsilon = X^\top \beta^* + \epsilon$  and the mixed regression model  $Y_2 = f_2(X^\top \beta^*) + \epsilon = \eta \cdot X^\top \beta^* + \epsilon$ . Here we set  $\epsilon \sim N(0, \sigma^2)$  and  $\eta$  to be a Rademacher random variable, which is independent of both  $X$  and  $\epsilon$ . Since  $S_1(Y_1) = \|\beta^*\|_2^2$ ,  $S_1(Y_2) = 0$ , and  $S_2(Y_1, \psi) = S_2(Y_2, \psi) = 2\|\beta^*\|_2^4$ , we have  $f_1 \in \mathcal{C}_1 \cap \mathcal{C}(\psi)$  and  $f_2 \in \mathcal{C}_2 \cap \mathcal{C}(\psi)$ , where  $\mathcal{C}_1$ ,  $\mathcal{C}_2$ , and  $\mathcal{C}(\psi)$  are defined in (2.4) and (2.5).

We further restrict the parameter space of  $\theta^* = (\beta^*, \sigma)$  as follows. Let  $\beta^* \in \{\beta = \rho \cdot v : v \in \mathcal{G}(s)\}$ , where  $\rho$  is a positive constant and  $\mathcal{G}(s) = \{v \in \{0, 1\}^d : \|v\|_0 = s\}$ . Therefore, the original hypothesis testing problem is reduced to

$$H_0 : Y = \epsilon_0 \text{ versus } H_1 : Y = \begin{cases} X^\top \beta^* + \epsilon, & \text{with probability } \alpha, \\ \eta \cdot X^\top \beta^* + \epsilon, & \text{with probability } 1 - \alpha, \end{cases} \quad (\text{B.1})$$

where under  $H_0$  we have  $\epsilon_0 \sim N(0, \sigma^2 + s\rho^2)$  and under  $H_1$  we have  $\epsilon \sim N(0, \sigma^2)$ . We denote by  $\mathbb{P}_0$  and  $\mathbb{P}_{v^*}$  the probability distributions of  $Z = (Y, X)$  under the null and alternative hypotheses with  $\beta^* = \rho \cdot v^*$ , respectively. In addition, we define  $\bar{\mathbb{P}} = |\mathcal{G}(s)|^{-1} \sum_{v \in \mathcal{G}(s)} \mathbb{P}_v^n$ , where we use the superscript  $n$  to denote the  $n$ -fold product probability measure. By Neyman-Pearson lemma, we have

$$\begin{aligned} R_n^*(\mathcal{G}_0, \mathcal{G}_1) &\geq \inf_{\phi} [\mathbb{P}_0^n(\phi = 1) + \bar{\mathbb{P}}(\phi = 0)] = 1 - 1/2 \cdot \mathbb{E}_{\mathbb{P}_0^n} [|\text{d}\bar{\mathbb{P}}/\text{d}\mathbb{P}_0^n - 1|] \\ &\geq 1 - 1/2 \cdot \left( (\mathbb{E}_{\mathbb{P}_0^n} [\text{d}\bar{\mathbb{P}}/\text{d}\mathbb{P}_0^n])^2 - 1 \right)^{1/2}, \end{aligned} \quad (\text{B.2})$$

where the second inequality follows from the Cauchy-Schwarz inequality. In what follows, we show that  $\mathbb{E}_{\mathbb{P}_0^n} [\text{d}\bar{\mathbb{P}}/\text{d}\mathbb{P}_0^n]^2 = 1 + o(1)$  under the condition in (3.1), which implies  $\liminf_{n \rightarrow \infty} R_n^*(\mathcal{G}_0, \mathcal{G}_1) \geq 1 - o(1)$  by (B.2). Note that on the right-hand side of (B.2), we have

$$(\mathbb{E}_{\mathbb{P}_0^n} [\text{d}\bar{\mathbb{P}}/\text{d}\mathbb{P}_0^n])^2 = \frac{1}{|\mathcal{G}(s)|^2} \sum_{v, v' \in \mathcal{G}(s)} \mathbb{E}_{\mathbb{P}_0^n} \left[ \frac{\text{d}\mathbb{P}_v^n}{\text{d}\mathbb{P}_0^n} \frac{\text{d}\mathbb{P}_{v'}^n}{\text{d}\mathbb{P}_0^n} (Z_1, \dots, Z_n) \right], \quad (\text{B.3})$$

where  $Z_i$  are independent copies of  $Z = (Y, X)$ . The following lemma establishes an upper bound of the right-hand side of (B.3).

**Lemma B.1.** For any  $v_1, v_2 \in \mathcal{G}(s)$ , if  $s\rho^2 = o(1)$ , it holds that

$$\mathbb{E}_{\mathbb{P}_0} \left[ \frac{\text{d}\mathbb{P}_{v_1}}{\text{d}\mathbb{P}_0} \frac{\text{d}\mathbb{P}_{v_2}}{\text{d}\mathbb{P}_0} (Z) \right] \leq \cosh \left( \frac{2\rho^2 \langle v_1, v_2 \rangle}{\sigma^2 + s\rho^2} \right) + \alpha^2 \sinh \left( \frac{2\rho^2 \langle v_1, v_2 \rangle}{\sigma^2 + s\rho^2} \right). \quad (\text{B.4})$$

*Proof.* See §C.1 for a detailed proof. □

Following from Lemma B.1, it holds that

$$\begin{aligned} \mathbb{E}_{\mathbb{P}_0^n} \left[ \frac{\text{d}\mathbb{P}_{v_1}^n}{\text{d}\mathbb{P}_0^n} \frac{\text{d}\mathbb{P}_{v_2}^n}{\text{d}\mathbb{P}_0^n} (Z_1, \dots, Z_n) \right] &= \left( \mathbb{E}_{\mathbb{P}_0} \left[ \frac{\text{d}\mathbb{P}_{v_1}}{\text{d}\mathbb{P}_0} \frac{\text{d}\mathbb{P}_{v_2}}{\text{d}\mathbb{P}_0} (Z) \right] \right)^n \\ &\leq \left[ \cosh \left( \frac{2\rho^2 \langle v_1, v_2 \rangle}{\sigma^2 + s\rho^2} \right) + \alpha^2 \sinh \left( \frac{2\rho^2 \langle v_1, v_2 \rangle}{\sigma^2 + s\rho^2} \right) \right]^n, \end{aligned} \quad (\text{B.5})$$

where  $Z_i$  are independent copies of  $Z = (Y, X)$ . The following lemma by [62] establishes an upper bound of the right-hand side in (B.5).

566 **Lemma B.2** ([62]). For any  $x \geq 0$  and  $0 \leq k \leq 1$ , we have,  

$$\cosh(x) + k \sinh(x) \leq \exp(2kx) \vee \cosh(2x).$$

567 *Proof.* See the appendix of [62] for a detailed proof.  $\square$

568 Following from (B.3), (B.5), and Lemma B.2, we conclude

$$\left(\mathbb{E}_{\mathbb{P}_0^n}[\mathrm{d}\bar{\mathbb{P}}/\mathrm{d}\mathbb{P}_0^n]\right)^2 \leq \frac{1}{|\mathcal{G}(s)|^2} \sum_{v_1, v_2 \in \mathcal{G}(s)} \left[ \exp\left(\frac{4\alpha^2 \rho^2 \langle v_1, v_2 \rangle}{\sigma^2 + s\rho^2}\right) \vee \cosh\left(\frac{4\rho^2 \langle v_1, v_2 \rangle}{\sigma^2 + s\rho^2}\right) \right]^n. \quad (\text{B.6})$$

569 The following lemma shows that the right-hand side of (B.6) is of order  $1 + o(1)$ .

570 **Lemma B.3** ([62]). For

$$\gamma_n = o\left(\sqrt{\frac{s \log d}{n}} \wedge \frac{1}{\alpha^2} \cdot \frac{s \log d}{n}\right),$$

571 if  $s = o(d^{1/2-\delta})$  for some absolute constant  $\delta > 0$ , it then holds that

$$\frac{1}{|\mathcal{G}(s)|^2} \sum_{v_1, v_2 \in \mathcal{G}(s)} \left[ \exp\left(\frac{4\alpha^2 \rho^2 \langle v_1, v_2 \rangle}{\sigma^2 + s\rho^2}\right) \vee \cosh\left(\frac{4\rho^2 \langle v_1, v_2 \rangle}{\sigma^2 + s\rho^2}\right) \right]^n = 1 + o(1). \quad (\text{B.7})$$

572 *Proof.* See §C.2 for a detailed proof.  $\square$

573 Combining Lemma B.3 and (B.6), we conclude that for  $\gamma_n = o(\sqrt{s \log d/n} \wedge 1/\alpha^2 \cdot s \log d/n)$ , it holds that  $(\mathbb{E}_{\mathbb{P}_0^n}[\mathrm{d}\bar{\mathbb{P}}/\mathrm{d}\mathbb{P}_0^n])^2 - 1 = o(1)$ . Then following from (B.2), we have  
574  $\liminf_{n \rightarrow \infty} R_n^*(\mathcal{G}_0, \mathcal{G}_1) \geq 1$ , which concludes the proof of Proposition 3.1.  $\square$   
575

## 576 B.2 Proof of Theorem 3.2

577 *Proof.* It follows from Definition 2.2 that for  $\gamma_n = o(\gamma_n^*)$ , any hypothesis testing problem in  
578 (2.7) is asymptotically powerless. It remains to show that for  $\gamma_n = o(\sqrt{s^2/n} \wedge 1/\alpha^2 \cdot s/n)$ , any  
579 computationally tractable test is asymptotically powerless. First, we restrict the original estimation  
580 problem to the following hypothesis testing problem,

$$H_0: Y = \epsilon \text{ versus } H_1: Y = \begin{cases} X^\top \beta^* + \epsilon, & \text{with probability } \alpha \\ \eta \cdot X^\top \beta^* + \epsilon, & \text{with probability } 1 - \alpha \end{cases}. \quad (\text{B.8})$$

581 In (B.8), we restrict  $\beta^*$  to the set  $\beta^* \in \{\rho \cdot v : v \in \mathcal{G}(s)\}$  with  $\mathcal{G}(s) = \{v \in \{0, 1\}^d : \|v\|_0 = s\}$ .  
582 We set  $\epsilon \sim N(0, \sigma^2 + s\rho^2)$  under  $H_0$  and  $\epsilon \sim N(0, \sigma^2)$  under  $H_1$  so that straightforward tests based  
583 on mean and variance are not able to detect the existence of a nonzero parameter  $\beta^*$ .

584 By restricting the parameter space, we obtain a lower bound for the minimax risk. Recall that we  
585 denote by  $\bar{\mathbb{P}}_0$  and  $\bar{\mathbb{P}}_v$  the distributions of  $Z_q$ , which denotes the response of the oracle to the query  $q$   
586 when the true distributions of the data are  $\mathbb{P}_0$  and  $\mathbb{P}_v$ , correspondingly. We have

$$\bar{R}_n^*[\mathcal{G}_0, \mathcal{G}_1; \mathcal{A}, r] \geq \inf_{\phi \in \mathcal{H}(\mathcal{A}, r)} \left\{ \bar{\mathbb{P}}_0(\phi = 1) + \sup_{v \in \mathcal{G}(s)} \bar{\mathbb{P}}_v(\phi = 0) \right\}. \quad (\text{B.9})$$

587 To show that any computationally tractable test is asymptotically powerless, it suffices to show that  
588 the right-hand side of (B.9) is asymptotically lower bounded by one. By Theorem 4.2 of [53], we  
589 know that this holds true if

$$T \cdot \sup_{q \in \mathcal{Q}} |\mathcal{C}(q)|/|\mathcal{G}(s)| = o(1),$$

590 where  $\mathcal{C}(q)$  is defined as

$$\mathcal{C}(q) = \{v \in \mathcal{G}(s) : |\mathbb{E}_{\mathbb{P}_v}[q(Z)] - \mathbb{E}_{\mathbb{P}_0}[q(Z)]| > \tau_q\}.$$

591 Here  $\tau_q$  is the tolerance parameter defined in Definition 2.3, with  $(Y, X)$  following  $\mathbb{P}_v$ . The following  
592 lemma shows that  $T \cdot \sup_{q \in \mathcal{Q}} |\mathcal{C}(q)|/|\mathcal{G}(s)| = o(1)$  if  $\gamma_n$  is sufficiently small.

593 **Lemma B.4** ([53]). For  $s = o(d^{1/2-\delta})$ ,  $T = O(d^\mu)$ , and

$$\gamma_n = o\left(\frac{s^2}{n} \wedge \frac{1}{\alpha^2} \cdot \frac{s}{n}\right),$$



594 it holds that

$$T \cdot \sup_{q \in \mathcal{Q}} |\mathcal{C}(q)|/|\mathcal{G}(s)| = o(1). \quad (\text{B.10})$$

595 *Proof.* See §C.3 for a detailed proof.  $\square$

596 By combining Theorem 4.2 of [53] and Lemma B.4, we conclude that the right-hand side of (B.9)  
597 is asymptotically lower bounded by one. Therefore, it holds that  $\liminf_{n \rightarrow \infty} \bar{R}_n^*[\mathcal{G}_0, \mathcal{G}_1; \mathcal{A}, r] \geq 1$ ,  
598 which concludes the proof of Theorem 3.2.  $\square$

### 599 B.3 Proof of Theorem A.2

600 *Proof.* Recall that we denote by  $Z = (Y, X)$  and  $\mathbb{P}_0, \mathbb{P}_{v^*}$  the distributions of  $Z$  under the null and  
601 alternative hypotheses with  $\beta^* = \rho \cdot v^*$ , respectively. For the hypothesis testing problem in (A.1),  
602 the following lemma characterizes the expectations of the query functions defined in (A.5).

603 **Lemma B.5.** For any  $v, v^* \in \bar{\mathcal{G}}(s)$  and

$$\gamma_n = \Omega\left((\log n)^{1+1/\nu} \cdot \sqrt{\frac{s \log d}{n}} \wedge \frac{(\log n)^{1+2/\nu}}{\alpha^2} \cdot \frac{s \log d}{n}\right),$$

604 it holds that

$$\mathbb{E}_{\mathbb{P}_0}[q_{1,v}(Y, X)] \leq 1/n, \quad \mathbb{E}_{\mathbb{P}_0}[q_{2,v}(Y, X)] \leq 1/n. \quad (\text{B.11})$$

605 In addition, it holds that

$$\begin{aligned} \mathbb{E}_{\mathbb{P}_{v^*}}[q_{1,v^*}(Y, X)] &\geq s\rho^2/2 \text{ if } \gamma_n = \Omega\left((\log n)^{1+1/\nu} \cdot \sqrt{\frac{s \log d}{n}}\right), \\ \mathbb{E}_{\mathbb{P}_{v^*}}[q_{2,v^*}(Y, X)] &\geq \sqrt{\alpha^2 s \rho^2}/2 \text{ if } \gamma_n = \Omega\left(\frac{(\log n)^{1+2/\nu}}{\alpha^2} \cdot \frac{s \log d}{n}\right). \end{aligned} \quad (\text{B.12})$$

606 *Proof.* See §C.4 for a detailed proof.  $\square$

607 In what follows, we establish an upper bound of the risk of  $\phi = \phi_1 \vee \phi_2$ . Recall that we define the  
608 test functions  $\phi_1$  and  $\phi_2$  in (A.6) with parameters

$$\tau_1 = CR^{2+1/\nu} \cdot (\log n)^{1+1/\nu} \cdot \sqrt{\frac{s \log d}{n}}, \quad \tau_2 = C'R^{1+1/\nu} \cdot (\log n)^{1/2+1/\nu} \cdot \sqrt{\frac{s \log d}{n}}. \quad (\text{B.13})$$

609 where  $C$  and  $C'$  are absolute constants. Note that the total number of query functions  $\{q_{1,v}\}_{v \in \mathcal{G}(s)}$   
610 and  $\{q_{2,v}\}_{v \in \mathcal{G}(s)}$  is  $|\mathcal{Q}_\phi| = 2 \cdot \binom{d}{s} \cdot 2^s$ . Therefore, following from (2.12) with  $\xi = 1/d$ , for sufficiently  
611 large  $d$  and  $n$ , it holds that

$$\tau_{q_{1,v}} \leq C_0 R^{2+1/\nu} (\log n)^{1/2+1/\nu} \cdot \sqrt{\frac{s \log d}{n}}, \quad \tau_{q_{2,v}} \leq C_1 R^{1+1/\nu} (\log n)^{1/2+1/\nu} \cdot \sqrt{\frac{s \log d}{n}}, \quad (\text{B.14})$$

612 where  $\tau_{q_{1,v}}$  and  $\tau_{q_{2,v}}$  are the tolerance parameters of  $q_{1,v}$  and  $q_{2,v}$  defined in Definition 2.3, and  
613  $C_0, C_1$  are positive absolute constants. We fix  $C$  and  $C'$  in (B.13) such that  $\tau_1 \geq \tau_{q_{1,v}} + 1/n$  and  
614  $\tau_2 \geq \tau_{q_{2,v}} + 1/n$ . Recall that we denote by  $\bar{Z}_{1,v}$  and  $\bar{Z}_{2,v}$  the responses of the statistical oracle to  
615 the query functions  $q_{1,v}$  and  $q_{2,v}$ . Further recall that we denote by  $\bar{\mathbb{P}}_0$  and  $\bar{\mathbb{P}}_{v^*}$  the distributions of  
616 response of the statistical oracle to the query functions when the true distribution of the data is  $\mathbb{P}_0$   
617 and  $\mathbb{P}_{v^*}$ . Following from Lemma B.5, it holds for any  $v \in \mathcal{G}(s)$  and  $i \in \{1, 2\}$  that

$$\bar{\mathbb{P}}_0(\bar{Z}_{i,v} \geq \tau_i) \leq \bar{\mathbb{P}}_0(|\bar{Z}_{i,v} - \mathbb{E}_{\mathbb{P}_0}[q_{i,v}(Y, X)]| \geq \tau_{q_{i,v}}).$$

618 Based on (2.11) with  $\xi = 1/d$ , it holds for  $i \in \{1, 2\}$  that

$$\begin{aligned} \bar{\mathbb{P}}_0(\phi_i = 1) &= \bar{\mathbb{P}}_0\left(\sup_{v \in \mathcal{G}(s)} \bar{Z}_{i,v} > \tau_i\right) \\ &\leq \bar{\mathbb{P}}_0\left(\bigcup_{v \in \mathcal{G}(s)} \left\{|\bar{Z}_{i,v} - \mathbb{E}_{\mathbb{P}_0}[q_{i,v}(Y, X)]| > \tau_{q_{i,v}}\right\}\right) \leq 2/d. \end{aligned} \quad (\text{B.15})$$

619 Recall that we define  $\phi = \phi_1 \vee \phi_2$ . Therefore, we obtain from (B.15) that

$$\bar{\mathbb{P}}_0(\phi = 1) \leq \bar{\mathbb{P}}_0(\phi_1 = 1) + \bar{\mathbb{P}}_0(\phi_2 = 1) = 4/d. \quad (\text{B.16})$$

620 In other words, the type-I error of  $\phi$  is upper bounded by  $4/d$ . It remains to upper bound the type-II  
 621 error of  $\phi$ . Following from the lower bound of SNR in (A.8), it holds that either  $s\rho^2/4 \geq \tau_1$  or  
 622  $\sqrt{\alpha^2 s\rho^2}/4 \geq \tau_2$  for a sufficiently large  $n$ . Following from Lemma B.5, if  $s\rho^2/4 \geq \tau_1$ , it holds that

$$\begin{aligned} \bar{\mathbb{P}}_{v^*}(\bar{Z}_{1,v^*} \leq \tau_1) &\leq \bar{\mathbb{P}}_{v^*}(\bar{Z}_{1,v^*} \leq \mathbb{E}_{\mathbb{P}_{v^*}}[q_{1,v^*}(Y, X)] - \tau_1) \\ &\leq \bar{\mathbb{P}}_{v^*}\left(|\bar{Z}_{1,v^*} - \mathbb{E}_{\mathbb{P}_{v^*}}[q_{1,v^*}(Y, X)]| \geq \tau_{q_{1,v^*}}\right), \end{aligned} \quad (\text{B.17})$$

623 where the last inequality holds since  $\tau_1 > \tau_{q_{1,v^*}}$ . Therefore, it follows from (2.11) with  $\xi = 1/d$  that

$$\begin{aligned} \bar{\mathbb{P}}_{v^*}(\phi_1 = 0) &= \bar{\mathbb{P}}_{v^*}\left(\sup_{v \in \mathcal{G}(s)} \bar{Z}_{1,v} < \tau_1\right) \leq \bar{\mathbb{P}}_{v^*}(\bar{Z}_{1,v^*} < \tau_1) \\ &\leq \bar{\mathbb{P}}_{v^*}\left(|\bar{Z}_{1,v^*} - \mathbb{E}_{\mathbb{P}_{v^*}}[q_{1,v^*}(Y, X)]| > \tau_{q_{1,v^*}}\right) \leq 2/d. \end{aligned} \quad (\text{B.18})$$

624 Similarly, following from Lemma B.5, if  $\sqrt{\alpha^2 s\rho^2}/4 \geq \tau_2$ , it holds that,

$$\begin{aligned} \bar{\mathbb{P}}_{v^*}(\phi_2 = 0) &= \bar{\mathbb{P}}_{v^*}\left(\sup_{v \in \mathcal{G}(s)} \bar{Z}_{2,v} < \tau_2\right) \leq \bar{\mathbb{P}}_{v^*}(\bar{Z}_{2,v^*} < \tau_2) \\ &\leq \bar{\mathbb{P}}_{v^*}\left(|\bar{Z}_{2,v^*} - \mathbb{E}_{\mathbb{P}_{v^*}}[q_{2,v^*}(Y, X)]| > \tau_{q_{2,v^*}}\right) \leq 2/d, \end{aligned} \quad (\text{B.19})$$

625 where the last inequality holds since  $\tau_2 > \tau_{q_{2,v^*}}$ . Note that (B.18) and (B.19) holds for any  $(\beta^*, \sigma) \in$   
 626  $\bar{\mathcal{G}}_1(s, \gamma_n)$  if (A.8) holds. Therefore, by combining (B.18) and (B.19), we have

$$\sup_{(\beta^*, \sigma) \in \bar{\mathcal{G}}_1(s, \gamma_n)} \bar{\mathbb{P}}_{v^*}(\phi = 0) \leq \sup_{(\beta^*, \sigma) \in \bar{\mathcal{G}}_1(s, \gamma_n)} \{\bar{\mathbb{P}}_{v^*}(\phi_1 = 0) \wedge \bar{\mathbb{P}}_{v^*}(\phi_2 = 0)\} \leq 2/d. \quad (\text{B.20})$$

627 In other words, the type-II error of  $\phi$  is upper bounded by  $2/d$ . By combining (B.16) and (B.20), we  
 628 conclude that if (A.8) holds, the risk for  $\phi$  is of order  $O(1/d)$ , which completes the proof of Theorem  
 629 A.2.  $\square$

#### 630 B.4 Proof of Theorem A.3

631 *Proof.* The proof is similar to that of Theorem A.2 in §B.3. Recall that we denote by  $Z = (Y, X)$  and  
 632  $\mathbb{P}_0, \mathbb{P}_{v^*}$  the distributions of  $Z$  under the null and alternative hypotheses with  $\beta^* = \rho \cdot v^*$ , respectively.  
 633 The following lemma characterizes the expectations of the query functions defined in (A.11).

634 **Lemma B.6.** For any  $v^* \in \bar{\mathcal{G}}(s)$  and

$$\gamma_n = \Omega\left((\log n)^{1+1/\nu} \cdot \sqrt{\frac{s^2 \log d}{n}} \bigwedge \frac{(\log n)^{1+2/\nu}}{\alpha^2} \cdot \frac{s \log d}{n}\right),$$

635 it holds that

$$\sup_{j \in [d]} \mathbb{E}_{\mathbb{P}_0}[q_{1,j}(Y, X)] \leq 1/n, \quad \sup_{j \in [d]} \mathbb{E}_{\mathbb{P}_0}[q_{2,j}(Y, X)] \leq 1/n. \quad (\text{B.21})$$

636 In addition, it holds that

$$\begin{aligned} \sup_{j \in [d]} \mathbb{E}_{\mathbb{P}_{v^*}}[q_{1,j}(Y, X)] &\geq \rho^2/2 \text{ if } \gamma_n = \Omega\left((\log n)^{1+1/\nu} \cdot \sqrt{\frac{s^2 \log d}{n}}\right), \\ \sup_{j \in [d]} |\mathbb{E}_{\mathbb{P}_{v^*}}[q_{2,j}(Y, X)]| &\geq \alpha\rho/2 \text{ if } \gamma_n = \Omega\left(\frac{(\log n)^{1+2/\nu}}{\alpha^2} \cdot \frac{s \log d}{n}\right). \end{aligned} \quad (\text{B.22})$$

637 *Proof.* See §C.5 for a detailed proof.  $\square$

638 In what follows, we upper bound the risk of the test function  $\tilde{\phi} = \tilde{\phi}_1 \vee \tilde{\phi}_2$ . Recall that we define the  
 639 test functions  $\tilde{\phi}_1$  and  $\tilde{\phi}_2$  in (A.11) with parameters

$$\tilde{\tau}_1 = CR^{2+1/\nu} \cdot (\log n)^{1+1/\nu} \cdot \sqrt{\frac{\log d}{n}}, \quad \tilde{\tau}_2 = C'R^{1+1/\nu} \cdot (\log n)^{1/2+1/\nu} \cdot \sqrt{\frac{\log d}{n}}, \quad (\text{B.23})$$

640 where  $C, C'$  are absolute constants. Note that the total number of query functions  $\{q_{1,j}\}_{j \in [d]}$  and  
 641  $\{q_{2,j}\}_{j \in [d]}$  is  $|\mathcal{Q}_{\tilde{\phi}}| = 2d$ . Therefore, following from Definition 2.3 with  $\xi = 1/d$ , for sufficiently

large  $d$  and  $n$ , the tolerance parameters of  $q_{1,j}$  and  $q_{2,j}$  are upper bounded as follows,

$$\tau_{q_{1,j}} \leq C'_0 R^{2+1/\nu} (\log n)^{1/2+1/\nu} \cdot \sqrt{\frac{\log d}{n}}, \quad \tau_{q_{2,j}} \leq C'_1 R^{1+1/\nu} (\log n)^{1/2+1/\nu} \cdot \sqrt{\frac{\log d}{n}}, \quad (\text{B.24})$$

where  $C'_0$  and  $C'_1$  are positive absolute constants. We fix  $C$  and  $C'$  in (B.13) such that  $\tilde{\tau}_1 \geq \tau_{q_{1,j}} + 1/n$  and  $\tilde{\tau}_2 \geq \tau_{q_{2,j}} + 1/n$ . Recall that we denote by  $\bar{Z}_{1,j}$  and  $\bar{Z}_{2,j}$  the responses of the statistical oracle to the query functions  $q_{1,j}$  and  $q_{2,j}$ , respectively. Further recall that we denote by  $\bar{\mathbb{P}}_0$  and  $\bar{\mathbb{P}}_{v^*}$  the distributions of response of the statistical oracle to the query functions when the true distribution of the data is  $\mathbb{P}_0$  and  $\mathbb{P}_{v^*}$ . Following from Lemma B.6, for any  $j \in [d]$  and  $i \in \{1, 2\}$ , it holds that

$$\bar{\mathbb{P}}_0(\bar{Z}_{i,j} \geq \tilde{\tau}_1) \leq \bar{\mathbb{P}}_0(|\bar{Z}_{i,j} - \mathbb{E}_{\mathbb{P}_0}[q_{i,j}(Y, X)]| \geq \tau_{q_{i,j}}).$$

Based on (2.11) with  $\xi = 1/d$ , it holds for  $i \in \{1, 2\}$  that

$$\begin{aligned} \bar{\mathbb{P}}_0(\tilde{\phi}_i = 1) &= \bar{\mathbb{P}}_0\left(\sup_{j \in [d]} \bar{Z}_{i,j} > \tilde{\tau}_i\right) \\ &\leq \bar{\mathbb{P}}_0\left(\bigcup_{j \in [d]} \left\{|\bar{Z}_{i,j} - \mathbb{E}_{\mathbb{P}_0}[q_{i,j}(Y, X)]| > \tau_{q_{i,j}}\right\}\right) \leq 2/d, \end{aligned} \quad (\text{B.25})$$

Recall that we define  $\tilde{\phi} = \tilde{\phi}_1 \vee \tilde{\phi}_2$ . Therefore, we obtain from (B.25) that

$$\bar{\mathbb{P}}_0(\tilde{\phi} = 1) \leq \bar{\mathbb{P}}_0(\tilde{\phi}_1 = 1) + \bar{\mathbb{P}}_0(\tilde{\phi}_2 = 1) = 4/d. \quad (\text{B.26})$$

In other words, the type-I error of  $\tilde{\phi}$  is upper bounded by  $4/d$ . It remains to upper bound the type-II error of  $\phi$ . Following from the lower bound on SNR in (A.14), it holds that either  $\rho^2/4 \geq \tilde{\tau}_1$  or  $\alpha\rho/4 \geq \tilde{\tau}_2$  with a sufficiently large  $n$ . For any  $v^* \in \bar{\mathcal{G}}(s)$ , let  $j^* = \arg\max_{j \in [d]} \mathbb{E}_{\mathbb{P}_{v^*}}[q_{1,j}(Y, X)]$ . Following from Lemma B.5, if  $\rho^2/4 \geq \tilde{\tau}_1$ , it holds that

$$\begin{aligned} \bar{\mathbb{P}}_{v^*}(\bar{Z}_{1,j^*} \leq \tilde{\tau}_1) &\leq \bar{\mathbb{P}}_{v^*}(\bar{Z}_{1,j^*} \leq \mathbb{E}_{\mathbb{P}_{v^*}}[q_{1,j^*}(Y, X)] - \tilde{\tau}_1) \\ &\leq \bar{\mathbb{P}}_{v^*}(|\bar{Z}_{1,j^*} - \mathbb{E}_{\mathbb{P}_{v^*}}[q_{1,j^*}(Y, X)]| \geq \tau_{q_{1,j^*}}), \end{aligned} \quad (\text{B.27})$$

where the last inequality holds since  $\tilde{\tau}_1 > \tau_{q_{1,j^*}}$ . Therefore, we conclude from (2.11) with  $\xi = 1/d$  that

$$\begin{aligned} \bar{\mathbb{P}}_{v^*}(\tilde{\phi}_1 = 0) &= \bar{\mathbb{P}}_{v^*}\left(\sup_{j \in [d]} \bar{Z}_{1,j} < \tilde{\tau}_1\right) \leq \bar{\mathbb{P}}_{v^*}(\bar{Z}_{1,j^*} < \tilde{\tau}_1) \\ &\leq \bar{\mathbb{P}}_{v^*}(|\bar{Z}_{1,j^*} - \mathbb{E}_{\mathbb{P}_{v^*}}[q_{1,j^*}(Y, X)]| > \tau_{q_{1,j^*}}) \leq 2/d. \end{aligned} \quad (\text{B.28})$$

Similarly, for any  $v^* \in \bar{\mathcal{G}}(s)$ , let  $k^* = \arg\max_{j \in [d]} \mathbb{E}_{\mathbb{P}_{v^*}}[q_{2,j}(Y, X)]$  and  $\ell^* = \arg\min_{j \in [d]} \mathbb{E}_{\mathbb{P}_{v^*}}[q_{2,j}(Y, X)]$ . Following from Lemma B.5, if  $\alpha\rho/4 \geq \tilde{\tau}_2$ , it holds that either  $\mathbb{E}[q_{2,k^*}(Y, X)] \geq \alpha\rho/2$  or  $\mathbb{E}[q_{2,\ell^*}(Y, X)] \leq -\alpha\rho/2$ . If it holds that  $\mathbb{E}_{\mathbb{P}_{v^*}}[q_{2,k^*}(Y, X)] \geq \alpha\rho/2 \geq 2\tilde{\tau}_2$ , we have

$$\begin{aligned} \bar{\mathbb{P}}_{v^*}(\tilde{\phi}_2 = 0) &\leq \bar{\mathbb{P}}_{v^*}\left(\sup_{j \in [d]} \bar{Z}_{2,j} < \tilde{\tau}_2\right) \leq \bar{\mathbb{P}}_{v^*}(\bar{Z}_{2,k^*} < \tilde{\tau}_2) \\ &\leq \bar{\mathbb{P}}_{v^*}(|\bar{Z}_{2,k^*} - \mathbb{E}_{\mathbb{P}_{v^*}}[q_{2,k^*}(Y, X)]| > \tau_{q_{2,k^*}}) \leq 2/d, \end{aligned} \quad (\text{B.29})$$

where the last inequality holds since  $\tilde{\tau}_2 > \tau_{q_{2,k^*}}$ . If it holds that  $\mathbb{E}_{\mathbb{P}_{v^*}}[q_{2,\ell^*}(Y, X)] \leq -\alpha\rho/2 \leq -2\tilde{\tau}_2$ , we have

$$\begin{aligned} \bar{\mathbb{P}}_{v^*}(\tilde{\phi}_2 = 0) &\leq \bar{\mathbb{P}}_{v^*}\left(\inf_{j \in [d]} \bar{Z}_{2,j} > -\tilde{\tau}_2\right) \leq \bar{\mathbb{P}}_{v^*}(\bar{Z}_{2,\ell^*} > -\tilde{\tau}_2) \\ &\leq \bar{\mathbb{P}}_{v^*}(|\bar{Z}_{2,\ell^*} - \mathbb{E}_{\mathbb{P}_{v^*}}[q_{2,\ell^*}(Y, X)]| > \tau_{q_{2,\ell^*}}) \leq 2/d, \end{aligned} \quad (\text{B.30})$$

where the last inequality holds since  $\tilde{\tau}_2 > \tau_{q_{2,\ell^*}}$ . Note that (B.28), (B.29), and (B.30) holds for any  $(\beta^*, \sigma) \in \bar{\mathcal{G}}_1(s, \gamma_n)$  if (A.14) holds. Therefore, by combining (B.28), (B.29), and (B.30), we have

$$\sup_{(\beta^*, \sigma) \in \bar{\mathcal{G}}_1(s, \gamma_n)} \bar{\mathbb{P}}_{v^*}(\tilde{\phi} = 0) \leq \sup_{(\beta^*, \sigma) \in \bar{\mathcal{G}}_1(s, \gamma_n)} \{\bar{\mathbb{P}}_{v^*}(\tilde{\phi}_1 = 0) \wedge \bar{\mathbb{P}}_{v^*}(\tilde{\phi}_2 = 0)\} \leq 2/d. \quad (\text{B.31})$$

664 In other words, the type-II error of  $\phi$  is upper bounded by  $2/d$ . By combining (B.26) and (B.31),  
 665 we conclude that if (A.14) holds, the risk for  $\tilde{\phi}$  is of order  $O(1/d)$ , which completes the proof of  
 666 Theorem A.3.  $\square$

### 667 B.5 Proof of Theorem 3.3

668 *Proof.* We prove by contradiction in the following. We assume that there exist an absolute constant  
 669  $\eta$  and an algorithm  $\mathcal{A} \in \mathcal{A}(T)$  with  $T = O(d^\eta)$  that estimates  $\beta^*$  in (2.6), such that for any given  
 670 oracle  $r \in \mathcal{R}[\xi, n, T, \eta(\mathcal{Q})]$ , it holds that

$$\bar{\mathbb{P}}(\|\hat{\beta} - \beta^*\|_2^2/\sigma^2 \geq \gamma_n/16) = o(1), \quad (\text{B.32})$$

671 where  $\hat{\beta}$  is the estimator of  $\beta^*$ . In other words, it holds that  $\|\hat{\beta} - \beta^*\|_2^2/\sigma^2 \leq \gamma_n/16$  with probability  
 672  $1 - o(1)$ . Recall that we set  $\|\beta^*\|_2^2/\sigma^2 = \gamma_n$ . Based on (B.32), it holds with probability  $1 - o(1)$  that

$$\|\hat{\beta} + \beta^*\|_2^2 \leq (\|\hat{\beta} - \beta^*\|_2 + 2\|\beta^*\|_2)^2 \leq 2\|\hat{\beta} - \beta^*\|_2^2 + 8\|\beta^*\|_2^2 \leq (1/8 + 8) \cdot \sigma^2 \gamma_n. \quad (\text{B.33})$$

673 Combining (B.32) and (B.33), it follows from the Cauchy-Schwartz inequality that

$$\|\hat{\beta}\|_2^2 - \|\beta^*\|_2^2 = |(\hat{\beta} - \beta^*)^\top (\hat{\beta} + \beta^*)| \leq \|\hat{\beta} - \beta^*\|_2 \cdot \|\hat{\beta} + \beta^*\|_2 \leq 5/8 \cdot \sigma^4 \gamma_n^2, \quad (\text{B.34})$$

674 which holds with probability  $1 - o(1)$ . In what follows, we construct an asymptotically powerful  
 675 test with  $T = O(d^\eta)$  query complexity for the hypothesis testing problem in (2.7). We set  $\phi =$   
 676  $\mathbb{1}\{\|\hat{\beta}\|_2^2 \geq \gamma_n/5\}$ , where  $\hat{\beta}$  is the estimator of  $\beta^*$  given the algorithm  $\mathcal{A}$ . Following from (B.32),  
 677 it holds with probability  $1 - o(1)$  that  $\|\hat{\beta}\|_2^2/\sigma^2 \leq \gamma_n/16$  under the null hypothesis with  $\beta^* = 0$ .  
 678 Meanwhile, following from (B.34), it holds with probability  $1 - o(1)$  that  $\|\hat{\beta}\|_2^2/\sigma^2 \geq \gamma_n/5$  under  
 679 the alternative hypothesis with  $\beta^* \neq 0$  and  $\|\beta^*\|_2^2/\sigma^2 = \gamma_n$ . In other words,  $\phi$  is asymptotically  
 680 powerful and computationally tractable with  $\gamma_n = o(\sqrt{s^2/n} \wedge 1/\alpha^2 \cdot s \log d/n)$ , which contradicts  
 681 the computational minimax separation rate in (A.16).  $\square$

## 682 C Proof of Lemmas

683 In this section, we lay out the proof of the lemmas in §B.

### 684 C.1 Proof of Lemma B.1

685 *Proof.* It follows from the model in (B.1) that under the alternative hypothesis,

$$\begin{aligned} Z = (Y, X) &\sim \alpha \cdot N(0, \Sigma(v)) + \frac{1-\alpha}{2} \cdot N(0, \Sigma(v)) + \frac{1-\alpha}{2} \cdot N(0, \Sigma(-v)), \\ &\sim \frac{1+\alpha}{2} \cdot N(0, \Sigma(v)) + \frac{1-\alpha}{2} \cdot N(0, \Sigma(-v)), \end{aligned}$$

686 where  $\Sigma(v)$  is the covariance matrix

$$\Sigma(v) = \begin{bmatrix} \sigma^2 + s\rho^2 & \rho v^\top \\ \rho v & I_d \end{bmatrix} \in \mathbb{R}^{(d+1) \times (d+1)}. \quad (\text{C.1})$$

687 Meanwhile, we have  $Z = (Y, X) \sim N(0, \Sigma_0)$  under the null hypothesis, where we denote by  
 688  $\Sigma_0 = \Sigma(0)$ . Recall that we denote by  $\mathbb{P}_v$  and  $\mathbb{P}_0$  the distributions of  $Z$  under the alternative and null  
 689 hypotheses, respectively. Therefore, it holds that

$$\begin{aligned} \frac{d\mathbb{P}_v}{d\mathbb{P}_0}(Z) &= \frac{1+\alpha}{2} \cdot \sqrt{\frac{\det(\Sigma_0)}{\det(\Sigma(v))}} \cdot \exp\left(-\frac{Z(\Sigma^{-1}(v) - \Sigma_0^{-1})Z^\top}{2}\right) \\ &\quad + \frac{1-\alpha}{2} \cdot \sqrt{\frac{\det(\Sigma_0)}{\det(\Sigma(-v))}} \cdot \exp\left(-\frac{Z(\Sigma^{-1}(-v) - \Sigma_0^{-1})Z^\top}{2}\right), \end{aligned} \quad (\text{C.2})$$

690 where we denote by  $\Sigma^{-1}(v)$  the inverse matrix of  $\Sigma(v)$ . We denote by  $\xi$  the Bernoulli random  
 691 variable with distribution

$$\mathbb{P}(\xi = 1) = \frac{1+\alpha}{2}, \quad \mathbb{P}(\xi = -1) = \frac{1-\alpha}{2}. \quad (\text{C.3})$$

Therefore, it follows from (C.2) that

$$\frac{d\mathbb{P}_v}{d\mathbb{P}_0}(Z) = \mathbb{E}_\xi \left[ \sqrt{\frac{\det(\Sigma_0)}{\det(\Sigma(\xi v))}} \cdot \exp\left(-\frac{Z(\Sigma^{-1}(\xi v) - \Sigma_0^{-1})Z^\top}{2}\right) \right]. \quad (\text{C.4})$$

Following from (C.4), for  $v_1$  and  $v_2$  in  $\mathcal{G}(s)$ , we have

$$\begin{aligned} \mathbb{E}_{\mathbb{P}_0} \left[ \frac{d\mathbb{P}_{v_1}}{d\mathbb{P}_0} \frac{d\mathbb{P}_{v_2}}{d\mathbb{P}_0}(Z) \right] &= \mathbb{E}_{\mathbb{P}_0} \mathbb{E}_{\xi_1, \xi_2} \left[ \frac{\det(\Sigma_0)}{\sqrt{\det(\Sigma(\xi_1 v_1)) \cdot \det(\Sigma(\xi_2 v_2))}} \right. \\ &\quad \left. \cdot \exp\left(-1/2 \cdot Z^\top (\Sigma^{-1}(\xi_1 v_1) + \Sigma^{-1}(\xi_2 v_2) - 2\Sigma_0^{-1})Z\right) \right], \end{aligned} \quad (\text{C.5})$$

where  $\xi_1$  and  $\xi_2$  are independent copies of  $\xi$  defined in (C.3). In what follows, we calculate the right-hand side of (C.5) by invoking Fubini's theorem. We first calculate the right-hand side of (C.5) by integrating under  $\mathbb{P}_0$  and obtain that

$$\begin{aligned} \mathbb{E}_{\mathbb{P}_0} \left[ \exp\left(-1/2 \cdot Z^\top (\Sigma^{-1}(\xi_1 v_1) + \Sigma^{-1}(\xi_2 v_2) - 2\Sigma_0^{-1})Z\right) \right] \\ = \frac{1}{\sqrt{(2\pi)^{d+1} \cdot \det(\Sigma_0)}} \cdot \int_{z \in \mathbb{R}^{d+1}} \exp\left(-1/2 \cdot z^\top (\Sigma^{-1}(\xi_1 v_1) + \Sigma^{-1}(\xi_2 v_2) - \Sigma_0^{-1})z\right) d\mathbb{P}_0(z) \\ = \left( \det(\Sigma^{-1}(\xi_1 v_1) + \Sigma^{-1}(\xi_2 v_2) - \Sigma_0^{-1}) \cdot \det(\Sigma_0) \right)^{-1/2}. \end{aligned} \quad (\text{C.6})$$

By plugging (C.6) into (C.5), we obtain

$$\begin{aligned} \mathbb{E}_{\xi_1, \xi_2} \mathbb{E}_{\mathbb{P}_0} \left[ \frac{\det(\Sigma_0)}{\sqrt{\det(\Sigma(\xi_1 v_1)) \cdot \det(\Sigma(\xi_2 v_2))}} \cdot \exp\left(-1/2 \cdot Z^\top (\Sigma^{-1}(\xi_1 v_1) + \Sigma^{-1}(\xi_2 v_2) - 2\Sigma_0^{-1})Z\right) \right] \\ = \mathbb{E}_{\xi_1, \xi_2} \left[ \frac{\det(\Sigma_0)}{\sqrt{\det(\Sigma(\xi_1 v_1)) \cdot \det(\Sigma(\xi_2 v_2))}} \cdot \left( \det(\Sigma^{-1}(\xi_1 v_1) + \Sigma^{-1}(\xi_2 v_2) - \Sigma_0^{-1}) \det(\Sigma_0) \right)^{-1/2} \right] \\ = \sqrt{\det(\Sigma_0)} \cdot \mathbb{E}_{\xi_1, \xi_2} \left[ \det(\Sigma(\xi_1 v_1) + \Sigma(\xi_2 v_2) - \Sigma(\xi_1 v_1)\Sigma_0^{-1}\Sigma(\xi_2 v_2))^{-1/2} \right]. \end{aligned} \quad (\text{C.7})$$

Meanwhile, by (C.1) it holds that  $\det(\Sigma_0) = \sigma^2 + s\rho^2$  and

$$\begin{aligned} \Sigma(\xi_1 v_1) + \Sigma(\xi_2 v_2) - \Sigma(\xi_1 v_1) \cdot \Sigma_0^{-1} \cdot \Sigma(\xi_2 v_2) \\ = \begin{bmatrix} \sigma^2 + s\rho^2(1 - \xi_1 \xi_2 \cdot v_1^\top v_2) & 0 \\ 0 & I_d - (\rho^2 \xi_1 \xi_2)/(\sigma^2 + s\rho^2) \cdot v_1 v_2^\top \end{bmatrix}. \end{aligned} \quad (\text{C.8})$$

Therefore, we are able to calculate the right-hand side of (C.7) explicitly. Combining (C.5) and (C.7) and apply Fubini's theorem, we obtain that

$$\mathbb{E}_{\mathbb{P}_0} \left[ \frac{d\mathbb{P}_{v_1}}{d\mathbb{P}_0} \frac{d\mathbb{P}_{v_2}}{d\mathbb{P}_0}(Z) \right] = \mathbb{E}_{\xi_1, \xi_2} \left[ 1 - \frac{\rho^2 \xi_1 \xi_2}{\sigma^2 + s\rho^2} \cdot \langle v_1, v_2 \rangle \right]. \quad (\text{C.9})$$

Recall that  $\xi_1$  and  $\xi_2$  are independent copies of  $\xi$  defined in (C.3), it then holds that

$$\mathbb{E}_{\mathbb{P}_0} \left[ \frac{d\mathbb{P}_{v_1}}{d\mathbb{P}_0} \frac{d\mathbb{P}_{v_2}}{d\mathbb{P}_0}(Z) \right] = \frac{1 + \alpha^2(\sigma^2 + s\rho^2)^{-1}\rho^2 \cdot \langle v_1, v_2 \rangle}{1 - (\sigma^2 + s\rho^2)^{-2}\rho^4 \cdot \langle v_1, v_2 \rangle^2}. \quad (\text{C.10})$$

Meanwhile, for  $0 \leq x < 1/2$  and  $0 \leq k \leq 1$ , we have

$$\frac{1 + kx}{1 - x^2} \leq \cosh(2x) + k \cdot \sinh(2x).$$

Therefore, following from (C.10) with  $s\rho^2 = o(1)$ , we obtain that

$$\mathbb{E}_{\mathbb{P}_0} \left[ \frac{d\mathbb{P}_{v_1}}{d\mathbb{P}_0} \frac{d\mathbb{P}_{v_2}}{d\mathbb{P}_0}(Z) \right] \leq \cosh\left(\frac{2\rho^2 \cdot \langle v_1, v_2 \rangle}{\sigma^2 + s\rho^2}\right) + \alpha^2 \cdot \sinh\left(\frac{2\rho^2 \cdot \langle v_1, v_2 \rangle}{\sigma^2 + s\rho^2}\right), \quad (\text{C.11})$$

which concludes the proof of Lemma B.1.  $\square$

706 *Proof.* In what follows, we establish the upper bound of the following sum,

$$S = \frac{1}{|\mathcal{G}(s)|^2} \sum_{v_1, v_2 \in \mathcal{G}(s)} \left[ \exp\left(\frac{4\alpha^2 \rho^2 \cdot \langle v_1, v_2 \rangle}{\sigma^2 + s\rho^2}\right) \vee \cosh\left(\frac{4\rho^2 \cdot \langle v_1, v_2 \rangle}{\sigma^2 + s\rho^2}\right) \right]^n. \quad (\text{C.12})$$

707 In specific, we show that  $S = 1 + o(1)$  if it holds that

$$\gamma_n = o\left(\sqrt{\frac{s \log d}{n}} \wedge \frac{1}{\alpha^2} \cdot \frac{s \log d}{n}\right).$$

708 The proof strategy is similar to that of Theorem 3.1 by [62]. We define  $\mathcal{V}(s)$  the class of index set as  
709 follows,

$$\mathcal{V}(s) = \{\mathcal{S} \subseteq [d] : |\mathcal{S}| = s\}.$$

710 We further denote by  $\mathcal{S}_1$  and  $\mathcal{S}_2$  two independent random variables, which are uniformly distributed  
711 over  $\mathcal{V}(s)$  and

$$T = |\mathcal{S}_1 \cap \mathcal{S}_2|.$$

712 We obtain from (C.12) the following upper bound of  $S$ ,

$$S \leq \mathbb{E}_T \left[ \left\{ \exp\left(\frac{4\alpha^2 \rho^2 T}{\sigma^2 + s\rho^2}\right) \vee \cosh\left(\frac{4\rho^2 T}{\sigma^2 + s\rho^2}\right) \right\}^n \right]. \quad (\text{C.13})$$

713 Let  $\{\eta_i\}_{i \in [n]}$  be  $n$  independent Rademacher random variables and  $U$  be their sum. Following from  
714 (C.13) and the fact that  $\cosh(x) = \mathbb{E}_{\eta_i}[\exp(\eta_i x)]$ , we obtain

$$\begin{aligned} S &\leq \mathbb{E}_T \left[ \exp\left(\frac{4n\alpha^2 \rho^2 T}{\sigma^2 + s\rho^2}\right) \vee \mathbb{E}_U \left[ \exp\left(\frac{4\rho^2 UT}{\sigma^2 + s\rho^2}\right) \right] \right] \\ &= \mathbb{E}_T \mathbb{E}_U \left[ \exp\left(\frac{4n\alpha^2 \rho^2 T}{\sigma^2 + s\rho^2}\right) \vee \exp\left(\frac{4\rho^2 UT}{\sigma^2 + s\rho^2}\right) \right]. \end{aligned} \quad (\text{C.14})$$

715 We apply Fubini's theorem to calculate the right-hand side of (C.14). We first calculate the expectation  
716 with respect to  $T$ . Recall that we denote by  $T = |\mathcal{S}_1 \cap \mathcal{S}_2|$ . Therefore, it holds that

$$\begin{aligned} &\mathbb{E}_T \left[ \exp\left(\frac{4n\alpha^2 \rho^2 T}{\sigma^2 + s\rho^2}\right) \vee \exp\left(\frac{4\rho^2 UT}{\sigma^2 + s\rho^2}\right) \right] \\ &= \mathbb{E}_T \left[ \left\{ \exp\left(\frac{4n\alpha^2 \rho^2}{\sigma^2 + s\rho^2}\right) \vee \exp\left(\frac{4\rho^2 U}{\sigma^2 + s\rho^2}\right) \right\}^T \right] \\ &\leq \sup_{\mathcal{S} \in \mathcal{V}(s)} \mathbb{E}_{\mathcal{S}_2} \left[ \left\{ \exp\left(\frac{4n\alpha^2 \rho^2}{\sigma^2 + s\rho^2}\right) \vee \exp\left(\frac{4\rho^2 U}{\sigma^2 + s\rho^2}\right) \right\}^{|\mathcal{S} \cap \mathcal{S}_2|} \right], \end{aligned} \quad (\text{C.15})$$

717 where the last inequality holds since  $\mathcal{S}_1$  is uniformly distributed over  $\mathcal{V}(s)$ . We fix an arbitrary  
718  $\mathcal{S} \in \mathcal{V}(s)$  and denote by  $|\mathcal{S} \cap \mathcal{S}_2| = \sum_{i \in \mathcal{V}} v_i$ , where  $\{v_i\}_{i \in \mathcal{V}}$  are random variables that takes value  
719 one if  $i \in \mathcal{S} \cap \mathcal{S}_2$  and zero otherwise. Recall that  $\mathcal{S}_2$  is uniformly distributed over  $\mathcal{C}(s)$ . Therefore,  
720  $v_i$  takes value one with probability  $s/d$  and zero otherwise. Meanwhile, for  $i \neq j$ ,  $v_i$  and  $v_j$  are  
721 negatively associated with each other. Thus, it holds that

$$\begin{aligned} &\mathbb{E}_{\mathcal{S}_2} \left[ \left\{ \exp\left(\frac{4n\alpha^2 \rho^2}{\sigma^2 + s\rho^2}\right) \vee \exp\left(\frac{4\rho^2 U}{\sigma^2 + s\rho^2}\right) \right\}^{|\mathcal{S} \cap \mathcal{S}_2|} \right] \\ &\leq \prod_{i \in \mathcal{V}} \mathbb{E}_{v_i} \left[ \left\{ \exp\left(\frac{4n\alpha^2 \rho^2}{\sigma^2 + s\rho^2}\right) \vee \exp\left(\frac{4\rho^2 U}{\sigma^2 + s\rho^2}\right) \right\}^{v_i} \right] \\ &= \left( s/d \cdot \left[ \exp\left(\frac{4n\alpha^2 \rho^2}{\sigma^2 + s\rho^2}\right) \vee \exp\left(\frac{4\rho^2 U}{\sigma^2 + s\rho^2}\right) \right] + 1 - s/d \right)^s. \end{aligned} \quad (\text{C.16})$$

722 Since the inequality in (C.16) holds for any  $S \in \mathcal{V}(s)$ , it holds for the supreme over  $\mathcal{V}(s)$ . By  
 723 plugging (C.16) into (C.15), we obtain that

$$\begin{aligned} & \mathbb{E}_T \left[ \exp \left( \frac{4n\alpha^2 \rho^2 T}{\sigma^2 + s\rho^2} \right) \vee \exp \left( \frac{4\rho^2 U T}{\sigma^2 + s\rho^2} \right) \right] \\ & \leq 1 + \sum_{k=1}^s \binom{s}{k} \left( \frac{s}{d} \right)^k \cdot \left[ \exp \left( \frac{4n\alpha^2 \rho^2}{\sigma^2 + s\rho^2} \right) \vee \exp \left( \frac{4\rho^2 U}{\sigma^2 + s\rho^2} \right) - 1 \right]^k. \end{aligned} \quad (\text{C.17})$$

724 Finally, by combining (C.14) and (C.17), we obtain from Fubini's theorem that

$$\begin{aligned} S - 1 & \leq \sum_{k=1}^s \binom{s}{k} \left( \frac{s}{d} \right)^k \cdot \mathbb{E}_U \left[ \left\{ \exp \left( \frac{4n\alpha^2 \rho^2}{\sigma^2 + s\rho^2} \right) \vee \exp \left( \frac{4\rho^2 U}{\sigma^2 + s\rho^2} \right) - 1 \right\}^k \right] \\ & \leq \sum_{k=1}^s \binom{s}{k} \left( \frac{s}{d} \right)^k \cdot \left[ \exp \left( \frac{4n\alpha^2 \rho^2}{\sigma^2 + s\rho^2} \right) - 1 \right]^k \\ & \quad + \binom{s}{k} \left( \frac{s}{d} \right)^k \cdot \mathbb{E}_U \left[ \left\{ \exp \left( \frac{4\rho^2 U}{\sigma^2 + s\rho^2} \right) - 1 \right\}^k \middle| U \geq n\alpha^2 \right]. \end{aligned} \quad (\text{C.18})$$

725 It now suffices to show that the right-hand side of (C.18) is of order  $o(1)$ . The following lemma upper  
 726 bounds the first term on the right-hand side of (C.18).

727 **Lemma C.1** ([62]). For  $\gamma_n = s\rho^2/\sigma^2 = o(1/\alpha^2 \cdot s \log d/n)$ , it holds that

$$\sum_{k=1}^s \binom{s}{k} \left( \frac{s}{d} \right)^k \cdot \left[ \exp \left( \frac{4n\alpha^2 \rho^2}{\sigma^2 + s\rho^2} \right) - 1 \right]^k = o(1). \quad (\text{C.19})$$

728 *Proof.* See §C.6 for a detailed proof.  $\square$

729 We denote by  $Q = 4\rho^2 U/(\sigma^2 + s\rho^2)$ . Note that  $\exp(x) - 1 \leq 2x$  for  $0 < x < 1$ . Therefore, the  
 730 following upper bound of the second term on the right-hand side of (C.18) holds,

$$\begin{aligned} & \sum_{k=1}^s \binom{s}{k} \left( \frac{s}{d} \right)^k \cdot \mathbb{E}_U \left[ \left\{ \exp \left( \frac{4\rho^2 U}{\sigma^2 + s\rho^2} \right) - 1 \right\}^k \middle| U \geq 0 \right] \\ & \leq \sum_{k=1}^s \left( \frac{s^2 e}{kd} \right)^k \cdot \mathbb{E}_U [(2|Q|)^k + \exp(k|Q|) \cdot \mathbf{1}\{|Q| \geq 1\}] \\ & \leq \underbrace{\sum_{k=1}^s \mathbb{E}_U \left[ \frac{2s^2 e |Q|}{kd} \right]^k}_{(i)} + \underbrace{\sum_{k=1}^s \left( \frac{s^2 e}{kd} \right)^k \cdot \mathbb{E}_U [\exp(k|Q|) \cdot \mathbf{1}\{|Q| \geq 1\}]}_{(ii)}. \end{aligned} \quad (\text{C.20})$$

731 The following Lemma establishes the upper bounds of terms (i) and (ii) in (C.20).

732 **Lemma C.2** ([62]). For  $\gamma_n = s\rho^2/\sigma^2 = o(\sqrt{s \log d/n})$ , it holds that

$$\begin{aligned} T_1 & = \sum_{k=1}^s \mathbb{E}_U \left[ \frac{2s^2 e |Q|}{kd} \right]^k = o(1), \\ T_2 & = \sum_{k=1}^s \left( \frac{s^2 e}{kd} \right)^k \cdot \mathbb{E}_U [\exp(k|Q|) \cdot \mathbf{1}\{|Q| \geq 1\}] = o(1). \end{aligned} \quad (\text{C.21})$$

733 *Proof.* See §C.7 for a detailed proof.  $\square$

734 By combining (C.18) and (C.20), we obtain from Lemmas C.1 and C.2 that  $S - 1 = o(1)$  for

$$\gamma_n = o \left( \sqrt{\frac{s \log d}{n}} \wedge \frac{1}{\alpha^2} \cdot \frac{s \log d}{n} \right),$$

735 which concludes the proof of Lemma B.3.  $\square$

737 *Proof.* In what follows, we prove that  $T \cdot \sup_{q \in \mathcal{Q}} |\mathcal{C}(q)|/|\mathcal{G}(s)| = o(1)$  under the assumptions of  
 738 Lemma B.4. Our proof strategy is similar to that of Theorem 5.3 by [53]. As  $|\mathcal{G}(s)|$  is given, we focus  
 739 on upper bounding  $|\mathcal{C}(q)|$ . We first partition  $\mathcal{C}(q)$  into two parts, namely,  $\mathcal{C}_1(q)$  and  $\mathcal{C}_2(q)$ , where

$$\mathcal{C}_1(q) = \left\{ v \in \mathcal{G}(s) : \mathbb{E}_{\mathbb{P}_0}[q(Z)] - \mathbb{E}_{\mathbb{P}_v}[q(Z)] > \tau_q \right\},$$

740 and  $\mathcal{C}_2(q) = \mathcal{C}(q) \setminus \mathcal{C}_1(q)$ . It holds that

$$\sup_{q \in \mathcal{Q}} |\mathcal{C}(q)| \leq \sup_{q \in \mathcal{Q}} |\mathcal{C}_1(q)| + \sup_{q \in \mathcal{Q}} |\mathcal{C}_2(q)|. \quad (\text{C.22})$$

741 We introduce the following distributions,

$$\mathbb{P}_{\mathcal{C}_1(q)} = \frac{1}{|\mathcal{C}_1(q)|} \sum_{v \in \mathcal{C}_1(q)} \mathbb{P}_v, \quad \mathbb{P}_{\mathcal{C}_2(q)} = \frac{1}{|\mathcal{C}_2(q)|} \sum_{v \in \mathcal{C}_2(q)} \mathbb{P}_v.$$

742 We further denote by

$$\bar{\mathcal{C}}_\ell(q, v) = \operatorname{argmax}_{\mathcal{C}} \left\{ \frac{1}{|\mathcal{C}|} \sum_{v' \in \mathcal{C}} \mathbb{E}_{\mathbb{P}_0} \left[ \frac{d\mathbb{P}_v}{d\mathbb{P}_0} \frac{d\mathbb{P}_{v'}}{d\mathbb{P}_0}(X) \right] - 1 \mid |\mathcal{C}| = |\mathcal{C}_\ell(q)| \right\} \subseteq \mathcal{G}(s) \quad (\text{C.23})$$

743 for  $\ell \in \{1, 2\}$ . It then holds that

$$\begin{aligned} D_{\chi^2}(\mathbb{P}_{\mathcal{C}_\ell(q)}, \mathbb{P}_0) &= \mathbb{E}_{\mathbb{P}_0} \left[ \left( \frac{d\mathbb{P}_{\mathcal{C}_\ell(q)}}{d\mathbb{P}_0}(Z) - 1 \right)^2 \right] = \frac{1}{|\mathcal{C}_\ell(q)|} \sum_{v, v' \in \mathcal{C}_\ell(q)} \mathbb{E}_{\mathbb{P}_0} \left[ \frac{d\mathbb{P}_v}{d\mathbb{P}_0} \frac{d\mathbb{P}_{v'}}{d\mathbb{P}_0}(Z) \right] - 1 \\ &\leq \sup_{v \in \mathcal{C}_\ell(q)} \frac{1}{|\mathcal{C}_\ell(q)|} \sum_{v' \in \mathcal{C}_\ell(q)} \mathbb{E}_{\mathbb{P}_0} \left[ \frac{d\mathbb{P}_v}{d\mathbb{P}_0} \frac{d\mathbb{P}_{v'}}{d\mathbb{P}_0}(Z) \right] - 1 \\ &\leq \sup_{v \in \mathcal{C}_\ell(q)} \frac{1}{|\mathcal{C}_\ell(q)|} \sum_{v' \in \bar{\mathcal{C}}_\ell(q, v)} \mathbb{E}_{\mathbb{P}_0} \left[ \frac{d\mathbb{P}_v}{d\mathbb{P}_0} \frac{d\mathbb{P}_{v'}}{d\mathbb{P}_0}(Z) \right] - 1, \end{aligned} \quad (\text{C.24})$$

744 where the last inequality follows from the definition of  $\bar{\mathcal{C}}_\ell(q, v)$  in (C.23). By Lemma B.1, it holds  
 745 that

$$\mathbb{E}_{\mathbb{P}_0} \left[ \frac{d\mathbb{P}_v}{d\mathbb{P}_0} \frac{d\mathbb{P}_{v'}}{d\mathbb{P}_0}(Z) \right] \leq \cosh \left( \frac{2\rho^2 \cdot \langle v, v' \rangle}{\sigma^2 + s\rho^2} \right) + \alpha^2 \cdot \sinh \left( \frac{2\rho^2 \cdot \langle v, v' \rangle}{\sigma^2 + s\rho^2} \right). \quad (\text{C.25})$$

746 Combining (C.24) and (C.25), we conclude that

$$\begin{aligned} 1 + D_{\chi^2}(\mathbb{P}_{\mathcal{C}_\ell(q)}, \mathbb{P}_0) &\leq \sup_{v \in \mathcal{C}_\ell(q)} \left\{ \frac{1}{|\mathcal{C}_\ell(q)|} \sum_{v' \in \bar{\mathcal{C}}_\ell(q, v)} \cosh \left( \frac{2\rho^2 \cdot \langle v, v' \rangle}{\sigma^2 + s\rho^2} \right) + \alpha^2 \cdot \sinh \left( \frac{2\rho^2 \cdot \langle v, v' \rangle}{\sigma^2 + s\rho^2} \right) \right\}. \end{aligned} \quad (\text{C.26})$$

747 In what follows, we calculate the sum on the right-hand side of (C.26). To achieve this, we calculate  
 748 the sum based on the value of  $\langle v, v' \rangle$ . We denote by

$$\mathcal{C}_j(v) = \{ v' \in \mathcal{G}(s) : \langle v, v' \rangle = s - j \}.$$

749 Then for any choice of  $\ell$ ,  $q$ , and  $v \in \mathcal{C}_\ell(q)$ , there exists an integer  $k_\ell(q, v)$  such that

$$\bar{\mathcal{C}}_\ell(q, v) = \mathcal{C}_0(v) \cup \dots \cup \mathcal{C}_{k_\ell(q, v)-1}(v) \cup \mathcal{C}'_\ell(q, v),$$

750 where  $\mathcal{C}'_\ell(q, v) = \bar{\mathcal{C}}_\ell(q, v) \setminus \bigcup_{j=0}^{k_\ell(q, v)-1} \mathcal{C}_j(v)$ . Note that we have

$$|\mathcal{C}'_\ell(q, v)| = |\mathcal{C}_\ell(q)| - \sum_{j=0}^{k_\ell(q, v)-1} |\mathcal{C}_j(v)| < |\mathcal{C}_{k_\ell(q, v)}(v)|.$$

751 Hence, the cardinality of  $\bar{\mathcal{C}}_\ell(q, v)$  is between  $\sum_{j=0}^{k_\ell(q, v)-1} |\mathcal{C}_j(v)|$  and  $\sum_{j=0}^{k_\ell(q, v)} |\mathcal{C}_j(v)|$ . Following  
 752 form (C.26), we have

$$1 + D_{\chi^2}(\mathbb{P}_{\mathcal{C}_\ell(q)}, \mathbb{P}_0) \leq \frac{\sum_{j=0}^{k_\ell(q, v)-1} h_\alpha(j) \cdot |\mathcal{C}_j(v)| + h_\alpha(k_\ell(q, v)) \cdot |\mathcal{C}'_\ell(q, v)|}{\sum_{j=0}^{k_\ell(q, v)-1} |\mathcal{C}_j(v)| + |\mathcal{C}'_\ell(q, v)|}, \quad (\text{C.27})$$



753 where we denote by  $h_\alpha(j)$  the right-hand side of (C.25) when  $v' \in \mathcal{C}_j(v)$ . In other words, it holds  
 754 that

$$h_\alpha(j) = \cosh\left(\frac{2\rho^2(s-j)}{\sigma^2 + s\rho^2}\right) + \alpha^2 \cdot \sinh\left(\frac{2\rho^2(s-j)}{\sigma^2 + s\rho^2}\right). \quad (\text{C.28})$$

755 Note that  $h_\alpha(j)$  is monotonically decreasing as  $j$  increases. Therefore, it follows from (C.27) that

$$1 + D_{\chi^2}(\mathbb{P}_{\mathcal{C}_\ell(q)}, \mathbb{P}_0) \leq \frac{\sum_{j=0}^{k_\ell(q,v)-1} h_\alpha(j) \cdot |\mathcal{C}_j(v)|}{\sum_{j=0}^{k_\ell(q,v)-1} |\mathcal{C}_j(v)|}. \quad (\text{C.29})$$

756 Further note that  $|\mathcal{C}_j(v)| = \binom{s}{s-j} \binom{d-s}{j}$ . Therefore, it holds that

$$|\mathcal{C}_{j+1}(v)|/|\mathcal{C}_j(v)| = (s-j)(d-s-j)/(j+1)^2 \geq d/2s^2,$$

757 where  $j \in \{0, \dots, s-1\}$ ,  $v \in \mathcal{G}(s)$ , and  $s = o(d^{1/2-\delta})$ . We denote by  $\zeta = d/2s^2$ , which satisfies

758  $\zeta^{-1} = o(1)$  by the assumption that  $s = o(d^{1/2-\delta})$ . It then holds that

$$\begin{aligned} |\mathcal{C}_\ell(q)| &\leq \sum_{j=0}^{k_\ell(q,v)} |\mathcal{C}_j(v)| \leq |\mathcal{C}_s(v)| \cdot \sum_{j=0}^{k_\ell(q,v)} \zeta^{j-s} \\ &\leq \frac{\zeta^{-(s-k_\ell(q,v))} \cdot |\mathcal{G}(s)|}{1 - \zeta^{-1}} \leq 2\zeta^{-(s-k_\ell(q,v))} \cdot |\mathcal{G}(s)|. \end{aligned} \quad (\text{C.30})$$

759 For any integer  $k \geq 1$  and two positive sequences  $\{w_i\}_{i=0}^\infty$  and  $\{u_i\}_{i=0}^\infty$  such that  $w_i/w_{i-1} \geq$   
 760  $u_i/u_{i-1} > 1$ , it holds that

$$\frac{\sum_{j=0}^k w_j \cdot h_\alpha(j)}{\sum_{i=0}^k w_i} \leq \frac{\sum_{j=0}^k u_j \cdot h_\alpha(j)}{\sum_{i=0}^k u_i}. \quad (\text{C.31})$$

761 Therefore, by setting  $w_j = |\mathcal{C}_j(v)|$  and  $u_j = \zeta^j$ , we conclude from (C.29) and (C.31) that

$$\begin{aligned} 1 + D_{\chi^2}(\mathbb{P}_{\mathcal{C}_\ell(q)}, \mathbb{P}_0) &\leq \frac{\sum_{j=0}^{k_\ell(q,v)-1} \zeta^j \cdot h_\alpha(j)}{\sum_{j=0}^{k_\ell(q,v)-1} \zeta^j} \\ &= \left[ \sum_{j=0}^{k_\ell(q,v)-1} \zeta^j \cdot \cosh\left(\frac{2\rho^2(s-j)}{\sigma^2 + s\rho^2}\right) + \alpha^2 \cdot \sinh\left(\frac{2\rho^2(s-j)}{\sigma^2 + s\rho^2}\right) \right] / \sum_{j=0}^{k_\ell(q,v)-1} \zeta^j \\ &\leq \sum_{j=0}^{k_\ell(q,v)-1} \zeta^j \cdot \left\{ \cosh\left(\frac{4\rho^2(s-j)}{\sigma^2 + s\rho^2}\right) \vee \exp\left(\frac{4\alpha^2\rho^2(s-j)}{\sigma^2 + s\rho^2}\right) \right\} / \sum_{j=0}^{k_\ell(q,v)-1} \zeta^j, \end{aligned} \quad (\text{C.32})$$

762 where the last inequality follows from Lemma B.1. In what follows, we denote by

$$f(j) = \cosh\left(\frac{4\rho^2(s-j)}{\sigma^2 + s\rho^2}\right), \quad g(j) = \exp\left(\frac{4\alpha^2\rho^2(s-j)}{\sigma^2 + s\rho^2}\right) \quad (\text{C.33})$$

763 for notational simplicity. Note that

$$f(j-1)/f(j) \geq \cosh\left(\frac{4\rho^2}{\sigma^2 + s\rho^2}\right).$$

764 Therefore, it holds for  $j \in \{0, 1, \dots, k_\ell(q, v) - 1\}$  that

$$f(j) \leq f(k_\ell(q, v) - 1) \cdot \left\{ \cosh\left(\frac{4\rho^2}{\sigma^2 + s\rho^2}\right) \right\}^{k_\ell(q, v) - j - 1}. \quad (\text{C.34})$$

765 Meanwhile, we have

$$g(j) = \exp(4\alpha^2\rho^2(s-j)\sigma^2 + s\rho^2) = g(k_\ell(q, v) - 1) \cdot \left\{ \exp\left(\frac{4\alpha^2\rho^2}{\sigma^2 + s\rho^2}\right) \right\}^{k_\ell(q, v) - j - 1}. \quad (\text{C.35})$$

766 We denote by

$$\Gamma(s, \rho) = \exp\left(\frac{4\alpha^2\rho^2}{\sigma^2 + s\rho^2}\right) \vee \cosh\left(\frac{4\rho^2}{\sigma^2 + s\rho^2}\right). \quad (\text{C.36})$$

767 Combining (C.34) and (C.35), we conclude that

$$f(j) \vee g(j) \leq \left\{ f(k_\ell(q, v) - 1) \vee g(k_\ell(q, v) - 1) \right\} \cdot (\Gamma(s, \rho))^{k_\ell(q, v) - j - 1}. \quad (\text{C.37})$$

768 Following from (C.32) and (C.37), it holds that

$$1 + D_{\chi^2}(\mathbb{P}_{\mathcal{C}_\ell(q)}, \mathbb{P}_0) \leq \left\{ f(k_\ell(q, v) - 1) \vee g(k_\ell(q, v) - 1) \right\} \cdot \frac{\sum_{j=0}^{k_\ell(q, v)-1} \zeta^j \cdot (\Gamma(s, \rho))^{k_\ell(q, v)-j-1}}{\sum_{j=0}^{k_\ell(q, v)-1} \zeta^j}. \quad (\text{C.38})$$

769 By direct calculation, we obtain

$$\begin{aligned} \frac{\sum_{j=0}^{k_\ell(q, v)-1} \zeta^j \cdot (\Gamma(s, \rho))^{k_\ell(q, v)-j-1}}{\sum_{j=0}^{k_\ell(q, v)-1} \zeta^j} &= \frac{\zeta^{k_\ell(q, v)-1} \cdot \sum_{j=0}^{k_\ell(q, v)-1} (\Gamma(s, \rho)/\zeta)^{k_\ell(q, v)-j-1}}{\zeta^{k_\ell(q, v)-1} \cdot \sum_{j=0}^{k_\ell(q, v)-1} \zeta^{-(k_\ell(q, v)-j-1)}} \\ &= \frac{1 - (\Gamma(s, \rho)/\zeta)^{k_\ell(q, v)}}{1 - \zeta^{-k_\ell(q, v)}} \cdot \frac{1 - \zeta^{-1}}{1 - \Gamma(s, \rho)/\zeta}. \end{aligned} \quad (\text{C.39})$$

770 Note that  $\Gamma(s, \rho) \geq 1$ . Therefore, the following upper bound of the right-hand side of (C.39) holds,

$$\frac{1 - (\Gamma(s, \rho)/\zeta)^{k_\ell(q, v)}}{1 - \zeta^{-k_\ell(q, v)}} \cdot \frac{1 - \zeta^{-1}}{1 - \Gamma(s, \rho)/\zeta} \leq \frac{1 - \zeta^{-1}}{1 - \Gamma(s, \rho)/\zeta}. \quad (\text{C.40})$$

771 Combining (C.38), (C.39), and (C.40), we conclude that

$$1 + D_{\chi^2}(\mathbb{P}_{\mathcal{C}_\ell(q)}, \mathbb{P}_0) \leq \left\{ f(k_\ell(q, v) - 1) \vee g(k_\ell(q, v) - 1) \right\} \cdot \frac{1 - \zeta^{-1}}{1 - \Gamma(s, \rho)/\zeta}, \quad (\text{C.41})$$

772 where  $f(j)$  and  $g(j)$  are defined in (C.33). Meanwhile, by Lemma 4.5 of [53], it holds that

$$D_{\chi^2}(\mathbb{P}_{\mathcal{C}_\ell(q)}, \mathbb{P}_0) \geq \log(T/\xi)/n. \quad (\text{C.42})$$

773 We denote by  $\tau^2$  the right-hand side of (C.42). Combining (C.41) and (C.42), we have

$$\tau^2 + 1 \leq \left\{ f(k_\ell(q, v) - 1) \vee g(k_\ell(q, v) - 1) \right\} \cdot \frac{1 - \zeta^{-1}}{1 - \Gamma(s, \rho)/\zeta}.$$

774 Therefore, one of the following inequalities holds,

$$\begin{aligned} (1 + \tau^2) \cdot \frac{1 - \Gamma(s, \rho)/\zeta}{1 - \zeta^{-1}} &\leq g(k_\ell(q, v) - 1) = \exp\left(\frac{4\alpha^2\rho^2 \cdot (s - k_\ell(q, v) + 1)}{\sigma^2 + s\rho^2}\right), \\ (1 + \tau^2) \cdot \frac{1 - \Gamma(s, \rho)/\zeta}{1 - \zeta^{-1}} &\leq f(k_\ell(q, v) - 1) \leq \exp\left(\frac{2\rho^4 \cdot (s - k_\ell(q, v) + 1)^2}{(\sigma^2 + s\rho^2)^2}\right), \end{aligned} \quad (\text{C.43})$$

775 where the second inequality holds because of the fact that  $\cosh(x) \leq \exp(x^2/2)$ . We take the  
776 logarithm of (C.43) and obtain that one of the following inequalities holds,

$$\begin{aligned} \log(1 + \tau^2) + \log\left(\frac{1 - \zeta^{-1}}{1 - \Gamma(s, \rho)/\zeta}\right) &\leq \frac{4\alpha^2\rho^2 \cdot (s - k_\ell(q, v) + 1)}{\sigma^2 + s\rho^2}, \\ \log(1 + \tau^2) + \log\left(\frac{1 - \zeta^{-1}}{1 - \Gamma(s, \rho)/\zeta}\right) &\leq \frac{2\rho^4 \cdot (s - k_\ell(q, v) + 1)^2}{(\sigma^2 + s\rho^2)^2}. \end{aligned} \quad (\text{C.44})$$

777 Following from the definition of  $\Gamma(s, \rho)$  in (C.36), we have  $\Gamma(s, \rho)/\zeta = o(1)$ . By Taylor's expansion,  
778 it holds that

$$\log\left(\frac{1 - \zeta^{-1}}{1 - \Gamma(s, \rho)/\zeta}\right) = \log\left(1 - \zeta^{-1} \cdot \frac{1 - \Gamma(s, \rho)}{1 - \Gamma(s, \rho)/\zeta}\right) = O(\zeta^{-1}\rho^4 \vee \zeta^{-1}\alpha^2\rho^2). \quad (\text{C.45})$$

779 For  $\gamma_n = s\rho^2/\delta^2 = o(\sqrt{s^2/n} \wedge 1/\alpha^2 \cdot s/n)$ , where  $\sigma^2$  is a constant, it holds that  $\alpha^2\rho^2 \vee \rho^4 = o(1/n)$ .

780 Hence, the right-hand side of (C.45) is negligible compared with  $\log(1 + \tau^2)$ . Then following from  
781 (C.44), it holds that

$$s - k_\ell(q, v) + 1 \geq \sqrt{\frac{(\sigma^2 + s\rho^2)^2 \cdot \log(1 + \tau^2)}{2\rho^4}} \bigwedge \sqrt{\frac{(\sigma^2 + s\rho^2) \cdot \log(1 + \tau^2)}{4\alpha^2\rho^2}}. \quad (\text{C.46})$$

782 Note that  $\log(1 + \tau^2) \geq \tau^2/2 = \log(T/\xi)/(2n)$  for  $\tau < 1$ . Therefore, by combining (C.30) and  
 783 (C.46), we conclude that

$$T \cdot \frac{\sup_{q \in \mathcal{Q}} |\mathcal{C}(q)|}{|\mathcal{G}(s)|} \leq 4T \cdot \exp \left( -\log \zeta \cdot \left\{ \sqrt{\frac{(\sigma^2 + s\rho^2)^2 \cdot \log(T/\xi)}{4n\rho^4}} - 1 \vee \sqrt{\frac{(\sigma^2 + s\rho^2) \cdot \log(T/\xi)}{8n\alpha^2\rho^2}} - 1 \right\} \right). \quad (\text{C.47})$$

784 Note that  $\rho^4 \cdot n \vee \alpha^2 \rho^2 \cdot n = o(1)$  for  $s\rho^2/\sigma^2 = o(\sqrt{s^2/n} \wedge 1/\alpha^2 \cdot s/n)$ . We choose an absolute  
 785 constant  $C > 0$  satisfying  $\delta(C-1) > \mu$ , where  $\mu$  and  $\delta$  are absolute constants such that  $T = O(d^\mu)$   
 786 and  $s = o(d^{1/2-\delta})$ . Then it holds for a sufficiently large  $n$  that

$$\begin{aligned} & \sqrt{\frac{(\sigma^2 + s\rho^2)^2 \cdot \log(T/\xi)}{4n\rho^4}} \vee \sqrt{\frac{(\sigma^2 + s\rho^2) \cdot \log(T/\xi)}{8n\alpha^2\rho^2}} \\ & \geq \sqrt{\frac{(\sigma^2 + s\rho^2)^2 \cdot \log(1/\xi)}{4n\rho^4}} \vee \sqrt{\frac{(\sigma^2 + s\rho^2) \cdot \log(1/\xi)}{8n\alpha^2\rho^2}} \geq C. \end{aligned} \quad (\text{C.48})$$

787 Note that  $\zeta = d/(2s^2) = \Omega(d^\delta)$  for  $s = o(d^{1/2-\delta})$ , where  $\delta > 0$  is an absolute constant. Finally,  
 788 combining (C.47) and (C.48), we obtain that for  $T = O(d^\mu)$ ,

$$T \cdot \sup_{q \in \mathcal{Q}} |\mathcal{C}(q)|/|\mathcal{G}(s)| \leq \mathcal{O}(d^\mu \cdot \zeta^{-(C-1)}) = \mathcal{O}(d^{\mu-\delta(C-1)}) = o(1), \quad (\text{C.49})$$

789 which concludes the proof of Lemma B.4.  $\square$

#### 790 C.4 Proof of Lemma B.5

791 *Proof.* In the following proof, we denote by  $C$  and  $C'$  absolute constants, the value of which may  
 792 vary from lines to lines. We define the following unbounded query functions,

$$\begin{aligned} \tilde{q}_{1,v}(Y, X) &= \psi(Y) \cdot [s^{-1}(\mathbf{v}^\top X)^2 - 1] \cdot \mathbb{1}\{|\psi(Y)| \leq (R \cdot \log n)^{1/\nu}\}, \quad \mathbf{v} \in \bar{\mathcal{G}}(s), \\ \tilde{q}_{2,v}(Y, X) &= Y \cdot (s^{-1/2}\mathbf{v}^\top X) \cdot \mathbb{1}\{|Y| \leq (R \cdot \log n)^{1/\nu}\}, \quad \mathbf{v} \in \bar{\mathcal{G}}(s). \end{aligned} \quad (\text{C.50})$$

793 In the sequel, we first upper bound the difference between the query functions in (A.5) and the query  
 794 functions in (C.50). We then characterize the two expectations  $\mathbb{E}_{\mathbb{P}_v}[q_{i,v}(Y, X)]$  and  $\mathbb{E}_{\mathbb{P}_0}[q_{i,v}(Y, X)]$   
 795 using the corresponding expectations of  $\tilde{q}_{i,v}(Y, X)$ . Following from (A.5) and (C.50), it holds that

$$\begin{aligned} \tilde{q}_{1,v} - q_{1,v} &= \psi(Y) \cdot [s^{-1}(\mathbf{v}^\top X)^2 - 1] \cdot \mathbb{1}\{|\psi(Y)| \leq (R \cdot \log n)^{1/\nu}\} \cdot \mathbb{1}\{|\mathbf{v}^\top X| > R \cdot \sqrt{s \log n}\}, \\ \tilde{q}_{2,v} - q_{2,v} &= Y \cdot (s^{-1/2}\mathbf{v}^\top X) \cdot \mathbb{1}\{|Y| \leq (R \cdot \log n)^{1/\nu}\} \cdot \mathbb{1}\{|\mathbf{v}^\top X| > R \cdot \sqrt{s \log n}\}. \end{aligned} \quad (\text{C.51})$$

796 Then following from the Cauchy-Schwartz inequality, it holds for  $q_{1,v}$  and  $\tilde{q}_{1,v}$  that

$$\begin{aligned} & |\mathbb{E}_{\mathbb{P}_0}[q_{1,v}(Y, X) - \tilde{q}_{1,v}(Y, X)]|^2 \\ & \leq \left| \mathbb{E}_{\mathbb{P}_0}[\psi(Y) \cdot (s^{-1}(\mathbf{v}^\top X)^2 - 1)] \right|^2 \cdot \mathbb{P}_0(|\mathbf{v}^\top X| > R \cdot \sqrt{s \log n}). \end{aligned} \quad (\text{C.52})$$

797 Note that under  $H_0$ ,  $X \sim N(0, I_d)$  is the standard Gaussian distribution, which is independent of  $Y$ .  
 798 Therefore, it holds that  $\mathbb{E}_{\mathbb{P}_0}[(s^{-1}(X^\top \mathbf{v})^2 - 1)^2] = 2$ . Then following from the Cauchy-Schwartz  
 799 inequality, we obtain that

$$\begin{aligned} & \left| \mathbb{E}_{\mathbb{P}_0}[\psi(Y) \cdot (s^{-1}(\mathbf{v}^\top X)^2 - 1)] \right|^2 \cdot \mathbb{P}_0(|\mathbf{v}^\top X| > R \cdot \sqrt{s \log n}) \\ & \leq \mathbb{E}_{\mathbb{P}_0}[\psi^2(Y)] \cdot \mathbb{E}_{\mathbb{P}_0}[(s^{-1}(X^\top \mathbf{v})^2 - 1)^2] \cdot \mathbb{P}_0(|\mathbf{v}^\top X| > R \cdot \sqrt{s \log n}) \\ & = C \cdot \mathbb{P}_0(|\mathbf{v}^\top X| > R \cdot \sqrt{s \log n}) \end{aligned} \quad (\text{C.53})$$

800 for a positive absolute constant  $C$ . Note that  $X^\top \mathbf{v}/\sqrt{s} \sim N(0, 1)$  under the null hypothesis.  
 801 Following from the tail bound of standard Gaussian distribution, it holds for any  $t \geq 1$  that

$$\mathbb{P}_0(|X^\top \mathbf{v}/\sqrt{s}| \geq t) \leq 2 \exp(-t^2/2). \quad (\text{C.54})$$

802 Combining (C.52), (C.53), and (C.54), we obtain that

$$\begin{aligned} & |\mathbb{E}_{\mathbb{P}_0}[q_{1,v}(Y, X) - \tilde{q}_{1,v}(Y, X)]|^2 \leq C \cdot \mathbb{P}(|\mathbf{v}^\top X| > R \cdot \sqrt{s \log n}) \\ & \leq C \cdot \exp(-R^2 \cdot \log n/2). \end{aligned} \quad (\text{C.55})$$

803 In the following, we upper bound the distance between  $q_{1,v}(Y, X)$  and  $\tilde{q}_{1,v}(Y, X)$  under  $\mathbb{P}_v$ . Follow-  
 804 ing from the Cauchy-Schwartz inequality, it holds that

$$\begin{aligned} & |\mathbb{E}_{\mathbb{P}_{v^*}} [q_{1,v}(Y, X) - \tilde{q}_{1,v}(Y, X)]|^2 \\ & \leq \mathbb{E}_{\mathbb{P}_{v^*}} [\psi^2(Y) \cdot (s^{-1}(v^\top X)^2 - 1)^2] \cdot \mathbb{P}_{v^*}(|v^\top X| > R \cdot \sqrt{s \log n}) \\ & \leq \sqrt{\mathbb{E}_{\mathbb{P}_{v^*}} [\psi^4(Y)] \cdot \mathbb{E}_{\mathbb{P}_{v^*}} [(s^{-1}(v^\top X)^2 - 1)^4]} \cdot \mathbb{P}_{v^*}(|v^\top X| > R \cdot \sqrt{s \log n}). \end{aligned} \quad (\text{C.56})$$

805 Note that under Assumption A.1,  $\mathbb{E}_{\mathbb{P}_{v^*}} [\psi^4(Y)]$  is upper bounded. Meanwhile, we have that  
 806  $X^\top v / \sqrt{s} \sim N(0, 1)$ . Therefore, it holds for an absolute constant  $C$  that

$$|\mathbb{E}_{\mathbb{P}_{v^*}} [q_{1,v}(Y, X) - \tilde{q}_{1,v}(Y, X)]|^2 \leq C \cdot \exp(-R^2 \cdot \log n / 2). \quad (\text{C.57})$$

807 Similar arguments apply to  $q_{2,v}(Y, X)$  and  $\tilde{q}_{2,v}(Y, X)$ . Under the null hypothesis, it holds for an  
 808 absolute constant  $C'$  that

$$\begin{aligned} |\mathbb{E}_{\mathbb{P}_0} [q_{2,v}(Y, X) - \tilde{q}_{2,v}(Y, X)]|^2 & \leq \mathbb{E}_{\mathbb{P}_0} [Y^2] \cdot \mathbb{E}_{\mathbb{P}_0} [s^{-1}(X^\top v)^2] \cdot \mathbb{P}(|v^\top X| > R \cdot \sqrt{s \log n}) \\ & \leq C' \cdot \exp(-R^2 \cdot \log n / 2), \end{aligned} \quad (\text{C.58})$$

809 which also holds under the alternative hypothesis with distribution  $\mathbb{P}_{v^*}$ . Therefore, following from  
 810 (C.55), (C.57), and (C.58), it holds for a sufficiently large constant  $R$  that

$$\begin{aligned} |\mathbb{E}_{\mathbb{P}_{v^*}} [q_{1,v}(Y, X) - \tilde{q}_{1,v}(Y, X)]| & \vee |\mathbb{E}_{\mathbb{P}_0} [q_{1,v}(Y, X) - \tilde{q}_{1,v}(Y, X)]| \leq 1/n, \\ |\mathbb{E}_{\mathbb{P}_{v^*}} [q_{2,v}(Y, X) - \tilde{q}_{2,v}(Y, X)]| & \vee |\mathbb{E}_{\mathbb{P}_0} [q_{2,v}(Y, X) - \tilde{q}_{2,v}(Y, X)]| \leq 1/n, \end{aligned} \quad (\text{C.59})$$

811 which holds for any  $v \in \bar{\mathcal{G}}(s)$ . In what follows, we characterize the expectations of  $\tilde{q}_{i,v}(Y, X)$  under  
 812 the null and alternative hypotheses for  $i \in \{1, 2\}$ . We then obtain the desired bounds of  $q_{i,v}(Y, X)$   
 813 based on  $\tilde{q}_{i,v}(Y, X)$ . Note that under the null hypothesis,  $Y$  is independent of  $X$ . Then, following  
 814 from (C.50) and the fact that  $X \sim N(0, I_d)$ , it holds that

$$\mathbb{E}_{\mathbb{P}_0} [\tilde{q}_{1,v}(Y, X)] = \mathbb{E}_{\mathbb{P}_0} [\tilde{q}_{2,v}(Y, X)] = 0. \quad (\text{C.60})$$

815 Following from (A.3), we have

$$\begin{aligned} s\rho^2 - \mathbb{E}_{\mathbb{P}_{v^*}} [\tilde{q}_{1,v^*}(Y, X)] & \leq \mathbb{E}_{\mathbb{P}_{v^*}} [\psi(Y) \cdot (s^{-1}(v^{*\top} X)^2 - 1) - \tilde{q}_{1,v}(Y, X)] \\ & = \mathbb{E}_{\mathbb{P}_{v^*}} [\psi(Y) \cdot (s^{-1}(v^{*\top} X)^2 - 1) \cdot \mathbb{1}\{|\psi(Y)| > (R \cdot \log n)^{1/\nu}\}] \\ & \leq \sqrt{\mathbb{E}_{\mathbb{P}_{v^*}} [\psi^2(Y) \cdot (s^{-1}(v^{*\top} X)^2 - 1)^2]} \cdot \sqrt{\mathbb{P}_{v^*}(|\psi(Y)| > (R \cdot \log n)^{1/\nu})}, \end{aligned} \quad (\text{C.61})$$

816 where the last inequality follows from the Cauchy-Schwartz inequality. It then follows from Assump-  
 817 tion A.1 that

$$\mathbb{P}_{v^*}(|\psi(Y)| > (R \cdot \log n)^{1/\nu}) \leq C \cdot \exp(-R \cdot \log n). \quad (\text{C.62})$$

818 Meanwhile, following from the Cauchy-Schwartz inequality, it holds that

$$\mathbb{E}_{\mathbb{P}_{v^*}} [\psi^2(Y) \cdot (s^{-1}(v^{*\top} X)^2 - 1)^2] \leq \sqrt{\mathbb{E}_{\mathbb{P}_{v^*}} [\psi^4(Y)] \cdot \mathbb{E}_{\mathbb{P}_{v^*}} [(s^{-1}(v^{*\top} X)^2 - 1)^4]}, \quad (\text{C.63})$$

819 which is upper bounded by an absolute constant. Combining (C.61), (C.62), and (C.63), if it holds that  
 820  $s\rho^2/\sigma^2 = \Omega(\sqrt{s \log d/n})$ , then for sufficiently large  $n$  and constant  $R$ , we obtain that  $1/n \leq s\rho^2/4$   
 821 and

$$s\rho^2 - \mathbb{E}_{\mathbb{P}_{v^*}} [\tilde{q}_{1,v}(Y, X)] \leq s\rho^2/4. \quad (\text{C.64})$$

822 In other words, it holds that  $\mathbb{E}_{\mathbb{P}_{v^*}} [\tilde{q}_{1,v}(Y, X)] \geq 3s\rho^2/4$ . Similar arguments hold for the query  
 823 function  $\tilde{q}_{2,v}(Y, X)$ . If it holds that  $s\rho^2/\sigma^2 = \Omega(1/\alpha^2 \cdot s \log d/n)$ , then for sufficiently large  $n$  and  
 824 constant  $R$ , we obtain that  $1/n \leq \sqrt{\alpha^2 s\rho^2}/4$  and

$$\mathbb{E}_{\mathbb{P}_{v^*}} [\tilde{q}_{2,v}(Y, X)] \geq 3\sqrt{\alpha^2 s\rho^2}/4. \quad (\text{C.65})$$

825 Combining (C.59), (C.60), (C.64), and (C.65), it holds for sufficiently large  $n$  and constant  $R$  that

$$\mathbb{E}_{\mathbb{P}_0} [q_{1,v}(Y, X)] \leq 1/n, \quad \mathbb{E}_{\mathbb{P}_0} [q_{2,v}(Y, X)] \leq 1/n.$$

826 Furthermore, it holds for sufficiently large  $n$  and constant  $R$  that

$$\begin{aligned} \mathbb{E}_{\mathbb{P}_{v^*}} [q_{1,v^*}(Y, X)] & \geq s\rho^2/2, \quad \text{if } s\rho^2/\sigma^2 = \Omega(\sqrt{s \log d/n}), \\ \mathbb{E}_{\mathbb{P}_{v^*}} [q_{2,v^*}(Y, X)] & \geq \sqrt{\alpha^2 s\rho^2}/2, \quad \text{if } s\rho^2/\sigma^2 = \Omega(1/\alpha^2 \cdot s \log d/n), \end{aligned}$$

827 which concludes the proof of Lemma B.5.  $\square$

*Proof.* In the following proof, we denote by  $C$  and  $C'$  absolute constants, the value of which may vary from lines to lines. We define the following unbounded query functions,

$$\begin{aligned}\tilde{q}_{1,j}(Y, X) &= \psi(Y) \cdot (X_j^2 - 1) \cdot \mathbb{1}\{|\psi(Y)| \leq (R \cdot \log n)^{1/\nu}\}, \quad j \in [d], \\ \tilde{q}_{2,j}(Y, X) &= YX_j \cdot \mathbb{1}\{|Y| \leq (R \cdot \log n)^{1/\nu}\}, \quad j \in [d].\end{aligned}\tag{C.66}$$

The proof is similar to the proof of Lemma B.5 in §C.4. Following from (C.66) and (A.11), it holds that

$$|\mathbb{E}_{\mathbb{P}_0}[\tilde{q}_{1,j}(Y, X) - q_{1,j}(Y, X)]|^2 \leq \mathbb{E}_{\mathbb{P}_0}[\psi^2(Y) \cdot (X_j^2 - 1)^2] \cdot \mathbb{P}_0(|X_j| \geq R \cdot \sqrt{\log n}), \tag{C.67}$$

where the inequality follows from the Cauchy-Schwartz inequality. Under the null hypothesis,  $Y$  is independent of  $X$ . Meanwhile, it holds that  $X \sim N(0, I_d)$ . Thus, we have  $X_j \sim N(0, 1)$ . Following from the Gaussian tail bound in (C.54), we have

$$|\mathbb{E}_{\mathbb{P}_0}[\tilde{q}_{1,j}(Y, X) - q_{1,j}(Y, X)]|^2 \leq C \cdot \exp(-R^2 \cdot \log n/2). \tag{C.68}$$

Therefore, for a sufficiently large constant  $R$ , the right-hand side of (C.68) is upper bounded by  $1/n^2$ . Under the alternative hypothesis, it follows from the Cauchy-Schwartz inequality that

$$\begin{aligned}|\mathbb{E}_{\mathbb{P}_{v^*}}[\tilde{q}_{1,j}(Y, X) - q_{1,j}(Y, X)]|^2 &\leq \mathbb{E}_{\mathbb{P}_{v^*}}[\psi^2(Y) \cdot (X_j^2 - 1)^2] \cdot \mathbb{P}_{v^*}(|X_j| \geq R \cdot \sqrt{\log n}) \\ &\leq \sqrt{\mathbb{E}_{\mathbb{P}_{v^*}}[\psi^4(Y)] \cdot \mathbb{E}_{\mathbb{P}_{v^*}}[(X_j^2 - 1)^4]} \cdot \mathbb{P}_{v^*}(|X_j| \geq R \cdot \sqrt{\log n}).\end{aligned}\tag{C.69}$$

Following from Assumption A.1, it holds that  $\mathbb{E}_{\mathbb{P}_{v^*}}[\psi^4(Y)]$  is upper bounded under the alternative hypothesis. Meanwhile, it holds that  $X_j \sim N(0, 1)$  under the alternative hypothesis. Therefore, for a sufficiently large constant  $R$ , the right-hand side of (C.69) is upper bounded by  $1/n^2$ .

For  $q_{2,j}(X, Y)$ , we follow similar arguments. By the Cauchy-Schwartz inequality, it holds under the null hypothesis that

$$|\mathbb{E}_{\mathbb{P}_0}[\tilde{q}_{2,j}(Y, X) - q_{2,j}(Y, X)]|^2 \leq \mathbb{E}_{\mathbb{P}_0}[Y^2 X_j^2] \cdot \mathbb{P}_0(|X_j| \geq R \cdot \sqrt{\log n}). \tag{C.70}$$

Note that  $Y$  is independent of  $X$  and  $X_j \sim N(0, 1)$  under the null hypothesis. Thus, following from the Gaussian tail bound, it holds for a sufficiently large constant  $R$  that

$$|\mathbb{E}_{\mathbb{P}_0}[\tilde{q}_{2,j}(Y, X) - q_{2,j}(Y, X)]|^2 \leq 1/n^2. \tag{C.71}$$

Meanwhile, it holds under the alternative hypothesis that

$$\begin{aligned}|\mathbb{E}_{\mathbb{P}_{v^*}}[\tilde{q}_{2,j}(Y, X) - q_{2,j}(Y, X)]|^2 &\leq \mathbb{E}_{\mathbb{P}_{v^*}}[Y^2 X_j^2] \cdot \mathbb{P}_{v^*}(|X_j| \geq R \cdot \sqrt{\log n}) \\ &\leq \sqrt{\mathbb{E}_{\mathbb{P}_{v^*}}[Y^4] \cdot \mathbb{E}_{\mathbb{P}_{v^*}}[X_j^4]} \cdot \mathbb{P}_{v^*}(|X_j| \geq R \cdot \sqrt{\log n}),\end{aligned}\tag{C.72}$$

where the above inequalities follow from the Cauchy-Schwartz inequality. Also, by Assumption A.1, it holds that  $\mathbb{E}_{\mathbb{P}_{v^*}}[Y^4]$  is upper bounded under the alternative hypothesis. Therefore, the right-hand side of (C.72) is upper bounded by  $1/n^2$  with a sufficiently large constant  $R$ . In conclusion, it holds for a sufficiently large constant  $R$  that

$$\begin{aligned}|\mathbb{E}_{\mathbb{P}_0}[q_{1,j}(Y, X) - \tilde{q}_{1,j}(Y, X)]| \vee |\mathbb{E}_{\mathbb{P}_v}[q_{1,j}(Y, X) - \tilde{q}_{1,j}(Y, X)]| &\leq 1/n, \\ |\mathbb{E}_{\mathbb{P}_0}[q_{2,j}(Y, X) - \tilde{q}_{2,j}(Y, X)]| \vee |\mathbb{E}_{\mathbb{P}_v}[q_{2,j}(Y, X) - \tilde{q}_{2,j}(Y, X)]| &\leq 1/n.\end{aligned}\tag{C.73}$$

It remains to characterize the expectations of  $\tilde{q}_{1,j}(Y, X)$  and  $\tilde{q}_{2,j}(Y, X)$  under the null and alternative hypotheses. Note that under the null hypothesis, it holds that  $Y$  is independent of  $X$  and  $X_j \sim N(0, 1)$ . Therefore, we have  $\mathbb{E}_{\mathbb{P}_0}[X_j^2 - 1] = 0$  and  $\mathbb{E}_{\mathbb{P}_0}[X_j] = 0$ , which imply

$$\begin{aligned}\mathbb{E}_{\mathbb{P}_0}[\tilde{q}_{1,j}(Y, X)] &= \mathbb{E}_{\mathbb{P}_0}[\psi(Y) \cdot (X_j^2 - 1) \cdot \mathbb{1}\{|\psi(Y)| \leq (R \cdot \log n)^{1/\nu}\}] = 0, \\ \mathbb{E}_{\mathbb{P}_0}[\tilde{q}_{2,j}(Y, X)] &= \mathbb{E}_{\mathbb{P}_0}[YX_j \cdot \mathbb{1}\{|Y| \leq (R \cdot \log n)^{1/\nu}\}] = 0.\end{aligned}\tag{C.74}$$

Under the alternative hypothesis, it follows from (A.3) and (A.4) that

$$\mathbb{E}_{\mathbb{P}_{v^*}}[\psi(Y) \cdot (X_j^2 - 1)] \geq \rho^2 v_j^{*2}, \quad \mathbb{E}_{\mathbb{P}_v}[YX_j] = \alpha \rho v_j^*, \tag{C.75}$$

854 where  $v_j^* \in \{-1, 0, 1\}$  is the  $j$ -th entry of  $v^* \in \bar{\mathcal{G}}(s)$ . For the query function  $q_{1,j}(Y, X)$ , it holds that

$$\begin{aligned} \rho^2 v_j^{*2} - \mathbb{E}_{\mathbb{P}_{v^*}} [\tilde{q}_{1,j}(Y, X)] &\leq \mathbb{E}_{\mathbb{P}_{v^*}} \left[ Y^2 (X_j^2 - 1) \cdot \mathbb{1}\{|Y| > (R \cdot \log n)^{1/\nu}\} \right] \\ &\leq \sqrt{\mathbb{E}_{\mathbb{P}_{v^*}} [Y^4 (X_j^2 - 1)^2]} \cdot \sqrt{\mathbb{P}_{v^*}(|Y| > (R \cdot \log n)^{1/\nu})} \\ &\leq C \cdot \exp(-R \cdot \log n), \end{aligned} \quad (\text{C.76})$$

855 where  $C$  is a positive absolute constant and the last inequality follows from Assumption A.1. We fix  
856 an index  $k$  such that  $v_k^* \neq 0$ . Therefore, if  $s\rho^2/\sigma^2 = \Omega(\sqrt{s \log d/n})$ , it holds for a sufficiently large  
857 constant  $R$  that

$$\rho^2 - \mathbb{E}_{\mathbb{P}_v} [\tilde{q}_{1,k}(Y, X)] \leq \rho^2/4. \quad (\text{C.77})$$

858 In other words, it holds that  $\sup_{j \in [d]} \mathbb{E}_{\mathbb{P}_v} [\tilde{q}_{1,j}(Y, X)] \geq 3\rho^2/4$ . Similarly, we have

$$\rho v_j^* - \mathbb{E}_{\mathbb{P}_{v^*}} [\tilde{q}_{1,j}(Y, X)] = \mathbb{E}_{\mathbb{P}_{v^*}} [Y X_j \cdot \mathbb{1}\{|Y| > (R \cdot \log n)^{1/\nu}\}]. \quad (\text{C.78})$$

859 Meanwhile, if  $s\rho^2/\sigma^2 = \Omega(1/\alpha^2 \cdot s \log d/n)$ , it holds for a sufficiently large constant  $R$  that

$$\begin{aligned} \left| \mathbb{E}_{\mathbb{P}_{v^*}} [Y X_j \cdot \mathbb{1}\{|Y| > (R \cdot \log n)^{1/\nu}\}] \right| \\ \leq \sqrt{\mathbb{E}_{\mathbb{P}_{v^*}} [Y^2 X_j^2]} \cdot \sqrt{\mathbb{P}_{v^*}(|Y| > (R \cdot \log n)^{1/\nu})} \leq \alpha\rho/4. \end{aligned} \quad (\text{C.79})$$

860 Recall that  $v_j^* \in \{-1, 0, 1\}$  is the  $j$ -th entry of  $v^* \in \bar{\mathcal{G}}(s)$ . Following from (C.78) and (C.79), we  
861 obtain that

$$\sup_{j \in [d]} \left| \mathbb{E}_{\mathbb{P}_{v^*}} [\tilde{q}_{1,j}(Y, X)] \right| \geq 3\alpha\rho/4. \quad (\text{C.80})$$

862 Combining (C.73), (C.74), (C.77), and (C.80), we conclude that for sufficiently large  $n$  and constant  
863  $R$ , it holds that

$$\sup_{j \in [d]} \mathbb{E}_{\mathbb{P}_0} [q_{1,j}(Y, X)] \leq 1/n, \quad \sup_{j \in [d]} \mathbb{E}_{\mathbb{P}_0} [q_{1,j}(Y, X)] \leq 1/n. \quad (\text{C.81})$$

864 Moreover, for sufficiently large  $n$  and constant  $R$ , it holds that

$$\begin{aligned} \sup_{j \in [d]} \mathbb{E}_{\mathbb{P}_v^*} [q_{1,j}(Y, X)] &\geq \rho^2/2 \text{ if } s\rho^2/\sigma^2 = \Omega(\sqrt{s \log d/n}), \\ \sup_{j \in [d]} \mathbb{E}_{\mathbb{P}_v^*} [q_{2,j}(Y, X)] &\geq \alpha\rho/2 \text{ if } s\rho^2/\sigma^2 = \Omega(1/\alpha^2 \cdot s \log d/n), \end{aligned} \quad (\text{C.82})$$

865 which concludes the proof of Lemma B.6.  $\square$

## 866 C.6 Proof of Lemma C.1

867 *Proof.* In what follows, we show that for  $\gamma_n = s\rho^2/\sigma^2 = o(1/\alpha^2 \cdot s \log d/n)$ , we have

$$T = \sum_{k=1}^s \binom{s}{k} \left(\frac{s}{d}\right)^k \cdot \exp\left(\frac{4nk\alpha^2\rho^2}{\sigma^2 + s\rho^2}\right) = o(1).$$

868 Note that if  $\gamma_n = s\rho^2/\sigma^2 = o(1/\alpha^2 \cdot s \log d/n)$ , it holds that  $\rho^2/(\sigma^2 + s\rho^2) = o(1/\alpha^2 \cdot \log d/n)$ ,  
869 where  $\sigma^2$  is a constant. Therefore, we have

$$\left(\frac{s}{d}\right)^k \cdot \exp\left(\frac{4nk\alpha^2\rho^2}{\sigma^2 + s\rho^2}\right) \leq \left(\frac{s}{d}\right)^k \cdot \exp(C \cdot k \log d) = (s \cdot d^{C-1})^k, \quad (\text{C.83})$$

870 which holds for an arbitrary positive absolute constant  $C$  and a sufficiently large  $n$ , respectively.

871 Meanwhile, note that  $s = o(d^{1/2-\delta})$  for an absolute constant  $\delta > 0$  and  $\binom{s}{k} \leq (es/k)^k$ . By (C.83),  
872 it holds that

$$\binom{s}{k} \left(\frac{s}{d}\right)^k \leq (s^2 e/k \cdot d^{C-1})^k \leq (e/k \cdot d^{C-2\delta})^k. \quad (\text{C.84})$$

873 Since  $C$  is arbitrary, we fix  $C \leq \delta$ . Following from (C.84), we obtain that

$$T = \sum_{k=1}^s \binom{s}{k} \left(\frac{s}{d}\right)^k \cdot \exp\left(\frac{4nk\alpha^2\rho^2}{\sigma^2 + s\rho^2}\right) \leq \sum_{k=1}^s (e/k \cdot d^{C-2\delta})^k = o(1),$$

874 which concludes the proof of Lemma C.1.  $\square$

875 **C.7 Proof of Lemma C.2**

876 *Proof.* In the following proof, we denote by  $C$ ,  $C'$ , and  $C''$  absolute constants, the value of which  
877 may vary from lines to lines. We first show that for  $\gamma_n = s\rho^2/\sigma^2 = o(\sqrt{s \log d/n})$ , it holds that

$$T_1 = \sum_{k=1}^s \mathbb{E}_U \left[ \left( \frac{2s^2 e Q}{kd} \right)^k \right] = o(1),$$

878 where  $Q = 4\rho^2 U/(\sigma^2 + s\rho^2)$ . Recall that  $U$  is the sum of  $n$  independent Rademacher random  
879 variables with Orlicz  $\psi_2$ -norm equal to one. Therefore, it holds that  $\|U\|_{\psi_2} \leq C\sqrt{n}$  for an absolute  
880 constant  $C$ . It then follows from the definition of Orlicz  $\psi_2$ -norm [51] that

$$\mathbb{E}_U [|Q|^k] \leq \left( \frac{\sqrt{k} \cdot 4\rho^2 \cdot \|U\|_{\psi_2}}{\sigma^2 + s\rho^2} \right)^k \leq \left( \frac{C\rho^2 \sqrt{nk}}{\sigma^2 + s\rho^2} \right)^k. \quad (\text{C.85})$$

881 Following from (C.85), it holds that

$$T_1 \leq \sum_{k=1}^s \mathbb{E}_U \left[ \frac{2s^2 e |Q|}{kd} \right]^k \leq \sum_{k=1}^s \left( C e \cdot \frac{s^2 \rho^2 \sqrt{n}}{\sigma^2 d \sqrt{k}} \right)^k. \quad (\text{C.86})$$

882 For  $s\rho^2/\sigma^2 = o(\sqrt{s \log d/n})$  and  $s = o(d^{1/2-\delta})$ , it holds that

$$s\sqrt{n}/d \cdot s\rho^2/\sigma^2 = o(s/d \cdot \sqrt{s \log d}) = o(1). \quad (\text{C.87})$$

883 Combining (C.86) and (C.87), we obtain that  $T_1 = o(1)$ . It remains to show that

$$T_2 = \sum_{k=1}^s \left( \frac{s^2 e}{kd} \right)^k \cdot \mathbb{E}_U [\exp(k|Q|) \cdot \mathbf{1}\{|Q| \geq 1\}] = o(1).$$

884 By integration by parts, we have

$$\mathbb{E} [\exp(k|Q|) \cdot \mathbf{1}\{|Q| \geq 1\}] = \exp(k) \cdot \mathbb{P}(|Q| \geq 1) + \int_1^\infty k \cdot \exp(tk) \cdot \bar{F}_{|Q|}(t) dt. \quad (\text{C.88})$$

885 Note that  $Q = 4\rho^2 U/(\sigma^2 + s\rho^2)$  is symmetric and sub-Gaussian with Orlicz  $\psi_2$ -norm upper bounded  
886 by  $\|Q\|_{\psi_2} \leq C\rho^2 \sqrt{n}/(\sigma^2 + s\rho^2)$  for an absolute constant  $C$ . Thus, it holds that

$$\mathbb{P}(Q \geq t) \leq C_1 \cdot \exp \left( -\frac{C_2 \cdot t^2 (\sigma^2 + s\rho^2)^2}{\rho^4 n} \right), \quad (\text{C.89})$$

887 where  $C_1$  and  $C_2$  are positive absolute constants. Then for the right-hand side of (C.88), it holds that

$$\begin{aligned} & \int_1^\infty k \cdot \exp(tk) \cdot \bar{F}_{|Q|}(t) dt \\ & \leq C_1 k \cdot \exp \left( \frac{k^2 \rho^4 n}{4C_2 (\sigma^2 + s\rho^2)^2} \right) \cdot \int_1^\infty \exp \left( -\frac{C_2 (\sigma^2 + s\rho^2)^2}{\rho^4 n} \cdot \left( t - \frac{k\rho^4 n}{2C_2 (\sigma^2 + s\rho^2)} \right)^2 \right) dt \\ & \leq C k \cdot \exp \left( \frac{k^2 \rho^4 n}{4C_2 (\sigma^2 + s\rho^2)^2} \right) \cdot \frac{\rho^2 \sqrt{n}}{\sigma^2 + s\rho^2}, \end{aligned} \quad (\text{C.90})$$

888 where  $C$  is a positive absolute constant. Meanwhile, for  $s\rho^2/\sigma^2 = o(\sqrt{s \log d/n})$ , it holds for the  
889 right-hand side of (C.90) that

$$\exp \left( \frac{k^2 \rho^4 n}{4C_2 (\sigma^2 + s\rho^2)^2} \right) \cdot \frac{\rho^2 \sqrt{n}}{\sigma^2 + s\rho^2} \leq C' \sqrt{\log d/s} \cdot \exp(C_0 k^2 \log d/s), \quad (\text{C.91})$$

890 which holds for an arbitrary positive absolute constant  $C_0$  and a sufficiently large  $n$ , respectively.

891 Here  $C'$  is a positive absolute constant. Combining (C.88), (C.90), and (C.91), we conclude that

$$\begin{aligned} T_2 &= \sum_{k=1}^s \left( \frac{s^2 e}{kd} \right)^k \cdot \mathbb{E}_U [\exp(k|Q|) \cdot \mathbf{1}\{|Q| \geq 1\}] \\ &\leq C_1 \sum_{k=1}^s \left( \frac{s^2 e^2}{kd} \right)^k + C'' \sqrt{\log d/s} \cdot \sum_{k=1}^s k \cdot \left( \frac{s^2 e^2}{kd} \cdot \exp(C_0 k \log d/s) \right)^k. \end{aligned} \quad (\text{C.92})$$

892 Note that  $s = o(d^{1/2-\delta})$  for a positive absolute constant  $\delta$ . Thus, it holds that  $s^2 e^2 / (kd) = o(1)$  for  
 893  $0 \leq k \leq s$ , which implies that

$$\sum_{k=1}^s \left( \frac{s^2 e^2}{kd} \right)^k = o(1). \quad (\text{C.93})$$

894 Meanwhile, it holds for any  $1 \leq k \leq s$  that

$$\frac{s^2 e^2}{kd} \cdot \exp(C_0 k \log d/s) \leq \frac{s^2 e^2}{kd} \cdot \exp(C_0 \log d) \leq e^2 / d^{2\delta - C_0}. \quad (\text{C.94})$$

895 Since  $C_0$  is arbitrary, we fix  $C_0 > 2\delta$ . It then holds for a positive absolute constant  $C$  that

$$\sqrt{\log d/s} \cdot \sum_{k=1}^s k \cdot \left( \frac{s^2 e^2}{kd} \cdot \exp(C_0 k \log d/s) \right)^k \leq C \cdot \sqrt{\log d/s} \cdot e^2 / d^{2\delta - C_0} = o(1). \quad (\text{C.95})$$

896 Combining (C.92), (C.93), and (C.95), we obtain that  $T_2 = o(1)$ , which concludes the proof of  
 897 Lemma C.2.  $\square$

## 898 D Upper Bounds for General Cases

899 In this section, we characterize the upper bounds for the hypothesis testing problem in (A.1) under  
 900 the general setting. In specific, we consider the hypothesis testing problem that takes the form

$$H_0: Y = \epsilon_0 \text{ versus } H_1: Y = \begin{cases} f_1(X^\top \beta^*) + \epsilon, & \text{with probability } \alpha, \\ f_2(X^\top \beta^*) + \epsilon, & \text{with probability } 1 - \alpha. \end{cases} \quad (\text{D.1})$$

901 Here  $\epsilon$  is a Gaussian noise with variance  $\sigma^2$ ,  $\epsilon_0$  is a noise such that the variances of  $Y$  under the  
 902 null and alternative hypotheses are the same. Besides,  $f_1 \in \mathcal{C}_1 \cap \mathcal{C}(\psi)$  and  $f_2 \in \mathcal{C}_2 \cap \mathcal{C}(\psi)$  are two  
 903 unknown link functions, where  $\mathcal{C}_1(\psi)$ ,  $\mathcal{C}_2(\psi)$ , and  $\mathcal{C}(\psi)$  are defined in (2.4) and (2.5). Meanwhile,  
 904 we set  $X \sim N(0, I_d)$  and

$$(\beta^*, \sigma) \in \mathcal{G}_1(s, \gamma_n) = \{(\beta^*, \sigma) \in \mathbb{R}^{d+1}: \|\beta^*\|_0 = s, \kappa(\beta^*, \sigma) \geq \gamma_n\} \quad (\text{D.2})$$

905 under the alternative hypothesis, where  $\kappa(\beta^*, \sigma) = \|\beta^*\|_2^2 / \sigma^2$  is the SNR. We further denote by

$$\mathcal{H}(s, \gamma_n) = \{\beta^* \in \mathbb{R}^d: \|\beta^*\|_2^2 / \sigma^2 = s \rho^2 / \sigma^2 \geq \gamma_n, \|\beta^*\|_0 = s\}. \quad (\text{D.3})$$

906 We denote by  $Z = (Y, X)$  and  $\mathbb{P}_0, \mathbb{P}_{\beta^*}$  be the distributions of  $Z$  under the null and alternative  
 907 hypotheses, respectively. We assume that the Assumption A.1 holds. We denote by

$$\mathcal{V}(s) = \{\mathcal{S} \in [d]: |\mathcal{S}| = s\}$$

908 the class of index sets. For each index set  $\mathcal{S} \in \mathcal{V}(s)$ , we denote by  $\mathcal{B}(\mathcal{S})$  the  $s$ -sparse unit sphere that  
 909 is supported on the index set  $\mathcal{S}$ . We further denote by  $\mathcal{N}(\epsilon, \mathcal{S}) \subseteq \mathcal{B}(\mathcal{S})$  the minimum  $\epsilon$ -covering of  
 910 the  $s$ -sparse unit sphere  $\mathcal{B}(\mathcal{S})$ . In other words, it holds for any  $u \in \mathcal{B}(\mathcal{S})$  that  $\|u - v\|_2 \leq \epsilon$  for some  
 911  $v \in \mathcal{N}(\epsilon, \mathcal{S})$ . Meanwhile,  $\mathcal{N}(\epsilon, \mathcal{S})$  attains the smallest cardinality among the sets that have such a  
 912 property. It then holds that

$$|\mathcal{N}(\epsilon, \mathcal{S})| \leq C_0 \cdot (1 + 2/\epsilon)^s, \quad (\text{D.4})$$

913 where  $C_0$  is a positive absolute constant. We define

$$\mathcal{N}(\epsilon) = \bigcup_{\mathcal{S} \in \mathcal{V}(s)} \mathcal{N}(\epsilon, \mathcal{S}). \quad (\text{D.5})$$

914 Therefore, it holds that

$$|\mathcal{N}(\epsilon)| \leq C_0 \cdot (1 + 2/\epsilon)^s \cdot \binom{d}{s}. \quad (\text{D.6})$$

915 In what follows, we construct test functions based on  $v \in \mathcal{N}(1/2)$ . We introduce the following query  
 916 functions for  $v \in \mathcal{N}(1/2)$ ,

$$\begin{aligned} q_{1,v}(Y, X) &= \psi(Y) \cdot [(v^\top X)^2 - 1] \cdot \mathbb{1}\{|\psi(Y)| \leq (R \log n)^{1/\nu}\} \cdot \mathbb{1}\{|v^\top X| \leq R \cdot \sqrt{\log n}\}, \\ q_{2,v}(Y, X) &= Y \cdot (v^\top X) \cdot \mathbb{1}\{|Y| \leq (R \log n)^{1/\nu}\} \cdot \mathbb{1}\{|v^\top X| \leq R \cdot \sqrt{\log n}\}. \end{aligned} \quad (\text{D.7})$$

917 We denote by  $\bar{Z}_{1,v}$  and  $\bar{Z}_{2,v}$  the responses of the statistical oracle to query functions  $q_{1,v}$  and  $q_{2,v}$ , as  
 918 defined in Definition 2.3. We define the test functions  $\phi_1$  and  $\phi_2$  as

$$\phi_1 = \mathbb{1}\left\{ \sup_{v \in \bar{\mathcal{G}}(s)} \bar{Z}_{1,v} \geq \tau_1 \right\}, \quad \phi_2 = \mathbb{1}\left\{ \sup_{v \in \bar{\mathcal{G}}(s)} \bar{Z}_{2,v} \geq \tau_2 \right\}, \quad (\text{D.8})$$



919 where we set the thresholds  $\tau_1$  and  $\tau_2$  to be

$$\tau_1 = CR^{2+1/\nu} \cdot (\log n)^{1+1/\nu} \cdot \sqrt{\frac{s \log d}{n}}, \quad \tau_2 = C'R^{1+1/\nu} \cdot (\log n)^{1/2+1/\nu} \cdot \sqrt{\frac{s \log d}{n}}, \quad (\text{D.9})$$

920 where  $C$  and  $C'$  are positive absolute constants that will be specified in §D.1. We define the test  
921 function as  $\phi = \phi_1 \vee \phi_2$ . Following from (D.6), the capacity of  $\mathcal{Q}_\phi$  is upper bounded as follows,

$$|\mathcal{Q}_\phi| \leq 2C_0 \cdot 5^s \cdot \binom{d}{s}. \quad (\text{D.10})$$

922 The following theorem characterizes an upper bound for the minimax separation rate by quantifying  
923 the SNR for  $\phi$  to be asymptotically powerful.

924 **Theorem D.1.** We consider the hypothesis testing problem in (D.1) under Assumption A.1. For

$$\gamma_n = \Omega\left((\log n)^{1+1/\nu} \cdot \sqrt{\frac{s \log d}{n}} \bigwedge \frac{(\log n)^{1+2/\nu}}{\alpha^2} \cdot \frac{s \log d}{n}\right), \quad (\text{D.11})$$

925 it holds that  $R_n(\phi; \mathcal{G}_0, \mathcal{G}_1) = O(1/d)$ . In other words,  $\phi$  is asymptotically powerful.

926 *Proof.* See §D.1 for a detailed proof. □

927 To construct a computationally tractable test, we define query functions as follows,

$$\begin{aligned} q_{1,j}(Y, X) &= \psi(Y) \cdot (X_j^2 - 1) \cdot \mathbb{1}\{|\psi(Y)| \leq (R \log n)^{1/\nu}\} \cdot \mathbb{1}\{|X_j| \leq R\sqrt{\log n}\}, \quad j \in [d] \\ q_{2,j}(Y, X) &= Y \cdot X_j \cdot \mathbb{1}\{|Y| \leq (R \log n)^{1/\nu}\} \cdot \mathbb{1}\{|X_j| \leq R\sqrt{\log n}\}, \quad j \in [d]. \end{aligned} \quad (\text{D.12})$$

928 We denote by  $\bar{Z}_{1,j}$  and  $\bar{Z}_{2,j}$  the responses of the statistical oracle to the query functions  $q_{1,j}$  and  $q_{2,j}$ ,  
929 as defined in Definition 2.3. We define the test functions  $\tilde{\phi}_1$  and  $\tilde{\phi}_2$  as

$$\tilde{\phi}_1 = \mathbb{1}\left\{\sup_{j \in [d]} \bar{Z}_{1,j} \geq \tilde{\tau}_1\right\}, \quad \tilde{\phi}_2 = \mathbb{1}\left\{\sup_{j \in [d]} \bar{Z}_{2,j} \geq \tilde{\tau}_2\right\} \bigvee \mathbb{1}\left\{\inf_{j \in [d]} \bar{Z}_{2,j} \leq -\tilde{\tau}_2\right\}, \quad (\text{D.13})$$

930 where we set the thresholds  $\tilde{\tau}_1$  and  $\tilde{\tau}_2$  to be

$$\tilde{\tau}_1 = CR^{2+1/\nu}(\log n)^{1+1/\nu} \cdot \sqrt{\frac{\log d}{n}}, \quad \tilde{\tau}_2 = C'R^{1+1/\nu}(\log n)^{1/2+1/\nu} \cdot \sqrt{\frac{\log d}{n}}. \quad (\text{D.14})$$

931 We define the test function  $\tilde{\phi} = \tilde{\phi}_1 \vee \tilde{\phi}_2$ . Therefore, the test function  $\tilde{\phi}$  is with capacity of query  
932 functions  $|\mathcal{Q}_{\tilde{\phi}}| = 2d$ . The following theorem holds, which characterizes the minimum SNR required  
933 for the test function  $\tilde{\phi}$  to be asymptotically powerful.

934 **Theorem D.2.** We consider the hypothesis testing problem in (D.1) under Assumption A.1. For

$$\gamma_n = \Omega\left((\log n)^{1+1/\nu} \cdot \sqrt{\frac{s^2 \log d}{n}} \bigwedge \frac{(\log n)^{1+2/\nu}}{\alpha^2} \cdot \frac{s \log d}{n}\right), \quad (\text{D.15})$$

935 it holds that  $\bar{R}_n(\tilde{\phi}; \mathcal{G}_0, \mathcal{G}_1) = O(1/d)$ . In other words,  $\tilde{\phi}$  is asymptotically powerful.

936 *Proof.* See §D.2 for a detailed proof. □

## 937 D.1 Proof of Theorem D.1

938 *Proof.* The proof is similar to that of Theorem A.2 in §B.3. Recall that we denote by  $\mathbb{P}_0$  and  $\mathbb{P}_{\beta^*}$  the  
939 distributions of  $Z = (Y, X)$  under the null and alternative hypotheses, respectively. The following  
940 lemma holds, which characterizes the expectation of  $q_{1,v}$  and  $q_{2,v}$  under the null and alternative  
941 hypotheses, respectively.

942 **Lemma D.3.** For any  $v \in \mathcal{N}(1/2)$ ,  $\beta^* \in \mathcal{H}(s, \gamma_n)$ , and

$$\gamma_n = \Omega\left((\log n)^{1+1/\nu} \cdot \sqrt{\frac{s \log d}{n}} \bigwedge \frac{(\log n)^{1+2/\nu}}{\alpha^2} \cdot \frac{s \log d}{n}\right),$$

943 it holds that

$$\mathbb{E}_{\mathbb{P}_0}[q_{1,v}(Y, X)] \leq 1/n, \quad \mathbb{E}_{\mathbb{P}_0}[q_{2,v}(Y, X)] \leq 1/n. \quad (\text{D.16})$$

944 In addition, it holds that

$$\begin{aligned} \sup_{v \in \mathcal{N}(1/2)} \mathbb{E}_{\mathbb{P}_{\beta^*}} [q_{1,v}(Y, X)] &\geq s\rho^2/2 \text{ if } \gamma_n = \Omega\left((\log n)^{1+1/\nu} \cdot \sqrt{\frac{s \log d}{n}}\right), \\ \sup_{v \in \mathcal{N}(1/2)} \mathbb{E}_{\mathbb{P}_{\beta^*}} [q_{2,v}(Y, X)] &\geq \sqrt{\alpha^2 s \rho^2}/2 \text{ if } \gamma_n = \Omega\left(\frac{(\log n)^{1+2/\nu}}{\alpha^2} \cdot \frac{s \log d}{n}\right). \end{aligned} \quad (\text{D.17})$$

945 *Proof.* See §D.3 for a detailed proof.  $\square$

946 It now suffices to upper bound the risk of  $\phi = \phi_1 \vee \phi_2$ , where  $\phi_1$  and  $\phi_2$  are defined in (D.8). Recall  
947 that we define the threshold  $\tau_1$  and  $\tau_2$  as

$$\tau_1 = CR^{2+1/\nu} \cdot (\log n)^{1+1/\nu} \cdot \sqrt{\frac{s \log d}{n}}, \quad \tau_2 = C'R^{1+1/\nu} \cdot (\log n)^{1/2+1/\nu} \cdot \sqrt{\frac{s \log d}{n}}, \quad (\text{D.18})$$

948 where  $C$  and  $C'$  are positive absolute constants. Note that for the test function  $\phi$ , the capacity of  
949 query functions is upper bounded in (D.10). Therefore, following from (2.12) with  $\xi = 1/d$ , it holds  
950 for a sufficiently large  $n$  that

$$\begin{aligned} \tau_{q_{1,v}} &\leq C_1 R^{2+1/\nu} (\log n)^{1/2+1/\nu} \cdot \sqrt{\frac{s \log d}{n}}, \\ \tau_{q_{2,v}} &\leq C_2 R^{1+1/\nu} (\log n)^{1/2+1/\nu} \cdot \sqrt{\frac{s \log d}{n}}, \end{aligned} \quad (\text{D.19})$$

951 where  $\tau_{q_{1,v}}$  and  $\tau_{q_{2,v}}$  are the tolerance parameters of  $q_{1,v}$  and  $q_{2,v}$  defined in Definition 2.3, and  
952  $C_1, C_2$  are positive absolute constants. We fix  $C$  and  $C'$  in (D.18) such that  $\tau_1 \geq \tau_{q_{1,v}} + 1/n$  and  
953  $\tau_2 \geq \tau_{q_{2,v}} + 1/n$ . The rest of the proof then follows a similar argument in §B.3. Recall that we  
954 denote by  $\bar{Z}_{1,v}$  and  $\bar{Z}_{2,v}$  the responses of the statistical oracle to the query functions  $q_{1,v}$  and  $q_{2,v}$ .  
955 We denote by  $\bar{\mathbb{P}}_0$  and  $\bar{\mathbb{P}}_{\beta^*}$  the distributions of response of the statistical oracle to the query functions  
956 when the true distribution of the data is  $\mathbb{P}_0$  and  $\mathbb{P}_{\beta^*}$ . Following from Lemma D.3, it holds for any  
957  $v \in \mathcal{N}(1/2)$  that

$$\bar{\mathbb{P}}_0(\bar{Z}_{i,v} \geq \tau_i) \leq \bar{\mathbb{P}}_0(|\bar{Z}_{i,v} - \mathbb{E}_{\mathbb{P}_0}[q_{i,v}(Y, X)]| \geq \tau_{q_{i,v}}), \quad i \in \{1, 2\}.$$

958 Therefore, following from (2.11) with  $\xi = 1/d$ , we obtain

$$\begin{aligned} \bar{\mathbb{P}}_0(\phi_i = 1) &= \bar{\mathbb{P}}_0\left(\sup_{v \in \mathcal{N}(1/2)} \bar{Z}_{i,v} > \tau_i\right) \\ &\leq \bar{\mathbb{P}}_0\left(\bigcup_{v \in \mathcal{N}(1/2)} \left\{|\bar{Z}_{i,v} - \mathbb{E}_{\mathbb{P}_0}[q_{i,v}(Y, X)]| > \tau_{q_{i,v}}\right\}\right) \leq 2/d. \end{aligned} \quad (\text{D.20})$$

959 Recall that we define  $\phi = \phi_1 \vee \phi_2$ . Then it holds that

$$\bar{\mathbb{P}}_0(\phi = 1) \leq \bar{\mathbb{P}}_0(\phi_1 = 1) + \bar{\mathbb{P}}_0(\phi_2 = 1) = 4/d, \quad (\text{D.21})$$

960 which is an upper bound of the type-I error of  $\phi$ . It now suffices to upper bound the type-II error of  $\phi$ .  
961 If (D.11) holds, we obtain that either  $s\rho^2/4 \geq \tau_1$  or  $\sqrt{\alpha^2 s \rho^2}/4 \geq \tau_2$  for a sufficiently large  $n$ . We  
962 denote by

$$v^* \in \operatorname{argmax}_{v \in \mathcal{N}(1/2)} \mathbb{E}_{\mathbb{P}_{\beta^*}} [q_{1,v}(Y, X)], \quad u^* \in \operatorname{argmax}_{v \in \mathcal{N}(1/2)} \mathbb{E}_{\mathbb{P}_{\beta^*}} [q_{2,v}(Y, X)].$$

963 If it holds that  $s\rho^2/4 \geq \tau_1$ , then following from Lemma D.3, we obtain that

$$\begin{aligned} \bar{\mathbb{P}}_{\beta^*}(\phi_1 = 0) &= \bar{\mathbb{P}}_{\beta^*}\left(\sup_{v \in \mathcal{N}(1/2)} \bar{Z}_{1,v} < \tau_1\right) \leq \bar{\mathbb{P}}_{\beta^*}(\bar{Z}_{1,v^*} < \tau_1) \\ &\leq \bar{\mathbb{P}}_{\beta^*}\left(\bar{Z}_{1,v^*} < \mathbb{E}_{\mathbb{P}_{\beta^*}} [q_{1,v^*}(Y, X)] - \tau_1\right) \end{aligned} \quad (\text{D.22})$$

$$\leq \bar{\mathbb{P}}_{\beta^*}\left(|\bar{Z}_{1,v^*} - \mathbb{E}_{\mathbb{P}_{\beta^*}} [q_{1,v^*}(Y, X)]| > \tau_{q_{1,v^*}}\right), \quad (\text{D.23})$$

964 where the last inequality follows from the fact that  $\tau_1 > \tau_{q_{1,v^*}}$ . Therefore, following from (2.11)  
965 with  $\xi = 1/d$ , we obtain that the right-hand side of (D.22) is upper bounded by  $2/d$ . Similarly, if it

holds that  $\sqrt{\alpha^2 s \rho^2}/4 \geq \tau_2$ , we obtain

$$\begin{aligned}\bar{\mathbb{P}}_{\beta^*}(\phi_2 = 0) &= \bar{\mathbb{P}}_{\beta^*}\left(\sup_{v \in \mathcal{N}(1/2)} \bar{Z}_{1,v} < \tau_1\right) \leq \bar{\mathbb{P}}_{\beta^*}(\bar{Z}_{2,u^*} < \tau_2) \\ &\leq \bar{\mathbb{P}}_{\beta^*}\left(|\bar{Z}_{2,u^*} - \mathbb{E}_{\mathbb{P}_{\beta^*}}[q_{2,u^*}(Y, X)]| > \tau_{q_{2,u^*}}\right),\end{aligned}\quad (\text{D.24})$$

where the last inequality follows from the fact that  $\tau_1 > \tau_{q_{1,u^*}}$ . Therefore, following from (2.11) with  $\xi = 1/d$ , we obtain that the right-hand side of (D.24) is upper bounded by  $2/d$ . Note that (D.22) and (D.24) holds for all  $(\beta^*, \sigma) \in \mathcal{G}_1(s, \gamma_n)$  if (D.11) holds. Therefore, we conclude that

$$\sup_{(\beta^*, \sigma) \in \mathcal{G}_1} \bar{\mathbb{P}}_{\beta^*}(\phi = 0) \leq \sup_{(\beta^*, \sigma) \in \mathcal{G}_1} \{\bar{\mathbb{P}}_{\beta^*}(\phi_1 = 0) \wedge \bar{\mathbb{P}}_{\beta^*}(\phi_2 = 0)\} \leq 2/d. \quad (\text{D.25})$$

Combining (D.21) and (D.25), we obtain that if (D.11) holds, the risk of  $\phi$  is  $O(1/d)$ , which concludes the proof.  $\square$

## D.2 Proof of Theorem D.2

*Proof.* The proof is similar to that of Theorem A.3 in §B.4. Recall that we denote by  $\mathbb{P}_0$  and  $\mathbb{P}_{\beta^*}$  the distributions of  $Z = (Y, X)$  under the null and alternative hypotheses, respectively. The following lemma holds, which characterizes the expectation of  $q_{1,j}(Y, X)$  and  $q_{2,j}(Y, X)$  under the null and alternative hypotheses, respectively.

**Lemma D.4.** For any  $\beta^* \in \mathcal{H}(s, \gamma_n)$  and

$$\gamma_n = \Omega\left((\log n)^{1+1/\nu} \cdot \sqrt{\frac{s^2 \log d}{n}} \wedge \frac{(\log n)^{1+2/\nu}}{\alpha^2} \cdot \frac{s \log d}{n}\right),$$

it holds that

$$\sup_{j \in [d]} \mathbb{E}_{\mathbb{P}_0}[q_{1,j}(Y, X)] \leq 1/n, \quad \sup_{j \in [d]} \mathbb{E}_{\mathbb{P}_0}[q_{2,j}(Y, X)] \leq 1/n. \quad (\text{D.26})$$

In addition, it holds that

$$\begin{aligned}\sup_{j \in [d]} \mathbb{E}_{\mathbb{P}_{\beta^*}}[q_{1,j}(Y, X)] &\geq \rho^2/2 \text{ if } \gamma_n = \Omega\left((\log n)^{1+1/\nu} \cdot \sqrt{\frac{s^2 \log d}{n}}\right), \\ \sup_{j \in [d]} |\mathbb{E}_{\mathbb{P}_{\beta^*}}[q_{2,j}(Y, X)]| &\geq \alpha \rho/2 \text{ if } \gamma_n = \Omega\left(\frac{(\log n)^{1+2/\nu}}{\alpha^2} \cdot \frac{s \log d}{n}\right).\end{aligned}\quad (\text{D.27})$$

*Proof.* See §D.4 for a detailed proof.  $\square$

In what follows, we upper bound the risk of  $\tilde{\phi} = \tilde{\phi}_1 \vee \tilde{\phi}_2$  where  $\tilde{\phi}_1$  and  $\tilde{\phi}_2$  are defined in (D.13). Recall that we define the threshold  $\tilde{\tau}_1$  and  $\tilde{\tau}_2$  as

$$\tilde{\tau}_1 = CR^{2+1/\nu}(\log n)^{1+1/\nu} \cdot \sqrt{\frac{\log d}{n}}, \quad \tilde{\tau}_2 = C'R^{1+1/\nu}(\log n)^{1/2+1/\nu} \cdot \sqrt{\frac{\log d}{n}}, \quad (\text{D.28})$$

where  $C$  and  $C'$  are absolute constants. Note that for  $\tilde{\phi}$ , the capacity of query functions is  $2d$ . Therefore, following from (2.12) with  $\xi = 1/d$ , it holds for a sufficiently large  $n$  that

$$\tau_{q_{1,j}} \leq C_1 R^{2+1/\nu}(\log n)^{1/2+1/\nu} \cdot \sqrt{\frac{\log d}{n}}, \quad \tau_{q_{2,j}} \leq C_2 R^{1+1/\nu}(\log n)^{1/2+1/\nu} \cdot \sqrt{\frac{\log d}{n}}, \quad (\text{D.29})$$

where  $C_1$  and  $C_2$  are positive absolute constants. We fix  $C$  and  $C'$  in (D.28) such that  $\tilde{\tau}_1 > \tau_{q_{1,j}} + 1/n$  and  $\tau_2 > \tau_{12,j} + 1/n$  for a sufficiently large  $n$ . Recall that we denote by  $\bar{Z}_{1,j}$  and  $\bar{Z}_{2,j}$  the responses of the statistical oracle to the query functions  $q_{1,j}$  and  $q_{2,j}$ . We denote by  $\mathbb{P}_0$  and  $\mathbb{P}_{\beta^*}$  the distributions of response of the statistical oracle to the query functions when the true distribution of the data is  $\mathbb{P}_0$  and  $\mathbb{P}_{\beta^*}$ . Following from Lemma D.3, it holds for  $j \in [d]$  and  $i \in \{1, 2\}$  that

$$\bar{\mathbb{P}}_0(\bar{Z}_{i,j} \geq \tilde{\tau}_1) \leq \bar{\mathbb{P}}_0\left(|\bar{Z}_{i,j} - \mathbb{E}_{\mathbb{P}_0}[q_{i,j}(Y, X)]| \geq \tau_{q_{i,j}}\right). \quad (\text{D.30})$$

Therefore, following from (2.11) with  $\xi = 1/d$ , it holds for  $i \in \{1, 2\}$  that

$$\begin{aligned}\bar{\mathbb{P}}_0(\tilde{\phi}_i = 1) &= \bar{\mathbb{P}}_0\left(\sup_{j \in [d]} \bar{Z}_{i,j} > \tilde{\tau}_i\right) \\ &\leq \bar{\mathbb{P}}_0\left(\bigcup_{j \in [d]} \left\{|\bar{Z}_{i,j} - \mathbb{E}_{\mathbb{P}_0}[q_{i,j}(Y, X)]| > \tau_{q_{i,j}}\right\}\right) \leq 2/d,\end{aligned}\quad (\text{D.31})$$

which further shows that

$$\bar{\mathbb{P}}_0(\tilde{\phi} = 1) \leq \bar{\mathbb{P}}_0(\tilde{\phi}_1 = 1) + \bar{\mathbb{P}}_0(\tilde{\phi}_2 = 1) \leq 4/d. \quad (\text{D.32})$$

In other words, it holds that the type-I error of  $\tilde{\phi}$  is asymptotically upper bounded by  $4/d$ . It remains to upper bound the type-II error of  $\tilde{\phi}$ . Note that if (D.15) holds, it holds that either  $\rho^2/4 \geq \tilde{\tau}_1$  or  $\alpha\rho/4 \geq \tilde{\tau}_2$  for a sufficiently large  $n$ . We denote by

$$j^* \in \operatorname{argmax}_{j \in [d]} \mathbb{E}_{\mathbb{P}_{\beta^*}}[q_{1,j}(Y, X)], \quad k^* \in \operatorname{argmax}_{j \in [d]} |\mathbb{E}_{\mathbb{P}_{\beta^*}}[q_{2,j}(Y, X)]|.$$

If it holds that  $\rho^2/4 \geq \tilde{\tau}_1$ , following from Lemma D.4, we obtain that

$$\begin{aligned}\bar{\mathbb{P}}_{\beta^*}(\tilde{\phi}_1 = 0) &\leq \bar{\mathbb{P}}_{\beta^*}\left(\sup_{j \in [d]} \bar{Z}_{1,j} < \tilde{\tau}_2\right) \leq \bar{\mathbb{P}}_{\beta^*}(\bar{Z}_{1,j^*} < \tilde{\tau}_1) \\ &\leq \bar{\mathbb{P}}_{\beta^*}\left(\bar{Z}_{1,j^*} < \mathbb{E}_{\mathbb{P}_{\beta^*}}[q_{1,j^*}(Y, X)] - \tilde{\tau}_1\right) \\ &\leq \bar{\mathbb{P}}_{\beta^*}\left(|\bar{Z}_{2,j^*} - \mathbb{E}_{\mathbb{P}_v}[q_{2,j^*}(Y, X)]| > \tau_{q_{2,j^*}}\right) \leq 2/d,\end{aligned}\quad (\text{D.33})$$

where the fourth inequality follows from the fact that  $\tilde{\tau}_1 > \tau_{q_{1,j^*}}$ , and the last inequality following from (2.11) with  $\xi = 1/d$ . If it holds that  $\alpha\rho/4 \geq \tilde{\tau}_2$ , following from Lemma D.4, we obtain that either  $\mathbb{E}_{\mathbb{P}_{\beta^*}}[q_{2,k^*}(Y, X)] \geq \alpha\rho/2$  or  $\mathbb{E}_{\mathbb{P}_{\beta^*}}[q_{2,k^*}(Y, X)] \leq -\alpha\rho/2$ . If  $\mathbb{E}_{\mathbb{P}_{\beta^*}}[q_{2,k^*}(Y, X)] \geq \alpha\rho/2$ , we obtain that

$$\begin{aligned}\bar{\mathbb{P}}_{\beta^*}(\tilde{\phi}_2 = 0) &\leq \bar{\mathbb{P}}_{\beta^*}\left(\sup_{j \in [d]} \bar{Z}_{2,j} < \tilde{\tau}_2\right) \leq \bar{\mathbb{P}}_{\beta^*}(\bar{Z}_{2,k^*} < \tilde{\tau}_2) \\ &\leq \bar{\mathbb{P}}_{\beta^*}\left(\bar{Z}_{2,k^*} < \mathbb{E}_{\mathbb{P}_{\beta^*}}[q_{2,k^*}(Y, X)] - \tilde{\tau}_2\right) \\ &\leq \bar{\mathbb{P}}_{\beta^*}\left(|\bar{Z}_{2,k^*} - \mathbb{E}_{\mathbb{P}_v}[q_{2,k^*}(Y, X)]| > \tau_{q_{2,k^*}}\right) \leq 2/d,\end{aligned}\quad (\text{D.34})$$

where the fourth inequality follows from the fact that  $\tilde{\tau}_2 > \tau_{q_{2,k^*}}$ , and the last inequality follows from (2.11) with  $\xi = 1/d$ . If it holds that  $\mathbb{E}_{\mathbb{P}_{\beta^*}}[q_{2,k^*}(Y, X)] \leq -\alpha\rho/2$ , we obtain that

$$\begin{aligned}\bar{\mathbb{P}}_{\beta^*}(\tilde{\phi}_2 = 0) &\leq \bar{\mathbb{P}}_{\beta^*}\left(\inf_{j \in [d]} \bar{Z}_{2,j} > -\tilde{\tau}_2\right) \leq \bar{\mathbb{P}}_{\beta^*}(\bar{Z}_{2,k^*} > -\tilde{\tau}_2) \\ &\leq \bar{\mathbb{P}}_{\beta^*}\left(\bar{Z}_{2,k^*} > \mathbb{E}_{\mathbb{P}_{\beta^*}}[q_{2,k^*}(Y, X)] + \tilde{\tau}_2\right) \\ &\leq \bar{\mathbb{P}}_{\beta^*}\left(|\bar{Z}_{2,k^*} - \mathbb{E}_{\mathbb{P}_v}[q_{2,k^*}(Y, X)]| > \tau_{q_{2,k^*}}\right) \leq 2/d,\end{aligned}\quad (\text{D.35})$$

where the fourth inequality follows from the fact that  $\tilde{\tau}_2 > \tau_{q_{2,k^*}}$ , and the last inequality follows from (2.11) with  $\xi = 1/d$ . Note that (D.33), (D.34), and (D.35) holds for all  $(\beta^*, \sigma) \in \mathcal{G}_1(s, \gamma_n)$  if (D.15) holds. Therefore, we obtain that

$$\sup_{(\beta^*, \sigma) \in \mathcal{G}_1} \bar{\mathbb{P}}_{\beta^*}(\tilde{\phi} = 0) \leq \sup_{(\beta^*, \sigma) \in \mathcal{G}_1} \left\{ \bar{\mathbb{P}}_{\beta^*}(\tilde{\phi}_1 = 0) \wedge \bar{\mathbb{P}}_{\beta^*}(\tilde{\phi}_2 = 0) \right\} \leq 2/d. \quad (\text{D.36})$$

Combining (D.32) and (D.36), we obtain that if (D.15) holds, the risk of  $\tilde{\phi}$  is  $O(1/d)$ , which concludes the proof of Theorem D.2.  $\square$

### D.3 Proof of Lemma D.3

*Proof.* In the following proof, we denote by  $C$  and  $C'$  absolute constants, the value of which may vary from lines to lines. We define the following query functions,

$$\begin{aligned}\tilde{q}_{1,v}(Y, X) &= \psi(Y) \cdot [(v^\top X)^2 - 1] \cdot \mathbb{1}\{|\psi(Y)| \leq (R \cdot \log n)^{1/\nu}\}, \quad v \in \bar{\mathcal{G}}(s), \\ \tilde{q}_{2,v}(Y, X) &= Y \cdot (v^\top X) \cdot \mathbb{1}\{|Y| \leq (R \cdot \log n)^{1/\nu}\}, \quad v \in \bar{\mathcal{G}}(s).\end{aligned}\quad (\text{D.37})$$

1010 Following from (D.7) and (D.37), we conclude that

$$\begin{aligned}\tilde{q}_{1,v} - q_{1,v} &= \psi(Y) \cdot [(v^\top X)^2 - 1] \cdot \mathbb{1}\{|\psi(Y)| \leq (R \cdot \log n)^{1/\nu}\} \cdot \mathbb{1}\{|v^\top X| > R \cdot \sqrt{\log n}\}, \\ \tilde{q}_{2,v} - q_{2,v} &= Y \cdot (v^\top X) \cdot \mathbb{1}\{|Y| \leq (R \cdot \log n)^{1/\nu}\} \cdot \mathbb{1}\{|v^\top X| > R \cdot \sqrt{\log n}\}.\end{aligned}\quad (\text{D.38})$$

1011 Therefore, following from the Cauchy-Schwartz inequality, we obtain from (D.38) that

$$\begin{aligned}|\mathbb{E}_{\mathbb{P}_0}[\tilde{q}_{1,v}(Y, X) - q_{1,v}(Y, X)]|^2 \\ \leq \mathbb{E}_{\mathbb{P}_0}[\psi^2(Y) \cdot [(v^\top X)^2 - 1]^2] \cdot \mathbb{P}_0(|v^\top X| \geq R \cdot \sqrt{\log n}).\end{aligned}\quad (\text{D.39})$$

1012 Further note that under the null hypothesis,  $Y$  is independent of  $X$  and  $X \sim N(0, I_d)$ . Therefore,  
1013 for  $v \in \mathcal{N}(1/2)$ , it holds that  $v^\top X \sim N(0, 1)$ . Meanwhile, following from Assumption A.1,  $Y$  has  
1014 bounded fourth moment. Therefore, we obtain from (D.39) and the tail bound of standard Gaussian  
1015 distribution in (C.54) that

$$|\mathbb{E}_{\mathbb{P}_0}[\tilde{q}_{1,v}(Y, X) - q_{1,v}(Y, X)]|^2 \leq C \cdot \exp(-R^2 \log n), \quad (\text{D.40})$$

1016 where  $C$  is a positive absolute constant. Similarly, it holds under the alternative hypothesis that

$$\begin{aligned}|\mathbb{E}_{\mathbb{P}_\beta^*}[\tilde{q}_{1,v}(Y, X) - q_{1,v}(Y, X)]|^2 \\ \leq \mathbb{E}_{\mathbb{P}_\beta^*}[\psi^2(Y) \cdot [(v^\top X)^2 - 1]^2] \cdot \mathbb{P}_0(|v^\top X| \geq R \cdot \sqrt{\log n}) \\ \leq \left( \mathbb{E}_{\mathbb{P}_\beta^*}[\psi^4(Y)] \cdot \mathbb{E}_{\mathbb{P}_\beta^*}[(v^\top X)^2 - 1]^4 \right)^{1/2} \cdot \mathbb{P}_0(|v^\top X| \geq R \cdot \sqrt{\log n}),\end{aligned}\quad (\text{D.41})$$

1017 where the above inequalities follow from the Cauchy-Schwartz inequality. Then following from  
1018 Assumption A.1 and the fact that  $X \sim N(0, I_d)$  under the alternative hypothesis, we conclude that

$$\begin{aligned}|\mathbb{E}_{\mathbb{P}_\beta^*}[\tilde{q}_{1,v}(Y, X) - q_{1,v}(Y, X)]|^2 \leq C' \cdot \mathbb{P}_{\beta^*}(|v^\top X| \geq R \cdot \sqrt{\log n}) \\ \leq C' \cdot \exp(-R^2 \log n),\end{aligned}\quad (\text{D.42})$$

1019 where  $C'$  is a positive absolute constant, and the last inequality follows from the tail bound of standard  
1020 Gaussian distribution in (C.54). Similar argument holds for the query functions  $q_{2,v}(Y, X)$  and  
1021  $\tilde{q}_{2,v}(Y, X)$ . We conclude from (D.40), (D.42) and a similar argument on  $q_{2,v}(Y, X)$  and  $\tilde{q}_{2,v}(Y, X)$   
1022 that

$$\begin{aligned}|\mathbb{E}_{\mathbb{P}_{\beta^*}}[q_{1,v}(Y, X) - \tilde{q}_{1,v}(Y, X)]| \vee |\mathbb{E}_{\mathbb{P}_0}[q_{1,v}(Y, X) - \tilde{q}_{1,v}(Y, X)]| \leq 1/n, \\ |\mathbb{E}_{\mathbb{P}_{\beta^*}}[q_{2,v}(Y, X) - \tilde{q}_{2,v}(Y, X)]| \vee |\mathbb{E}_{\mathbb{P}_0}[q_{2,v}(Y, X) - \tilde{q}_{2,v}(Y, X)]| \leq 1/n,\end{aligned}\quad (\text{D.43})$$

1023 which holds for  $v \in \mathcal{N}(1/2)$ ,  $\beta^* \in \mathcal{H}(s, \gamma_n)$ , and sufficiently large  $n$  and constant  $R$ . Note that  
1024 under the null hypothesis, it holds that  $X \sim N(0, I_d)$  and  $Y$  is independent of  $X$ . Therefore, it  
1025 follows from (D.37) that

$$\mathbb{E}_0[\tilde{q}_{1,v}(Y, X)] = \mathbb{E}_0[\tilde{q}_{2,v}(Y, X)] = 0, \quad (\text{D.44})$$

1026 which holds for all  $v \in \mathcal{N}(1/2)$ . Meanwhile, following from the definition of  $\mathcal{N}(1/2)$  in (D.5), it  
1027 holds that for any  $\beta^* \in \mathcal{H}(s, \gamma_n)$ , there exist a  $v^* \in \mathcal{N}(1/2)$  such that

$$\|\beta^*/\sqrt{s\rho^2} - v^*\|_2^2 \leq 1/4,$$

1028 which is equivalent to

$$v^{*\top} \beta^* \geq 7/8 \cdot \sqrt{s\rho^2}. \quad (\text{D.45})$$

1029 Therefore, following from (A.3) and (D.45), it holds that

$$\begin{aligned}49/64 \cdot s\rho^2 - \mathbb{E}_{\mathbb{P}_{\beta^*}}[\tilde{q}_{1,v^*}(Y, X)] &\leq (v^{*\top} \beta^*)^2 - \mathbb{E}_{\mathbb{P}_{\beta^*}}[\tilde{q}_{1,v^*}(Y, X)] \\ &\leq \mathbb{E}_{\mathbb{P}_{\beta^*}}[\psi(Y) \cdot ((v^{*\top} X)^2 - 1) - \tilde{q}_{1,v^*}(Y, X)] \\ &= \mathbb{E}_{\mathbb{P}_{\beta^*}}[\psi(Y) \cdot ((v^{*\top} X)^2 - 1) \cdot \mathbb{1}\{|\psi(Y)| > (R \cdot \log n)^{1/\nu}\}] \\ &\leq \sqrt{\mathbb{E}_{\mathbb{P}_{\beta^*}}[\psi^2(Y) \cdot ((v^{*\top} X)^2 - 1)^2]} \cdot \sqrt{\mathbb{P}_{\beta^*}(|\psi(Y)| > (R \cdot \log n)^{1/\nu})},\end{aligned}\quad (\text{D.46})$$

1030 where the last inequality follows from the Cauchy-Schwartz inequality. It then follows from the  
1031 Cauchy-Schwartz inequality and Assumption A.1 that

$$49/64 \cdot s\rho^2 - \mathbb{E}_{\mathbb{P}_{\beta^*}}[\tilde{q}_{1,v^*}(Y, X)] \leq C \cdot \exp(-R/2 \cdot \log n), \quad (\text{D.47})$$

where  $C$  is a positive absolute constant. If it holds that  $s\rho^2/\sigma^2 = \Omega(\sqrt{s \log d}/n)$ , we obtain that for sufficiently large  $n$  and constant  $R$ , it holds that  $s\rho^2/64 > 1/n$  and

$$49/64 \cdot s\rho^2 - \mathbb{E}_{\mathbb{P}_{\beta^*}} [\tilde{q}_{1,v^*}(Y, X)] \leq 1/64 \cdot s\rho^2. \quad (\text{D.48})$$

In other words, it holds that  $\mathbb{E}_{\mathbb{P}_{\beta^*}} [\tilde{q}_{1,v^*}(Y, X)] \geq 3/4 \cdot s\rho^2$ . Similarly, following from (A.4) and (D.45), we obtain

$$\begin{aligned} 7/8 \cdot \sqrt{\alpha^2 s\rho^2} - \mathbb{E}_{\mathbb{P}_{\beta^*}} [\tilde{q}_{2,v^*}(Y, X)] &\leq \alpha \cdot v^{*\top} \beta^* - \mathbb{E}_{\mathbb{P}_{\beta^*}} [\tilde{q}_{2,v^*}(Y, X)] \\ &\leq \mathbb{E}_{\mathbb{P}_{\beta^*}} [Y \cdot (v^{*\top} X) - \tilde{q}_{1,v}(Y, X)] \\ &= \mathbb{E}_{\mathbb{P}_{\beta^*}} [Y \cdot (v^{*\top} X) \cdot \mathbb{1}\{|Y| > (R \cdot \log n)^{1/\nu}\}] \\ &\leq \sqrt{\mathbb{E}_{\mathbb{P}_{\beta^*}} [Y^2 \cdot (v^{*\top} X)^2]} \cdot \sqrt{\mathbb{P}_{\beta^*}(|Y| > (R \cdot \log n)^{1/\nu})}. \end{aligned} \quad (\text{D.49})$$

Then following from the Cauchy-Schwartz inequality and Assumption A.1, we obtain that

$$7/8 \cdot \sqrt{\alpha^2 s\rho^2} - \mathbb{E}_{\mathbb{P}_{\beta^*}} [\tilde{q}_{2,v^*}(Y, X)] \leq C' \cdot \exp(-R/2 \cdot \log n), \quad (\text{D.50})$$

where  $C'$  is a positive absolute constant. If it holds that  $s\rho^2/\sigma^2 = \Omega(1/\alpha \cdot s \log d/n)$ , we obtain that for sufficiently large  $n$  and constant  $R$ , it holds that  $\sqrt{\alpha^2 s\rho^2}/8 > 1/n$  and

$$7/8 \cdot \sqrt{\alpha^2 s\rho^2} - \mathbb{E}_{\mathbb{P}_{\beta^*}} [\tilde{q}_{2,v^*}(Y, X)] \leq 1/8 \cdot \sqrt{\alpha^2 s\rho^2}. \quad (\text{D.51})$$

In other words, it holds that  $\mathbb{E}_{\mathbb{P}_{\beta^*}} [\tilde{q}_{2,v^*}(Y, X)] \geq 3/4 \cdot \sqrt{\alpha^2 s\rho^2}$ . Combining (D.43), (D.48), and (D.51), we conclude that for sufficiently large  $n$  and constant  $R$ , it holds that

$$\mathbb{E}_{\mathbb{P}_0} [q_{1,v}(Y, X)] \leq 1/n, \quad \mathbb{E}_{\mathbb{P}_0} [q_{2,v}(Y, X)] \leq 1/n.$$

Furthermore, it holds for sufficiently large  $n$  and constant  $R$  that

$$\begin{aligned} \sup_{v \in \mathcal{N}(1/2)} \mathbb{E}_{\mathbb{P}_{\beta^*}} [q_{1,v}(Y, X)] &\geq \mathbb{E}_{\mathbb{P}_{\beta^*}} [q_{1,v^*}(Y, X)] \geq s\rho^2/2, \quad \text{if } s\rho^2/\sigma^2 = \Omega(\sqrt{s \log d}/n), \\ \sup_{v \in \mathcal{N}(1/2)} \mathbb{E}_{\mathbb{P}_{\beta^*}} [q_{2,v}(Y, X)] &\geq \mathbb{E}_{\mathbb{P}_{\beta^*}} [q_{2,v^*}(Y, X)] \geq \sqrt{\alpha^2 s\rho^2}/2, \quad \text{if } s\rho^2/\sigma^2 = \Omega(1/\alpha^2 \cdot s \log d/n), \end{aligned}$$

which concludes the proof of Lemma D.3.  $\square$

#### D.4 Proof of Lemma D.4

*Proof.* In the following proof, we denote by  $C$  and  $C'$  absolute constants, the value of which may vary from lines to lines. We define the following query functions,

$$\begin{aligned} \tilde{q}_{1,j}(Y, X) &= \psi(Y) \cdot (X_j^2 - 1) \cdot \mathbb{1}\{|\psi(Y)| \leq (R \cdot \log n)^{1/\nu}\}, \quad j \in [d], \\ \tilde{q}_{2,j}(Y, X) &= Y X_j \cdot \mathbb{1}\{|Y| \leq (R \cdot \log n)^{1/\nu}\}, \quad j \in [d]. \end{aligned} \quad (\text{D.52})$$

Following from (D.13) and the Cauchy-Schwartz inequality, it holds that

$$|\mathbb{E}_{\mathbb{P}_0} [\tilde{q}_{1,j}(Y, X) - q_{1,j}(Y, X)]|^2 \leq \mathbb{E}_{\mathbb{P}_0} [\psi^2(Y) \cdot (X_j^2 - 1)^2] \cdot \mathbb{P}_0(|X_j| \geq R \cdot \sqrt{\log n}). \quad (\text{D.53})$$

Note that under the null hypothesis,  $Y$  is independent of  $X$  and  $X \sim N(0, I_d)$ . Then following from Assumption A.1 and the tail bound of standard Gaussian distribution in (C.54), it holds that

$$|\mathbb{E}_{\mathbb{P}_0} [\tilde{q}_{1,j}(Y, X) - q_{1,j}(Y, X)]|^2 \leq C \cdot \exp(-R^2 \cdot \log n), \quad (\text{D.54})$$

where  $C$  is a positive absolute constant. Under the alternative hypothesis, it holds that

$$|\mathbb{E}_{\mathbb{P}_{\beta^*}} [\tilde{q}_{1,j}(Y, X) - q_{1,j}(Y, X)]|^2 \leq \mathbb{E}_{\mathbb{P}_{\beta^*}} [\psi^2(Y) \cdot (X_j^2 - 1)^2] \cdot \mathbb{P}_{\beta^*}(|X_j| \geq R \cdot \sqrt{\log n}) \quad (\text{D.55})$$

$$\leq \sqrt{\mathbb{E}_{\mathbb{P}_{\beta^*}} [\psi^4(Y)] \cdot \mathbb{E}_{\mathbb{P}_{\beta^*}} [(X_j^2 - 1)^4]} \cdot \mathbb{P}_{\beta^*}(|X_j| \geq R \cdot \sqrt{\log n}),$$

where the above inequalities follows from the Cauchy-Schwartz inequality. Note that under the alternative hypothesis, we have  $X \sim N(0, I_d)$ . Then following from Assumption A.1 and the tail bound of standard Gaussian distribution in (C.54), it holds that

$$|\mathbb{E}_{\mathbb{P}_{\beta^*}} [\tilde{q}_{1,j}(Y, X) - q_{1,j}(Y, X)]|^2 \leq C' \cdot \exp(-R^2 \cdot \log n), \quad (\text{D.56})$$

1053 where  $C'$  is a positive absolute constant. Similar argument holds for  $q_{2,j}(Y, X)$ . Combining (D.54),  
 1054 (D.56), and a similar argument on  $q_{2,j}(Y, X)$ , we obtain that

$$\begin{aligned} & |\mathbb{E}_{\mathbb{P}_0} [q_{1,j}(Y, X) - \tilde{q}_{1,j}(Y, X)]| \vee |\mathbb{E}_{\mathbb{P}_{\beta^*}} [q_{1,j}(Y, X) - \tilde{q}_{1,j}(Y, X)]| \leq 1/n, \\ & |\mathbb{E}_{\mathbb{P}_0} [q_{2,j}(Y, X) - \tilde{q}_{2,j}(Y, X)]| \vee |\mathbb{E}_{\mathbb{P}_{\beta^*}} [q_{2,j}(Y, X) - \tilde{q}_{2,j}(Y, X)]| \leq 1/n, \end{aligned} \quad (\text{D.57})$$

1055 which holds for  $j \in [d]$ ,  $\beta^* \in \mathcal{H}(s, \gamma_n)$ , and sufficiently large  $n$  and constant  $R$ . Note that under the  
 1056 null hypothesis, it holds that  $X \sim N(0, I_d)$  and  $Y$  is independent of  $X$ . Therefore, following from  
 1057 (D.52), we obtain

$$\mathbb{E}_{\mathbb{P}_0} [\tilde{q}_{1,j}(Y, X)] = \mathbb{E}_{\mathbb{P}_0} [\tilde{q}_{2,j}(Y, X)] = 0. \quad (\text{D.58})$$

1058 Meanwhile, under the alternative hypothesis, it follows from (A.3) that

$$\begin{aligned} & \beta_j^{*2} - \mathbb{E}_{\mathbb{P}_{\beta^*}} [\tilde{q}_{1,j}(Y, X)] \\ & \leq \mathbb{E}_{\mathbb{P}_{\beta^*}} [\psi(Y) \cdot (X_j^2 - 1) \cdot \mathbb{1}\{|\psi(Y)| > (R \cdot \log n)^{1/\nu}\}] \\ & \leq \sqrt{\mathbb{E}_{\mathbb{P}_{\beta^*}} [\psi^2(Y) \cdot (X_j^2 - 1)^2]} \cdot \sqrt{\mathbb{P}_{\beta^*}(|\psi(Y)| > (R \cdot \log n)^{1/\nu})} \\ & \leq \left( \mathbb{E}_{\mathbb{P}_{\beta^*}} [\psi^4(Y)] \cdot \mathbb{E}_{\mathbb{P}_{\beta^*}} [(X_j^2 - 1)^4] \right)^{1/4} \cdot \sqrt{\mathbb{P}_{\beta^*}(|\psi(Y)| > (R \cdot \log n)^{1/\nu})}, \end{aligned} \quad (\text{D.59})$$

1059 where we denote by  $\beta_j^*$  the  $j$ -th entry of  $\beta^*$ , and the above inequalities follow from the Cauchy-  
 1060 Schwartz inequality. Then following from Assumption A.1 and the fact that  $X \sim N(0, I_d)$  under the  
 1061 alternative hypothesis, we obtain that

$$\beta_j^{*2} - \mathbb{E}_{\mathbb{P}_{\beta^*}} [\tilde{q}_{1,j}(Y, X)] \leq C \cdot \exp(-R/2 \cdot \log n), \quad (\text{D.60})$$

1062 where  $C$  is a positive absolute constant. Note that  $\|\beta^*\|_2^2 = s\rho^2$  and  $\|\beta^*\|_0 = s$ . Therefore, we  
 1063 obtain that

$$\sup_{j \in [d]} |\beta_j^*| \geq \rho. \quad (\text{D.61})$$

1064 Following from (D.60) and (D.61), if it holds that  $s\rho^2/\sigma^2 = \Omega(\sqrt{s^2 \log d/n})$ , then for sufficiently  
 1065 large  $n$  and constant  $R$ , we obtain that  $\rho^2/4 > 1/n$  and

$$\sup_{j \in [d]} \mathbb{E}_{\mathbb{P}_{\beta^*}} [\tilde{q}_{1,j}(Y, X)] \geq 3\rho^2/4. \quad (\text{D.62})$$

1066 Similar argument holds for  $\tilde{q}_{2,j}(Y, X)$ . Following from (A.4), we obtain that under the alternative  
 1067 hypothesis, it holds that

$$\alpha\beta_j^* - \mathbb{E}_{\mathbb{P}_{\beta^*}} [\tilde{q}_{2,j}(Y, X)] = \mathbb{E}_{\mathbb{P}_{\beta^*}} [\psi(Y) \cdot X_j \cdot \mathbb{1}\{|\psi(Y)| > (R \cdot \log n)^{1/\nu}\}]. \quad (\text{D.63})$$

1068 Meanwhile, it follows from the Cauchy-Schwartz inequality that

$$\begin{aligned} & \left| \mathbb{E}_{\mathbb{P}_{\beta^*}} [Y \cdot X_j \cdot \mathbb{1}\{|Y| > (R \cdot \log n)^{1/\nu}\}] \right|^2 \leq \mathbb{E}_{\mathbb{P}_{\beta^*}} [Y^2 \cdot X_j^2] \cdot \mathbb{P}_{\beta^*}(|Y| > (R \cdot \log n)^{1/\nu}) \\ & \leq \sqrt{\mathbb{E}_{\mathbb{P}_{\beta^*}} [Y^4] \cdot \mathbb{E}_{\mathbb{P}_{\beta^*}} [X_j^4]} \cdot \mathbb{P}_{\beta^*}(|Y| > (R \cdot \log n)^{1/\nu}) \\ & \leq C' \cdot \exp(-R \log n), \end{aligned} \quad (\text{D.64})$$

1069 where the last inequality follows from Assumption A.1 and the fact that  $X \sim N(0, I_d)$  under  
 1070 the alternative hypothesis. Combining (D.61), (D.63), and (D.64), we obtain that for  $s\rho^2/\sigma^2 =$   
 1071  $\Omega(1/\alpha^2 \cdot s \log d/n)$ , it holds for sufficiently large  $n$  and constant  $R$  that  $\alpha\rho/4 > 1/n$  and

$$\sup_{j \in [d]} |\mathbb{E}_{\mathbb{P}_{\beta^*}} [\tilde{q}_{2,j}(Y, X)]| \geq 3\alpha\rho/4. \quad (\text{D.65})$$

1072 Combining (D.57), (D.62), and (D.65), we obtain that for sufficiently large  $n$  and constant  $R$ , it holds  
 1073 that

$$\sup_{j \in [d]} \mathbb{E}_{\mathbb{P}_0} [q_{1,j}(Y, X)] \leq 1/n, \quad \sup_{j \in [d]} \mathbb{E}_{\mathbb{P}_0} [q_{1,j}(Y, X)] \leq 1/n. \quad (\text{D.66})$$

1074 Moreover, for sufficiently large  $n$  and constant  $R$ , it holds that

$$\begin{aligned} & \sup_{j \in [d]} \mathbb{E}_{\mathbb{P}_{\beta^*}} [q_{1,j}(Y, X)] \geq \rho^2/2 \text{ if } s\rho^2/\sigma^2 = \Omega(\sqrt{s \log d/n}), \\ & \sup_{j \in [d]} \mathbb{E}_{\mathbb{P}_{\beta^*}} [q_{2,j}(Y, X)] \geq \alpha\rho/2 \text{ if } s\rho^2/\sigma^2 = \Omega(1/\alpha^2 \cdot s \log d/n), \end{aligned} \quad (\text{D.67})$$

1075 which concludes the proof of Lemma D.4.  $\square$
