# Supplementary material
Source: ML conference proceedings conference paper supplement (https://proceedings.neurips.cc/paper_files/paper/2019/hash/13d4635deccc230c944e4ff6e03404b5-Abstract.html)
Supplement: Supplementary file [file 13d4635deccc230c944e4ff6e03404b5-Supplemental.zip]

## 472 A Upper bounds

473 In this section, we establish upper bounds that attain the lower bounds obtained in Proposition 3.1 and  
 474 Theorem A.2 up to logarithmic factors. Based on the lower bounds and upper bounds, we obtain the  
 475 minimax and computational minimax separation rates defined in Definitions 2.2 and 2.4, respectively.

476 Recall that the hypothesis testing problem in (2.7) takes the form

$$H_0: Y = \epsilon_0 \text{ versus } H_1: Y = \begin{cases} f_1(X^\top \beta^*) + \epsilon, & \text{with probability } \alpha, \\ f_2(X^\top \beta^*) + \epsilon, & \text{with probability } 1 - \alpha. \end{cases} \quad (\text{A.1})$$

477 Here  $\epsilon$  is a Gaussian noise with variance  $\sigma^2$  and  $\epsilon_0$  is a noise such that the variances of  $Y$  under the  
 478 null and alternative hypotheses are the same. Besides,  $f_1 \in \mathcal{C}_1 \cap \mathcal{C}(\psi)$  and  $f_2 \in \mathcal{C}_2 \cap \mathcal{C}(\psi)$  are two  
 479 unknown link functions, where  $\mathcal{C}_1(\psi)$ ,  $\mathcal{C}_2(\psi)$ , and  $\mathcal{C}(\psi)$  are defined in (2.4) and (2.5). Meanwhile,  
 480 we set  $X \sim N(0, I_d)$  and  $\beta^*$  to be  $s$ -sparse. For the simplicity of the following discussions, we  
 481 restrict to the set of  $\beta^*$  such that  $\beta^* = \rho \cdot v^*$ , where  $v^* \in \bar{\mathcal{G}}(s) = \{v \in \{-1, 0, 1\}^d : \|v\|_0 = s\}$ .  
 482 We further define

$$\bar{\mathcal{G}}_1(s, \gamma_n) = \{(\beta^*, \sigma) \in \mathbb{R}^{d+1} : \beta^* = \rho \cdot v^*, v^* \in \bar{\mathcal{G}}(s), \kappa(\beta^*, \sigma) \geq \gamma_n\}.$$

483 We highlight the fact that such a restricted parameter set is sufficient to characterize the difficulty of  
 484 the hypothesis testing problem in (2.7), and defer the proof of the general case to §D.

485 Let  $Z = (Y, X)$  and  $\mathbb{P}_0, \mathbb{P}_{v^*}$  be the distributions of  $Z$  under the null and alternative hypotheses,  
 486 respectively. We introduce the following assumption on  $Y$  and  $\psi(Y)$  under the alternative hypothesis,  
 487 which regulates the tail and moment of  $Y$  and  $\psi(Y)$ .

488 **Assumption A.1.** We assume that  $Y$  and  $\psi(Y)$  have bounded fourth moments. We further assume  
 489 that under the alternative hypothesis,  $Y$  and  $\psi(Y)$  have desired tail bounds in the form of

$$\mathbb{P}_{v^*}(|Y| \geq R) \leq C \exp(-R^\nu), \quad \mathbb{P}_{v^*}(|\psi(Y)| \geq R) \leq C' \exp(-R^\nu), \quad (\text{A.2})$$

490 which holds for a sufficiently large  $R$  and positive absolute constants  $C, C'$ , and  $\nu$ .

491 Assumption A.1 is required only for the upper bounds. It is needed to construct bounded query  
 492 functions defined in Definition 2.3. Such an assumption is a mild regularity condition in the sense  
 493 that it holds for the linear regression model and most of the phase retrieval models. For instance, let  
 494  $(Y, X)$  be generated by the mixed regression model and  $\psi(Y) = Y^2$ . Then  $Y$  follows the mixture of  
 495 Gaussian distributions. Therefore,  $Y$  has bounded fourth moment and Gaussian tail, and  $\psi(Y) = Y^2$   
 496 is sub-exponential under the alternative hypothesis with bounded fourth moment. Hence, the tail  
 497 bound stated in (A.2) holds for  $Y$  and  $\psi(Y)$  with  $\nu = 1$ . Similar arguments hold for the linear  
 498 regression model and the phase retrieval models  $Y = |X^\top \beta^*| + \epsilon$  and  $Y = (X^\top \beta^*)^2 + \epsilon$ .

499 In what follows, we design the test function  $\phi$  based on the first-order and second-order Stein's  
 500 identities in (2.2) and (2.3). Following from (2.5), it holds that  $S_2(Y, \psi) \geq \|\beta^*\|_2^4$  under the  
 501 alternative hypothesis. It then follows from the second-order Stein's identity in (2.3) that  $\mathbb{E}_{\mathbb{P}_{v^*}}[\psi(Y) \cdot$   
 502  $(XX^\top - I)] \succeq \beta^* \beta^{*\top}$  under the alternative hypothesis. Meanwhile, under the null hypothesis,  $\psi(Y)$   
 503 is independent of  $X$ . Therefore, it holds that

$$\mathbb{E}_{\mathbb{P}_{v^*}}[v^\top \psi(Y) \cdot (XX^\top - I)v] \geq (v^\top \beta^*)^2, \quad \mathbb{E}_{\mathbb{P}_0}[\psi(Y) \cdot (XX^\top - I)] = 0. \quad (\text{A.3})$$

504 Meanwhile, following from (2.4), it holds that  $\mathbb{E}[Y_1 X] = \beta^*$  with  $Y_1 = f_1(X^\top \beta^*, \epsilon)$ . Therefore, it  
 505 follows from the first-order Stein's identity in (2.2) that

$$\mathbb{E}_{\mathbb{P}_{v^*}}[v^\top Y X] = \alpha \cdot v^\top \beta^*, \quad \mathbb{E}_{\mathbb{P}_0}[Y X] = 0. \quad (\text{A.4})$$

506 We introduce the following query functions,

$$q_{1,v}(Y, X) = \psi(Y) \cdot [s^{-1}(v^\top X)^2 - 1] \cdot \mathbb{1}\{|\psi(Y)| \leq (R \log n)^{1/\nu}\} \cdot \mathbb{1}\{|v^\top X| \leq R \cdot \sqrt{s \log n}\},$$

$$q_{2,v}(Y, X) = Y \cdot (s^{-1/2} v^\top X) \cdot \mathbb{1}\{|Y| \leq (R \log n)^{1/\nu}\} \cdot \mathbb{1}\{|v^\top X| \leq R \cdot \sqrt{s \log n}\}. \quad (\text{A.5})$$

507 We denote by  $\bar{Z}_{1,v}$  and  $\bar{Z}_{2,v}$  the responses of the statistical oracle to query functions  $q_{1,v}$  and  $q_{2,v}$ , as  
 508 defined in Definition 2.3. We define the test functions  $\phi_1$  and  $\phi_2$  as

$$\phi_1 = \mathbb{1}\left\{\sup_{v \in \bar{\mathcal{G}}(s)} \bar{Z}_{1,v} \geq \tau_1\right\}, \quad \phi_2 = \mathbb{1}\left\{\sup_{v \in \bar{\mathcal{G}}(s)} \bar{Z}_{2,v} \geq \tau_2\right\}, \quad (\text{A.6})$$

509 where we set the thresholds  $\tau_1$  and  $\tau_2$  to be

$$\tau_1 = CR^{2+1/\nu} \cdot (\log n)^{1+1/\nu} \cdot \sqrt{\frac{s \log d}{n}}, \quad \tau_2 = C'R^{1+1/\nu} \cdot (\log n)^{1/2+1/\nu} \cdot \sqrt{\frac{s \log d}{n}}. \quad (\text{A.7})$$

Here  $C$  and  $C'$  are absolute constants (which are specified in §B.3). We define the test function as  $\phi = \phi_1 \vee \phi_2$ . The following theorem characterizes an upper bound for the minimax separation rate by quantifying the SNR for  $\phi$  to be asymptotically powerful, which attains the information-theoretic lower bound in Proposition 3.1 up to logarithmic factors.

**Theorem A.2.** We consider the hypothesis testing problem in (A.1) under Assumption A.1. For

$$\gamma_n = \Omega\left((\log n)^{1+1/\nu} \cdot \sqrt{\frac{s \log d}{n}} \bigwedge \frac{(\log n)^{1+2/\nu}}{\alpha^2} \cdot \frac{s \log d}{n}\right), \quad (\text{A.8})$$

it holds that  $R_n(\phi; \mathcal{G}_0, \bar{\mathcal{G}}_1) = O(1/d)$ . In other words,  $\phi$  is asymptotically powerful.

*Proof.* See §B.3 for a detailed proof.  $\square$

It follows from Theorem A.2 that any sequence satisfying (i) of Definition 2.2 is asymptotically upper bounded by any sequence that satisfies (A.8). As a result, it holds that

$$\gamma_n^* = o\left((\log n)^{1+1/\nu} \cdot \sqrt{\frac{s \log d}{n}} \bigwedge \frac{(\log n)^{1+2/\nu}}{\alpha^2} \cdot \frac{s \log d}{n}\right). \quad (\text{A.9})$$

Based on (3.2) and (A.9), up to logarithmic factors, the minimax separation rate defined in Definition 2.2 takes the form

$$\gamma_n^* = \sqrt{\frac{s \log d}{n}} \bigwedge \frac{1}{\alpha^2} \cdot \frac{s \log d}{n}. \quad (\text{A.10})$$

Note that the query functions in (A.5) have exponential oracle complexity, since searching over the parameter set  $\bar{\mathcal{G}}(s)$  requires querying the statistical oracle  $T = \binom{d}{s} \cdot 2^s$  rounds. To construct a computationally tractable test, we design query functions that access each entry  $X_j$  of  $X$ ,

$$\begin{aligned} q_{1,j}(Y, X) &= \psi(Y) \cdot (X_j^2 - 1) \cdot \mathbb{1}\{|\psi(Y)| \leq (R \log n)^{1/\nu}\} \cdot \mathbb{1}\{|X_j| \leq R\sqrt{\log n}\}, \quad j \in [d] \\ q_{2,j}(Y, X) &= Y \cdot X_j \cdot \mathbb{1}\{|Y| \leq (R \log n)^{1/\nu}\} \cdot \mathbb{1}\{|X_j| \leq R\sqrt{\log n}\}, \quad j \in [d]. \end{aligned} \quad (\text{A.11})$$

We denote by  $\bar{Z}_{1,j}$  and  $\bar{Z}_{2,j}$  the responses of the statistical oracle to the query functions  $q_{1,j}$  and  $q_{2,j}$ , as defined in Definition 2.3. We define the test functions  $\tilde{\phi}_1$  and  $\tilde{\phi}_2$  as

$$\tilde{\phi}_1 = \mathbb{1}\left\{\sup_{j \in [d]} \bar{Z}_{1,j} \geq \tilde{\tau}_1\right\}, \quad \tilde{\phi}_2 = \mathbb{1}\left\{\sup_{j \in [d]} \bar{Z}_{2,j} \geq \tilde{\tau}_2\right\} \bigvee \mathbb{1}\left\{\inf_{j \in [d]} \bar{Z}_{2,j} \leq -\tilde{\tau}_2\right\}, \quad (\text{A.12})$$

where we set the thresholds  $\tilde{\tau}_1$  and  $\tilde{\tau}_2$  to be

$$\tilde{\tau}_1 = CR^{2+1/\nu}(\log n)^{1+1/\nu} \cdot \sqrt{\frac{\log d}{n}}, \quad \tilde{\tau}_2 = C'R^{1+1/\nu}(\log n)^{1/2+1/\nu} \cdot \sqrt{\frac{\log d}{n}}. \quad (\text{A.13})$$

Finally, we define the test function to be  $\tilde{\phi} = \tilde{\phi}_1 \vee \tilde{\phi}_2$ . By the definition of  $\phi_1$  and  $\phi_2$  in (A.12), the test function  $\tilde{\phi}$  is computationally tractable with query complexity  $T = 2d$ . The following theorem characterizes an upper bound for the computational minimax separation rate, which attains the computational lower bound in Theorem 3.2 up to logarithmic factors.

**Theorem A.3.** We consider the hypothesis testing problem in (A.1) under Assumption A.1. For

$$\gamma_n = \Omega\left((\log n)^{1+1/\nu} \cdot \sqrt{\frac{s^2 \log d}{n}} \bigwedge \frac{(\log n)^{1+2/\nu}}{\alpha^2} \cdot \frac{s \log d}{n}\right), \quad (\text{A.14})$$

it holds that  $\bar{R}_n(\tilde{\phi}; \mathcal{G}_0, \bar{\mathcal{G}}_1) = O(1/d)$ . In other words,  $\tilde{\phi}$  is asymptotically powerful.

*Proof.* See §B.4 for a detailed proof.  $\square$

It follows from Theorem A.3 that any sequence satisfying (i) of Definition 2.4 is asymptotically upper bounded by any sequence that satisfies (A.14). As a result, it holds that

$$\bar{\gamma}_n^* = o\left((\log n)^{1+1/\nu} \cdot \sqrt{\frac{s^2 \log d}{n}} \bigwedge \frac{(\log n)^{1+2/\nu}}{\alpha^2} \cdot \frac{s \log d}{n}\right). \quad (\text{A.15})$$

Based on (3.5) and (A.15), up to logarithmic factors, the computational minimax separation rate defined in Definition 2.4 takes the form

$$\bar{\gamma}_n^* = \sqrt{\frac{s^2}{n}} \bigwedge \frac{1}{\alpha^2} \cdot \frac{s \log d}{n}. \quad (\text{A.16})$$

## B Proof of Main Results

In this section, we lay out the proofs of the main results in §3 and §A.

### B.1 Proof of Proposition 3.1

*Proof.* We have the following lower bound of minimax risk,

$$\begin{aligned} R_n^*(\mathcal{G}_0, \mathcal{G}_1) &= \inf_{\phi} \sup_{f_1, f_2, \psi} R_n(\phi; \mathcal{G}_0, \mathcal{G}_1) \geq \inf_{\phi} R_n(\phi; \mathcal{G}_0, \mathcal{G}_1) \\ &= \inf_{\phi} \left\{ \sup_{\theta^* \in \mathcal{G}_0} \mathbb{P}_{\theta^*}(\phi = 1) + \sup_{\theta^* \in \mathcal{G}_1} \mathbb{P}_{\theta^*}(\phi = 0) \right\}. \end{aligned}$$

where the first inequality is obtained by restricting  $f_1$ ,  $f_2$ , and  $\psi$  in the testing problem in (2.7) as follows. We set  $\psi(y) = y^2$  and the sample  $\{z_i\}_{i \in [n]}$  to be generated from a mixture of the linear regression model  $Y_1 = f_1(X^\top \beta^*) + \epsilon = X^\top \beta^* + \epsilon$  and the mixed regression model  $Y_2 = f_2(X^\top \beta^*) + \epsilon = \eta \cdot X^\top \beta^* + \epsilon$ . Here we set  $\epsilon \sim N(0, \sigma^2)$  and  $\eta$  to be a Rademacher random variable, which is independent of both  $X$  and  $\epsilon$ . Since  $S_1(Y_1) = \|\beta^*\|_2^2$ ,  $S_1(Y_2) = 0$ , and  $S_2(Y_1, \psi) = S_2(Y_2, \psi) = 2\|\beta^*\|_2^4$ , we have  $f_1 \in \mathcal{C}_1 \cap \mathcal{C}(\psi)$  and  $f_2 \in \mathcal{C}_2 \cap \mathcal{C}(\psi)$ , where  $\mathcal{C}_1$ ,  $\mathcal{C}_2$ , and  $\mathcal{C}(\psi)$  are defined in (2.4) and (2.5).

We further restrict the parameter space of  $\theta^* = (\beta^*, \sigma)$  as follows. Let  $\beta^* \in \{\beta = \rho \cdot v : v \in \mathcal{G}(s)\}$ , where  $\rho$  is a positive constant and  $\mathcal{G}(s) = \{v \in \{0, 1\}^d : \|v\|_0 = s\}$ . Therefore, the original hypothesis testing problem is reduced to

$$H_0: Y = \epsilon_0 \text{ versus } H_1: Y = \begin{cases} X^\top \beta^* + \epsilon, & \text{with probability } \alpha, \\ \eta \cdot X^\top \beta^* + \epsilon, & \text{with probability } 1 - \alpha, \end{cases} \quad (\text{B.1})$$

where under  $H_0$  we have  $\epsilon_0 \sim N(0, \sigma^2 + s\rho^2)$  and under  $H_1$  we have  $\epsilon \sim N(0, \sigma^2)$ . We denote by  $\mathbb{P}_0$  and  $\mathbb{P}_{v^*}$  the probability distributions of  $Z = (Y, X)$  under the null and alternative hypotheses with  $\beta^* = \rho \cdot v^*$ , respectively. In addition, we define  $\bar{\mathbb{P}} = |\mathcal{G}(s)|^{-1} \sum_{v \in \mathcal{G}(s)} \mathbb{P}_v^n$ , where we use the superscript  $n$  to denote the  $n$ -fold product probability measure. By Neyman-Pearson lemma, we have

$$\begin{aligned} R_n^*(\mathcal{G}_0, \mathcal{G}_1) &\geq \inf_{\phi} [\mathbb{P}_0^n(\phi = 1) + \bar{\mathbb{P}}(\phi = 0)] = 1 - 1/2 \cdot \mathbb{E}_{\mathbb{P}_0^n} [|\text{d}\bar{\mathbb{P}}/\text{d}\mathbb{P}_0^n - 1|] \\ &\geq 1 - 1/2 \cdot \left( (\mathbb{E}_{\mathbb{P}_0^n} [\text{d}\bar{\mathbb{P}}/\text{d}\mathbb{P}_0^n])^2 - 1 \right)^{1/2}, \end{aligned} \quad (\text{B.2})$$

where the second inequality follows from the Cauchy-Schwarz inequality. In what follows, we show that  $\mathbb{E}_{\mathbb{P}_0^n} [\text{d}\bar{\mathbb{P}}/\text{d}\mathbb{P}_0^n]^2 = 1 + o(1)$  under the condition in (3.1), which implies  $\liminf_{n \rightarrow \infty} R_n^*(\mathcal{G}_0, \mathcal{G}_1) \geq 1 - o(1)$  by (B.2). Note that on the right-hand side of (B.2), we have

$$(\mathbb{E}_{\mathbb{P}_0^n} [\text{d}\bar{\mathbb{P}}/\text{d}\mathbb{P}_0^n])^2 = \frac{1}{|\mathcal{G}(s)|^2} \sum_{v, v' \in \mathcal{G}(s)} \mathbb{E}_{\mathbb{P}_0^n} \left[ \frac{\text{d}\mathbb{P}_v^n}{\text{d}\mathbb{P}_0^n} \frac{\text{d}\mathbb{P}_{v'}^n}{\text{d}\mathbb{P}_0^n} (Z_1, \dots, Z_n) \right], \quad (\text{B.3})$$

where  $Z_i$  are independent copies of  $Z = (Y, X)$ . The following lemma establishes an upper bound of the right-hand side of (B.3).

**Lemma B.1.** For any  $v_1, v_2 \in \mathcal{G}(s)$ , if  $s\rho^2 = o(1)$ , it holds that

$$\mathbb{E}_{\mathbb{P}_0} \left[ \frac{\text{d}\mathbb{P}_{v_1}}{\text{d}\mathbb{P}_0} \frac{\text{d}\mathbb{P}_{v_2}}{\text{d}\mathbb{P}_0} (Z) \right] \leq \cosh \left( \frac{2\rho^2 \langle v_1, v_2 \rangle}{\sigma^2 + s\rho^2} \right) + \alpha^2 \sinh \left( \frac{2\rho^2 \langle v_1, v_2 \rangle}{\sigma^2 + s\rho^2} \right). \quad (\text{B.4})$$

*Proof.* See §C.1 for a detailed proof. □

Following from Lemma B.1, it holds that

$$\begin{aligned} \mathbb{E}_{\mathbb{P}_0^n} \left[ \frac{\text{d}\mathbb{P}_{v_1}^n}{\text{d}\mathbb{P}_0^n} \frac{\text{d}\mathbb{P}_{v_2}^n}{\text{d}\mathbb{P}_0^n} (Z_1, \dots, Z_n) \right] &= \left( \mathbb{E}_{\mathbb{P}_0} \left[ \frac{\text{d}\mathbb{P}_{v_1}}{\text{d}\mathbb{P}_0} \frac{\text{d}\mathbb{P}_{v_2}}{\text{d}\mathbb{P}_0} (Z) \right] \right)^n \\ &\leq \left[ \cosh \left( \frac{2\rho^2 \langle v_1, v_2 \rangle}{\sigma^2 + s\rho^2} \right) + \alpha^2 \sinh \left( \frac{2\rho^2 \langle v_1, v_2 \rangle}{\sigma^2 + s\rho^2} \right) \right]^n, \end{aligned} \quad (\text{B.5})$$

where  $Z_i$  are independent copies of  $Z = (Y, X)$ . The following lemma by [62] establishes an upper bound of the right-hand side in (B.5).

566 **Lemma B.2** ([62]). For any  $x \geq 0$  and  $0 \leq k \leq 1$ , we have,  

$$\cosh(x) + k \sinh(x) \leq \exp(2kx) \vee \cosh(2x).$$

567 *Proof.* See the appendix of [62] for a detailed proof.  $\square$

568 Following from (B.3), (B.5), and Lemma B.2, we conclude

$$\left(\mathbb{E}_{\mathbb{P}_0^n}[\mathrm{d}\bar{\mathbb{P}}/\mathrm{d}\mathbb{P}_0^n]\right)^2 \leq \frac{1}{|\mathcal{G}(s)|^2} \sum_{v_1, v_2 \in \mathcal{G}(s)} \left[ \exp\left(\frac{4\alpha^2 \rho^2 \langle v_1, v_2 \rangle}{\sigma^2 + s\rho^2}\right) \vee \cosh\left(\frac{4\rho^2 \langle v_1, v_2 \rangle}{\sigma^2 + s\rho^2}\right) \right]^n. \quad (\text{B.6})$$

569 The following lemma shows that the right-hand side of (B.6) is of order  $1 + o(1)$ .

570 **Lemma B.3** ([62]). For

$$\gamma_n = o\left(\sqrt{\frac{s \log d}{n}} \wedge \frac{1}{\alpha^2} \cdot \frac{s \log d}{n}\right),$$

571 if  $s = o(d^{1/2-\delta})$  for some absolute constant  $\delta > 0$ , it then holds that

$$\frac{1}{|\mathcal{G}(s)|^2} \sum_{v_1, v_2 \in \mathcal{G}(s)} \left[ \exp\left(\frac{4\alpha^2 \rho^2 \langle v_1, v_2 \rangle}{\sigma^2 + s\rho^2}\right) \vee \cosh\left(\frac{4\rho^2 \langle v_1, v_2 \rangle}{\sigma^2 + s\rho^2}\right) \right]^n = 1 + o(1). \quad (\text{B.7})$$

572 *Proof.* See §C.2 for a detailed proof.  $\square$

573 Combining Lemma B.3 and (B.6), we conclude that for  $\gamma_n = o(\sqrt{s \log d/n} \wedge 1/\alpha^2 \cdot s \log d/n)$ , it holds that  $(\mathbb{E}_{\mathbb{P}_0^n}[\mathrm{d}\bar{\mathbb{P}}/\mathrm{d}\mathbb{P}_0^n])^2 - 1 = o(1)$ . Then following from (B.2), we have  
574  $\liminf_{n \rightarrow \infty} R_n^*(\mathcal{G}_0, \mathcal{G}_1) \geq 1$ , which concludes the proof of Proposition 3.1.  $\square$

## 576 B.2 Proof of Theorem 3.2

577 *Proof.* It follows from Definition 2.2 that for  $\gamma_n = o(\gamma_n^*)$ , any hypothesis testing problem in  
578 (2.7) is asymptotically powerless. It remains to show that for  $\gamma_n = o(\sqrt{s^2/n} \wedge 1/\alpha^2 \cdot s/n)$ , any  
579 computationally tractable test is asymptotically powerless. First, we restrict the original estimation  
580 problem to the following hypothesis testing problem,

$$H_0: Y = \epsilon \text{ versus } H_1: Y = \begin{cases} X^\top \beta^* + \epsilon, & \text{with probability } \alpha \\ \eta \cdot X^\top \beta^* + \epsilon, & \text{with probability } 1 - \alpha \end{cases}. \quad (\text{B.8})$$

581 In (B.8), we restrict  $\beta^*$  to the set  $\beta^* \in \{\rho \cdot v : v \in \mathcal{G}(s)\}$  with  $\mathcal{G}(s) = \{v \in \{0, 1\}^d : \|v\|_0 = s\}$ .  
582 We set  $\epsilon \sim N(0, \sigma^2 + s\rho^2)$  under  $H_0$  and  $\epsilon \sim N(0, \sigma^2)$  under  $H_1$  so that straightforward tests based  
583 on mean and variance are not able to detect the existence of a nonzero parameter  $\beta^*$ .

584 By restricting the parameter space, we obtain a lower bound for the minimax risk. Recall that we  
585 denote by  $\bar{\mathbb{P}}_0$  and  $\bar{\mathbb{P}}_v$  the distributions of  $Z_q$ , which denotes the response of the oracle to the query  $q$   
586 when the true distributions of the data are  $\mathbb{P}_0$  and  $\mathbb{P}_v$ , correspondingly. We have

$$\bar{R}_n^*[\mathcal{G}_0, \mathcal{G}_1; \mathcal{A}, r] \geq \inf_{\phi \in \mathcal{H}(\mathcal{A}, r)} \left\{ \bar{\mathbb{P}}_0(\phi = 1) + \sup_{v \in \mathcal{G}(s)} \bar{\mathbb{P}}_v(\phi = 0) \right\}. \quad (\text{B.9})$$

587 To show that any computationally tractable test is asymptotically powerless, it suffices to show that  
588 the right-hand side of (B.9) is asymptotically lower bounded by one. By Theorem 4.2 of [53], we  
589 know that this holds true if

$$T \cdot \sup_{q \in \mathcal{Q}} |\mathcal{C}(q)|/|\mathcal{G}(s)| = o(1),$$

590 where  $\mathcal{C}(q)$  is defined as

$$\mathcal{C}(q) = \{v \in \mathcal{G}(s) : |\mathbb{E}_{\mathbb{P}_v}[q(Z)] - \mathbb{E}_{\mathbb{P}_0}[q(Z)]| > \tau_q\}.$$

591 Here  $\tau_q$  is the tolerance parameter defined in Definition 2.3, with  $(Y, X)$  following  $\mathbb{P}_v$ . The following  
592 lemma shows that  $T \cdot \sup_{q \in \mathcal{Q}} |\mathcal{C}(q)|/|\mathcal{G}(s)| = o(1)$  if  $\gamma_n$  is sufficiently small.

593 **Lemma B.4** ([53]). For  $s = o(d^{1/2-\delta})$ ,  $T = O(d^\mu)$ , and

$$\gamma_n = o\left(\frac{s^2}{n} \wedge \frac{1}{\alpha^2} \cdot \frac{s}{n}\right),$$

594 it holds that

$$T \cdot \sup_{q \in \mathcal{Q}} |\mathcal{C}(q)|/|\mathcal{G}(s)| = o(1). \quad (\text{B.10})$$

595 *Proof.* See §C.3 for a detailed proof.  $\square$

596 By combining Theorem 4.2 of [53] and Lemma B.4, we conclude that the right-hand side of (B.9)  
597 is asymptotically lower bounded by one. Therefore, it holds that  $\liminf_{n \rightarrow \infty} \bar{R}_n^*[\mathcal{G}_0, \mathcal{G}_1; \mathcal{A}, r] \geq 1$ ,  
598 which concludes the proof of Theorem 3.2.  $\square$

### 599 B.3 Proof of Theorem A.2

600 *Proof.* Recall that we denote by  $Z = (Y, X)$  and  $\mathbb{P}_0, \mathbb{P}_{v^*}$  the distributions of  $Z$  under the null and  
601 alternative hypotheses with  $\beta^* = \rho \cdot v^*$ , respectively. For the hypothesis testing problem in (A.1),  
602 the following lemma characterizes the expectations of the query functions defined in (A.5).

603 **Lemma B.5.** For any  $v, v^* \in \bar{\mathcal{G}}(s)$  and

$$\gamma_n = \Omega\left((\log n)^{1+1/\nu} \cdot \sqrt{\frac{s \log d}{n}} \wedge \frac{(\log n)^{1+2/\nu}}{\alpha^2} \cdot \frac{s \log d}{n}\right),$$

604 it holds that

$$\mathbb{E}_{\mathbb{P}_0}[q_{1,v}(Y, X)] \leq 1/n, \quad \mathbb{E}_{\mathbb{P}_0}[q_{2,v}(Y, X)] \leq 1/n. \quad (\text{B.11})$$

605 In addition, it holds that

$$\begin{aligned} \mathbb{E}_{\mathbb{P}_{v^*}}[q_{1,v^*}(Y, X)] &\geq s\rho^2/2 \text{ if } \gamma_n = \Omega\left((\log n)^{1+1/\nu} \cdot \sqrt{\frac{s \log d}{n}}\right), \\ \mathbb{E}_{\mathbb{P}_{v^*}}[q_{2,v^*}(Y, X)] &\geq \sqrt{\alpha^2 s \rho^2}/2 \text{ if } \gamma_n = \Omega\left(\frac{(\log n)^{1+2/\nu}}{\alpha^2} \cdot \frac{s \log d}{n}\right). \end{aligned} \quad (\text{B.12})$$

606 *Proof.* See §C.4 for a detailed proof.  $\square$

607 In what follows, we establish an upper bound of the risk of  $\phi = \phi_1 \vee \phi_2$ . Recall that we define the  
608 test functions  $\phi_1$  and  $\phi_2$  in (A.6) with parameters

$$\tau_1 = CR^{2+1/\nu} \cdot (\log n)^{1+1/\nu} \cdot \sqrt{\frac{s \log d}{n}}, \quad \tau_2 = C'R^{1+1/\nu} \cdot (\log n)^{1/2+1/\nu} \cdot \sqrt{\frac{s \log d}{n}}. \quad (\text{B.13})$$

609 where  $C$  and  $C'$  are absolute constants. Note that the total number of query functions  $\{q_{1,v}\}_{v \in \mathcal{G}(s)}$   
610 and  $\{q_{2,v}\}_{v \in \mathcal{G}(s)}$  is  $|\mathcal{Q}_\phi| = 2 \cdot \binom{d}{s} \cdot 2^s$ . Therefore, following from (2.12) with  $\xi = 1/d$ , for sufficiently  
611 large  $d$  and  $n$ , it holds that

$$\tau_{q_{1,v}} \leq C_0 R^{2+1/\nu} (\log n)^{1/2+1/\nu} \cdot \sqrt{\frac{s \log d}{n}}, \quad \tau_{q_{2,v}} \leq C_1 R^{1+1/\nu} (\log n)^{1/2+1/\nu} \cdot \sqrt{\frac{s \log d}{n}}, \quad (\text{B.14})$$

612 where  $\tau_{q_{1,v}}$  and  $\tau_{q_{2,v}}$  are the tolerance parameters of  $q_{1,v}$  and  $q_{2,v}$  defined in Definition 2.3, and  
613  $C_0, C_1$  are positive absolute constants. We fix  $C$  and  $C'$  in (B.13) such that  $\tau_1 \geq \tau_{q_{1,v}} + 1/n$  and  
614  $\tau_2 \geq \tau_{q_{2,v}} + 1/n$ . Recall that we denote by  $\bar{Z}_{1,v}$  and  $\bar{Z}_{2,v}$  the responses of the statistical oracle to  
615 the query functions  $q_{1,v}$  and  $q_{2,v}$ . Further recall that we denote by  $\mathbb{P}_0$  and  $\mathbb{P}_{v^*}$  the distributions of  
616 response of the statistical oracle to the query functions when the true distribution of the data is  $\mathbb{P}_0$   
617 and  $\mathbb{P}_{v^*}$ . Following from Lemma B.5, it holds for any  $v \in \mathcal{G}(s)$  and  $i \in \{1, 2\}$  that

$$\mathbb{P}_0(\bar{Z}_{i,v} \geq \tau_i) \leq \mathbb{P}_0(|\bar{Z}_{i,v} - \mathbb{E}_{\mathbb{P}_0}[q_{i,v}(Y, X)]| \geq \tau_{q_{i,v}}).$$

618 Based on (2.11) with  $\xi = 1/d$ , it holds for  $i \in \{1, 2\}$  that

$$\begin{aligned} \bar{\mathbb{P}}_0(\phi_i = 1) &= \bar{\mathbb{P}}_0\left(\sup_{v \in \mathcal{G}(s)} \bar{Z}_{i,v} > \tau_i\right) \\ &\leq \bar{\mathbb{P}}_0\left(\bigcup_{v \in \mathcal{G}(s)} \left\{|\bar{Z}_{i,v} - \mathbb{E}_{\mathbb{P}_0}[q_{i,v}(Y, X)]| > \tau_{q_{i,v}}\right\}\right) \leq 2/d. \end{aligned} \quad (\text{B.15})$$

619 Recall that we define  $\phi = \phi_1 \vee \phi_2$ . Therefore, we obtain from (B.15) that

$$\bar{\mathbb{P}}_0(\phi = 1) \leq \bar{\mathbb{P}}_0(\phi_1 = 1) + \bar{\mathbb{P}}_0(\phi_2 = 1) = 4/d. \quad (\text{B.16})$$

620 In other words, the type-I error of  $\phi$  is upper bounded by  $4/d$ . It remains to upper bound the type-II  
 621 error of  $\phi$ . Following from the lower bound of SNR in (A.8), it holds that either  $s\rho^2/4 \geq \tau_1$  or  
 622  $\sqrt{\alpha^2 s\rho^2}/4 \geq \tau_2$  for a sufficiently large  $n$ . Following from Lemma B.5, if  $s\rho^2/4 \geq \tau_1$ , it holds that

$$\begin{aligned} \bar{\mathbb{P}}_{v^*}(\bar{Z}_{1,v^*} \leq \tau_1) &\leq \bar{\mathbb{P}}_{v^*}(\bar{Z}_{1,v^*} \leq \mathbb{E}_{\mathbb{P}_{v^*}}[q_{1,v^*}(Y, X)] - \tau_1) \\ &\leq \bar{\mathbb{P}}_{v^*}\left(|\bar{Z}_{1,v^*} - \mathbb{E}_{\mathbb{P}_{v^*}}[q_{1,v^*}(Y, X)]| \geq \tau_{q_{1,v^*}}\right), \end{aligned} \quad (\text{B.17})$$

623 where the last inequality holds since  $\tau_1 > \tau_{q_{1,v^*}}$ . Therefore, it follows from (2.11) with  $\xi = 1/d$  that

$$\begin{aligned} \bar{\mathbb{P}}_{v^*}(\phi_1 = 0) &= \bar{\mathbb{P}}_{v^*}\left(\sup_{v \in \mathcal{G}(s)} \bar{Z}_{1,v} < \tau_1\right) \leq \bar{\mathbb{P}}_{v^*}(\bar{Z}_{1,v^*} < \tau_1) \\ &\leq \bar{\mathbb{P}}_{v^*}\left(|\bar{Z}_{1,v^*} - \mathbb{E}_{\mathbb{P}_{v^*}}[q_{1,v^*}(Y, X)]| > \tau_{q_{1,v^*}}\right) \leq 2/d. \end{aligned} \quad (\text{B.18})$$

624 Similarly, following from Lemma B.5, if  $\sqrt{\alpha^2 s\rho^2}/4 \geq \tau_2$ , it holds that,

$$\begin{aligned} \bar{\mathbb{P}}_{v^*}(\phi_2 = 0) &= \bar{\mathbb{P}}_{v^*}\left(\sup_{v \in \mathcal{G}(s)} \bar{Z}_{2,v} < \tau_2\right) \leq \bar{\mathbb{P}}_{v^*}(\bar{Z}_{2,v^*} < \tau_2) \\ &\leq \bar{\mathbb{P}}_{v^*}\left(|\bar{Z}_{2,v^*} - \mathbb{E}_{\mathbb{P}_{v^*}}[q_{2,v^*}(Y, X)]| > \tau_{q_{2,v^*}}\right) \leq 2/d, \end{aligned} \quad (\text{B.19})$$

625 where the last inequality holds since  $\tau_2 > \tau_{q_{2,v^*}}$ . Note that (B.18) and (B.19) holds for any  $(\beta^*, \sigma) \in$   
 626  $\bar{\mathcal{G}}_1(s, \gamma_n)$  if (A.8) holds. Therefore, by combining (B.18) and (B.19), we have

$$\sup_{(\beta^*, \sigma) \in \bar{\mathcal{G}}_1(s, \gamma_n)} \bar{\mathbb{P}}_{v^*}(\phi = 0) \leq \sup_{(\beta^*, \sigma) \in \bar{\mathcal{G}}_1(s, \gamma_n)} \{\bar{\mathbb{P}}_{v^*}(\phi_1 = 0) \wedge \bar{\mathbb{P}}_{v^*}(\phi_2 = 0)\} \leq 2/d. \quad (\text{B.20})$$

627 In other words, the type-II error of  $\phi$  is upper bounded by  $2/d$ . By combining (B.16) and (B.20), we  
 628 conclude that if (A.8) holds, the risk for  $\phi$  is of order  $O(1/d)$ , which completes the proof of Theorem  
 629 A.2.  $\square$

#### 630 B.4 Proof of Theorem A.3

631 *Proof.* The proof is similar to that of Theorem A.2 in §B.3. Recall that we denote by  $Z = (Y, X)$  and  
 632  $\mathbb{P}_0, \mathbb{P}_{v^*}$  the distributions of  $Z$  under the null and alternative hypotheses with  $\beta^* = \rho \cdot v^*$ , respectively.  
 633 The following lemma characterizes the expectations of the query functions defined in (A.11).

634 **Lemma B.6.** For any  $v^* \in \bar{\mathcal{G}}(s)$  and

$$\gamma_n = \Omega\left((\log n)^{1+1/\nu} \cdot \sqrt{\frac{s^2 \log d}{n}} \bigwedge \frac{(\log n)^{1+2/\nu}}{\alpha^2} \cdot \frac{s \log d}{n}\right),$$

635 it holds that

$$\sup_{j \in [d]} \mathbb{E}_{\mathbb{P}_0}[q_{1,j}(Y, X)] \leq 1/n, \quad \sup_{j \in [d]} \mathbb{E}_{\mathbb{P}_0}[q_{2,j}(Y, X)] \leq 1/n. \quad (\text{B.21})$$

636 In addition, it holds that

$$\begin{aligned} \sup_{j \in [d]} \mathbb{E}_{\mathbb{P}_{v^*}}[q_{1,j}(Y, X)] &\geq \rho^2/2 \text{ if } \gamma_n = \Omega\left((\log n)^{1+1/\nu} \cdot \sqrt{\frac{s^2 \log d}{n}}\right), \\ \sup_{j \in [d]} |\mathbb{E}_{\mathbb{P}_{v^*}}[q_{2,j}(Y, X)]| &\geq \alpha\rho/2 \text{ if } \gamma_n = \Omega\left(\frac{(\log n)^{1+2/\nu}}{\alpha^2} \cdot \frac{s \log d}{n}\right). \end{aligned} \quad (\text{B.22})$$

637 *Proof.* See §C.5 for a detailed proof.  $\square$

638 In what follows, we upper bound the risk of the test function  $\tilde{\phi} = \tilde{\phi}_1 \vee \tilde{\phi}_2$ . Recall that we define the  
 639 test functions  $\tilde{\phi}_1$  and  $\tilde{\phi}_2$  in (A.11) with parameters

$$\tilde{\tau}_1 = CR^{2+1/\nu} \cdot (\log n)^{1+1/\nu} \cdot \sqrt{\frac{\log d}{n}}, \quad \tilde{\tau}_2 = C'R^{1+1/\nu} \cdot (\log n)^{1/2+1/\nu} \cdot \sqrt{\frac{\log d}{n}}, \quad (\text{B.23})$$

640 where  $C, C'$  are absolute constants. Note that the total number of query functions  $\{q_{1,j}\}_{j \in [d]}$  and  
 641  $\{q_{2,j}\}_{j \in [d]}$  is  $|\mathcal{Q}_{\tilde{\phi}}| = 2d$ . Therefore, following from Definition 2.3 with  $\xi = 1/d$ , for sufficiently

large  $d$  and  $n$ , the tolerance parameters of  $q_{1,j}$  and  $q_{2,j}$  are upper bounded as follows,

$$\tau_{q_{1,j}} \leq C'_0 R^{2+1/\nu} (\log n)^{1/2+1/\nu} \cdot \sqrt{\frac{\log d}{n}}, \quad \tau_{q_{2,j}} \leq C'_1 R^{1+1/\nu} (\log n)^{1/2+1/\nu} \cdot \sqrt{\frac{\log d}{n}}, \quad (\text{B.24})$$

where  $C'_0$  and  $C'_1$  are positive absolute constants. We fix  $C$  and  $C'$  in (B.13) such that  $\tilde{\tau}_1 \geq \tau_{q_{1,j}} + 1/n$  and  $\tilde{\tau}_2 \geq \tau_{q_{2,j}} + 1/n$ . Recall that we denote by  $\bar{Z}_{1,j}$  and  $\bar{Z}_{2,j}$  the responses of the statistical oracle to the query functions  $q_{1,j}$  and  $q_{2,j}$ , respectively. Further recall that we denote by  $\bar{\mathbb{P}}_0$  and  $\bar{\mathbb{P}}_{v^*}$  the distributions of response of the statistical oracle to the query functions when the true distribution of the data is  $\mathbb{P}_0$  and  $\mathbb{P}_{v^*}$ . Following from Lemma B.6, for any  $j \in [d]$  and  $i \in \{1, 2\}$ , it holds that

$$\bar{\mathbb{P}}_0(\bar{Z}_{i,j} \geq \tilde{\tau}_1) \leq \bar{\mathbb{P}}_0(|\bar{Z}_{i,j} - \mathbb{E}_{\mathbb{P}_0}[q_{i,j}(Y, X)]| \geq \tau_{q_{i,j}}).$$

Based on (2.11) with  $\xi = 1/d$ , it holds for  $i \in \{1, 2\}$  that

$$\begin{aligned} \bar{\mathbb{P}}_0(\tilde{\phi}_i = 1) &= \bar{\mathbb{P}}_0\left(\sup_{j \in [d]} \bar{Z}_{i,j} > \tilde{\tau}_i\right) \\ &\leq \bar{\mathbb{P}}_0\left(\bigcup_{j \in [d]} \left\{|\bar{Z}_{i,j} - \mathbb{E}_{\mathbb{P}_0}[q_{i,j}(Y, X)]| > \tau_{q_{i,j}}\right\}\right) \leq 2/d, \end{aligned} \quad (\text{B.25})$$

Recall that we define  $\tilde{\phi} = \tilde{\phi}_1 \vee \tilde{\phi}_2$ . Therefore, we obtain from (B.25) that

$$\bar{\mathbb{P}}_0(\tilde{\phi} = 1) \leq \bar{\mathbb{P}}_0(\tilde{\phi}_1 = 1) + \bar{\mathbb{P}}_0(\tilde{\phi}_2 = 1) = 4/d. \quad (\text{B.26})$$

In other words, the type-I error of  $\tilde{\phi}$  is upper bounded by  $4/d$ . It remains to upper bound the type-II error of  $\phi$ . Following from the lower bound on SNR in (A.14), it holds that either  $\rho^2/4 \geq \tilde{\tau}_1$  or  $\alpha\rho/4 \geq \tilde{\tau}_2$  with a sufficiently large  $n$ . For any  $v^* \in \bar{\mathcal{G}}(s)$ , let  $j^* = \arg\max_{j \in [d]} \mathbb{E}_{\mathbb{P}_{v^*}}[q_{1,j}(Y, X)]$ . Following from Lemma B.5, if  $\rho^2/4 \geq \tilde{\tau}_1$ , it holds that

$$\begin{aligned} \bar{\mathbb{P}}_{v^*}(\bar{Z}_{1,j^*} \leq \tilde{\tau}_1) &\leq \bar{\mathbb{P}}_{v^*}(\bar{Z}_{1,j^*} \leq \mathbb{E}_{\mathbb{P}_{v^*}}[q_{1,j^*}(Y, X)] - \tilde{\tau}_1) \\ &\leq \bar{\mathbb{P}}_{v^*}(|\bar{Z}_{1,j^*} - \mathbb{E}_{\mathbb{P}_{v^*}}[q_{1,j^*}(Y, X)]| \geq \tau_{q_{1,j^*}}), \end{aligned} \quad (\text{B.27})$$

where the last inequality holds since  $\tilde{\tau}_1 > \tau_{q_{1,j^*}}$ . Therefore, we conclude from (2.11) with  $\xi = 1/d$  that

$$\begin{aligned} \bar{\mathbb{P}}_{v^*}(\tilde{\phi}_1 = 0) &= \bar{\mathbb{P}}_{v^*}\left(\sup_{j \in [d]} \bar{Z}_{1,j} < \tilde{\tau}_1\right) \leq \bar{\mathbb{P}}_{v^*}(\bar{Z}_{1,j^*} < \tilde{\tau}_1) \\ &\leq \bar{\mathbb{P}}_{v^*}(|\bar{Z}_{1,j^*} - \mathbb{E}_{\mathbb{P}_{v^*}}[q_{1,j^*}(Y, X)]| > \tau_{q_{1,j^*}}) \leq 2/d. \end{aligned} \quad (\text{B.28})$$

Similarly, for any  $v^* \in \bar{\mathcal{G}}(s)$ , let  $k^* = \arg\max_{j \in [d]} \mathbb{E}_{\mathbb{P}_{v^*}}[q_{2,j}(Y, X)]$  and  $\ell^* = \arg\min_{j \in [d]} \mathbb{E}_{\mathbb{P}_{v^*}}[q_{2,j}(Y, X)]$ . Following from Lemma B.5, if  $\alpha\rho/4 \geq \tilde{\tau}_2$ , it holds that either  $\mathbb{E}[q_{2,k^*}(Y, X)] \geq \alpha\rho/2$  or  $\mathbb{E}[q_{2,\ell^*}(Y, X)] \leq -\alpha\rho/2$ . If it holds that  $\mathbb{E}_{\mathbb{P}_{v^*}}[q_{2,k^*}(Y, X)] \geq \alpha\rho/2 \geq 2\tilde{\tau}_2$ , we have

$$\begin{aligned} \bar{\mathbb{P}}_{v^*}(\tilde{\phi}_2 = 0) &\leq \bar{\mathbb{P}}_{v^*}\left(\sup_{j \in [d]} \bar{Z}_{2,j} < \tilde{\tau}_2\right) \leq \bar{\mathbb{P}}_{v^*}(\bar{Z}_{2,k^*} < \tilde{\tau}_2) \\ &\leq \bar{\mathbb{P}}_{v^*}(|\bar{Z}_{2,k^*} - \mathbb{E}_{\mathbb{P}_{v^*}}[q_{2,k^*}(Y, X)]| > \tau_{q_{2,k^*}}) \leq 2/d, \end{aligned} \quad (\text{B.29})$$

where the last inequality holds since  $\tilde{\tau}_2 > \tau_{q_{2,k^*}}$ . If it holds that  $\mathbb{E}_{\mathbb{P}_{v^*}}[q_{2,\ell^*}(Y, X)] \leq -\alpha\rho/2 \leq -2\tilde{\tau}_2$ , we have

$$\begin{aligned} \bar{\mathbb{P}}_{v^*}(\tilde{\phi}_2 = 0) &\leq \bar{\mathbb{P}}_{v^*}\left(\inf_{j \in [d]} \bar{Z}_{2,j} > -\tilde{\tau}_2\right) \leq \bar{\mathbb{P}}_{v^*}(\bar{Z}_{2,\ell^*} > -\tilde{\tau}_2) \\ &\leq \bar{\mathbb{P}}_{v^*}(|\bar{Z}_{2,\ell^*} - \mathbb{E}_{\mathbb{P}_{v^*}}[q_{2,\ell^*}(Y, X)]| > \tau_{q_{2,\ell^*}}) \leq 2/d, \end{aligned} \quad (\text{B.30})$$

where the last inequality holds since  $\tilde{\tau}_2 > \tau_{q_{2,\ell^*}}$ . Note that (B.28), (B.29), and (B.30) holds for any  $(\beta^*, \sigma) \in \bar{\mathcal{G}}_1(s, \gamma_n)$  if (A.14) holds. Therefore, by combining (B.28), (B.29), and (B.30), we have

$$\sup_{(\beta^*, \sigma) \in \bar{\mathcal{G}}_1(s, \gamma_n)} \bar{\mathbb{P}}_{v^*}(\tilde{\phi} = 0) \leq \sup_{(\beta^*, \sigma) \in \bar{\mathcal{G}}_1(s, \gamma_n)} \{\bar{\mathbb{P}}_{v^*}(\tilde{\phi}_1 = 0) \wedge \bar{\mathbb{P}}_{v^*}(\tilde{\phi}_2 = 0)\} \leq 2/d. \quad (\text{B.31})$$

664 In other words, the type-II error of  $\phi$  is upper bounded by  $2/d$ . By combining (B.26) and (B.31),  
 665 we conclude that if (A.14) holds, the risk for  $\tilde{\phi}$  is of order  $O(1/d)$ , which completes the proof of  
 666 Theorem A.3.  $\square$

### 667 B.5 Proof of Theorem 3.3

668 *Proof.* We prove by contradiction in the following. We assume that there exist an absolute constant  
 669  $\eta$  and an algorithm  $\mathcal{A} \in \mathcal{A}(T)$  with  $T = O(d^\eta)$  that estimates  $\beta^*$  in (2.6), such that for any given  
 670 oracle  $r \in \mathcal{R}[\xi, n, T, \eta(\mathcal{Q})]$ , it holds that

$$\bar{\mathbb{P}}(\|\hat{\beta} - \beta^*\|_2^2/\sigma^2 \geq \gamma_n/16) = o(1), \quad (\text{B.32})$$

671 where  $\hat{\beta}$  is the estimator of  $\beta^*$ . In other words, it holds that  $\|\hat{\beta} - \beta^*\|_2^2/\sigma^2 \leq \gamma_n/16$  with probability  
 672  $1 - o(1)$ . Recall that we set  $\|\beta^*\|_2^2/\sigma^2 = \gamma_n$ . Based on (B.32), it holds with probability  $1 - o(1)$  that

$$\|\hat{\beta} + \beta^*\|_2^2 \leq (\|\hat{\beta} - \beta^*\|_2 + 2\|\beta^*\|_2)^2 \leq 2\|\hat{\beta} - \beta^*\|_2^2 + 8\|\beta^*\|_2^2 \leq (1/8 + 8) \cdot \sigma^2 \gamma_n. \quad (\text{B.33})$$

673 Combining (B.32) and (B.33), it follows from the Cauchy-Schwartz inequality that

$$\|\hat{\beta}\|_2^2 - \|\beta^*\|_2^2 = |(\hat{\beta} - \beta^*)^\top (\hat{\beta} + \beta^*)| \leq \|\hat{\beta} - \beta^*\|_2 \cdot \|\hat{\beta} + \beta^*\|_2 \leq 5/8 \cdot \sigma^4 \gamma_n^2, \quad (\text{B.34})$$

674 which holds with probability  $1 - o(1)$ . In what follows, we construct an asymptotically powerful  
 675 test with  $T = O(d^\eta)$  query complexity for the hypothesis testing problem in (2.7). We set  $\phi =$   
 676  $\mathbb{1}\{\|\hat{\beta}\|_2^2 \geq \gamma_n/5\}$ , where  $\hat{\beta}$  is the estimator of  $\beta^*$  given the algorithm  $\mathcal{A}$ . Following from (B.32),  
 677 it holds with probability  $1 - o(1)$  that  $\|\hat{\beta}\|_2^2/\sigma^2 \leq \gamma_n/16$  under the null hypothesis with  $\beta^* = 0$ .  
 678 Meanwhile, following from (B.34), it holds with probability  $1 - o(1)$  that  $\|\hat{\beta}\|_2^2/\sigma^2 \geq \gamma_n/5$  under  
 679 the alternative hypothesis with  $\beta^* \neq 0$  and  $\|\beta^*\|_2^2/\sigma^2 = \gamma_n$ . In other words,  $\phi$  is asymptotically  
 680 powerful and computationally tractable with  $\gamma_n = o(\sqrt{s^2/n} \wedge 1/\alpha^2 \cdot s \log d/n)$ , which contradicts  
 681 the computational minimax separation rate in (A.16).  $\square$

## 682 C Proof of Lemmas

683 In this section, we lay out the proof of the lemmas in §B.

### 684 C.1 Proof of Lemma B.1

685 *Proof.* It follows from the model in (B.1) that under the alternative hypothesis,

$$\begin{aligned} Z = (Y, X) &\sim \alpha \cdot N(0, \Sigma(v)) + \frac{1-\alpha}{2} \cdot N(0, \Sigma(v)) + \frac{1-\alpha}{2} \cdot N(0, \Sigma(-v)), \\ &\sim \frac{1+\alpha}{2} \cdot N(0, \Sigma(v)) + \frac{1-\alpha}{2} \cdot N(0, \Sigma(-v)), \end{aligned}$$

686 where  $\Sigma(v)$  is the covariance matrix

$$\Sigma(v) = \begin{bmatrix} \sigma^2 + s\rho^2 & \rho v^\top \\ \rho v & I_d \end{bmatrix} \in \mathbb{R}^{(d+1) \times (d+1)}. \quad (\text{C.1})$$

687 Meanwhile, we have  $Z = (Y, X) \sim N(0, \Sigma_0)$  under the null hypothesis, where we denote by  
 688  $\Sigma_0 = \Sigma(0)$ . Recall that we denote by  $\mathbb{P}_v$  and  $\mathbb{P}_0$  the distributions of  $Z$  under the alternative and null  
 689 hypotheses, respectively. Therefore, it holds that

$$\begin{aligned} \frac{d\mathbb{P}_v}{d\mathbb{P}_0}(Z) &= \frac{1+\alpha}{2} \cdot \sqrt{\frac{\det(\Sigma_0)}{\det(\Sigma(v))}} \cdot \exp\left(-\frac{Z(\Sigma^{-1}(v) - \Sigma_0^{-1})Z^\top}{2}\right) \\ &\quad + \frac{1-\alpha}{2} \cdot \sqrt{\frac{\det(\Sigma_0)}{\det(\Sigma(-v))}} \cdot \exp\left(-\frac{Z(\Sigma^{-1}(-v) - \Sigma_0^{-1})Z^\top}{2}\right), \end{aligned} \quad (\text{C.2})$$

690 where we denote by  $\Sigma^{-1}(v)$  the inverse matrix of  $\Sigma(v)$ . We denote by  $\xi$  the Bernoulli random  
 691 variable with distribution

$$\mathbb{P}(\xi = 1) = \frac{1+\alpha}{2}, \quad \mathbb{P}(\xi = -1) = \frac{1-\alpha}{2}. \quad (\text{C.3})$$

Therefore, it follows from (C.2) that

$$\frac{d\mathbb{P}_v}{d\mathbb{P}_0}(Z) = \mathbb{E}_\xi \left[ \sqrt{\frac{\det(\Sigma_0)}{\det(\Sigma(\xi v))}} \cdot \exp\left(-\frac{Z(\Sigma^{-1}(\xi v) - \Sigma_0^{-1})Z^\top}{2}\right) \right]. \quad (\text{C.4})$$

Following from (C.4), for  $v_1$  and  $v_2$  in  $\mathcal{G}(s)$ , we have

$$\begin{aligned} \mathbb{E}_{\mathbb{P}_0} \left[ \frac{d\mathbb{P}_{v_1}}{d\mathbb{P}_0} \frac{d\mathbb{P}_{v_2}}{d\mathbb{P}_0}(Z) \right] &= \mathbb{E}_{\mathbb{P}_0} \mathbb{E}_{\xi_1, \xi_2} \left[ \frac{\det(\Sigma_0)}{\sqrt{\det(\Sigma(\xi_1 v_1)) \cdot \det(\Sigma(\xi_2 v_2))}} \right. \\ &\quad \left. \cdot \exp\left(-1/2 \cdot Z^\top (\Sigma^{-1}(\xi_1 v_1) + \Sigma^{-1}(\xi_2 v_2) - 2\Sigma_0^{-1})Z\right) \right], \end{aligned} \quad (\text{C.5})$$

where  $\xi_1$  and  $\xi_2$  are independent copies of  $\xi$  defined in (C.3). In what follows, we calculate the right-hand side of (C.5) by invoking Fubini's theorem. We first calculate the right-hand side of (C.5) by integrating under  $\mathbb{P}_0$  and obtain that

$$\begin{aligned} \mathbb{E}_{\mathbb{P}_0} \left[ \exp\left(-1/2 \cdot Z^\top (\Sigma^{-1}(\xi_1 v_1) + \Sigma^{-1}(\xi_2 v_2) - 2\Sigma_0^{-1})Z\right) \right] \\ = \frac{1}{\sqrt{(2\pi)^{d+1} \cdot \det(\Sigma_0)}} \cdot \int_{z \in \mathbb{R}^{d+1}} \exp\left(-1/2 \cdot z^\top (\Sigma^{-1}(\xi_1 v_1) + \Sigma^{-1}(\xi_2 v_2) - \Sigma_0^{-1})z\right) d\mathbb{P}_0(z) \\ = \left( \det(\Sigma^{-1}(\xi_1 v_1) + \Sigma^{-1}(\xi_2 v_2) - \Sigma_0^{-1}) \cdot \det(\Sigma_0) \right)^{-1/2}. \end{aligned} \quad (\text{C.6})$$

By plugging (C.6) into (C.5), we obtain

$$\begin{aligned} \mathbb{E}_{\xi_1, \xi_2} \mathbb{E}_{\mathbb{P}_0} \left[ \frac{\det(\Sigma_0)}{\sqrt{\det(\Sigma(\xi_1 v_1)) \cdot \det(\Sigma(\xi_2 v_2))}} \cdot \exp\left(-1/2 \cdot Z^\top (\Sigma^{-1}(\xi_1 v_1) + \Sigma^{-1}(\xi_2 v_2) - 2\Sigma_0^{-1})Z\right) \right] \\ = \mathbb{E}_{\xi_1, \xi_2} \left[ \frac{\det(\Sigma_0)}{\sqrt{\det(\Sigma(\xi_1 v_1)) \cdot \det(\Sigma(\xi_2 v_2))}} \cdot \left( \det(\Sigma^{-1}(\xi_1 v_1) + \Sigma^{-1}(\xi_2 v_2) - \Sigma_0^{-1}) \det(\Sigma_0) \right)^{-1/2} \right] \\ = \sqrt{\det(\Sigma_0)} \cdot \mathbb{E}_{\xi_1, \xi_2} \left[ \det(\Sigma(\xi_1 v_1) + \Sigma(\xi_2 v_2) - \Sigma(\xi_1 v_1)\Sigma_0^{-1}\Sigma(\xi_2 v_2))^{-1/2} \right]. \end{aligned} \quad (\text{C.7})$$

Meanwhile, by (C.1) it holds that  $\det(\Sigma_0) = \sigma^2 + s\rho^2$  and

$$\begin{aligned} \Sigma(\xi_1 v_1) + \Sigma(\xi_2 v_2) - \Sigma(\xi_1 v_1) \cdot \Sigma_0^{-1} \cdot \Sigma(\xi_2 v_2) \\ = \begin{bmatrix} \sigma^2 + s\rho^2(1 - \xi_1 \xi_2 \cdot v_1^\top v_2) & 0 \\ 0 & I_d - (\rho^2 \xi_1 \xi_2)/(\sigma^2 + s\rho^2) \cdot v_1 v_2^\top \end{bmatrix}. \end{aligned} \quad (\text{C.8})$$

Therefore, we are able to calculate the right-hand side of (C.7) explicitly. Combining (C.5) and (C.7) and apply Fubini's theorem, we obtain that

$$\mathbb{E}_{\mathbb{P}_0} \left[ \frac{d\mathbb{P}_{v_1}}{d\mathbb{P}_0} \frac{d\mathbb{P}_{v_2}}{d\mathbb{P}_0}(Z) \right] = \mathbb{E}_{\xi_1, \xi_2} \left[ 1 - \frac{\rho^2 \xi_1 \xi_2}{\sigma^2 + s\rho^2} \cdot \langle v_1, v_2 \rangle \right]. \quad (\text{C.9})$$

Recall that  $\xi_1$  and  $\xi_2$  are independent copies of  $\xi$  defined in (C.3), it then holds that

$$\mathbb{E}_{\mathbb{P}_0} \left[ \frac{d\mathbb{P}_{v_1}}{d\mathbb{P}_0} \frac{d\mathbb{P}_{v_2}}{d\mathbb{P}_0}(Z) \right] = \frac{1 + \alpha^2(\sigma^2 + s\rho^2)^{-1}\rho^2 \cdot \langle v_1, v_2 \rangle}{1 - (\sigma^2 + s\rho^2)^{-2}\rho^4 \cdot \langle v_1, v_2 \rangle^2}. \quad (\text{C.10})$$

Meanwhile, for  $0 \leq x < 1/2$  and  $0 \leq k \leq 1$ , we have

$$\frac{1 + kx}{1 - x^2} \leq \cosh(2x) + k \cdot \sinh(2x).$$

Therefore, following from (C.10) with  $s\rho^2 = o(1)$ , we obtain that

$$\mathbb{E}_{\mathbb{P}_0} \left[ \frac{d\mathbb{P}_{v_1}}{d\mathbb{P}_0} \frac{d\mathbb{P}_{v_2}}{d\mathbb{P}_0}(Z) \right] \leq \cosh\left(\frac{2\rho^2 \cdot \langle v_1, v_2 \rangle}{\sigma^2 + s\rho^2}\right) + \alpha^2 \cdot \sinh\left(\frac{2\rho^2 \cdot \langle v_1, v_2 \rangle}{\sigma^2 + s\rho^2}\right), \quad (\text{C.11})$$

which concludes the proof of Lemma B.1.  $\square$

705 **C.2 Proof of Lemma B.3**

706 *Proof.* In what follows, we establish the upper bound of the following sum,

$$S = \frac{1}{|\mathcal{G}(s)|^2} \sum_{v_1, v_2 \in \mathcal{G}(s)} \left[ \exp\left(\frac{4\alpha^2 \rho^2 \cdot \langle v_1, v_2 \rangle}{\sigma^2 + s\rho^2}\right) \vee \cosh\left(\frac{4\rho^2 \cdot \langle v_1, v_2 \rangle}{\sigma^2 + s\rho^2}\right) \right]^n. \quad (\text{C.12})$$

707 In specific, we show that  $S = 1 + o(1)$  if it holds that

$$\gamma_n = o\left(\sqrt{\frac{s \log d}{n}} \wedge \frac{1}{\alpha^2} \cdot \frac{s \log d}{n}\right).$$

708 The proof strategy is similar to that of Theorem 3.1 by [62]. We define  $\mathcal{V}(s)$  the class of index set as  
709 follows,

$$\mathcal{V}(s) = \{\mathcal{S} \subseteq [d] : |\mathcal{S}| = s\}.$$

710 We further denote by  $\mathcal{S}_1$  and  $\mathcal{S}_2$  two independent random variables, which are uniformly distributed  
711 over  $\mathcal{V}(s)$  and

$$T = |\mathcal{S}_1 \cap \mathcal{S}_2|.$$

712 We obtain from (C.12) the following upper bound of  $S$ ,

$$S \leq \mathbb{E}_T \left[ \left\{ \exp\left(\frac{4\alpha^2 \rho^2 T}{\sigma^2 + s\rho^2}\right) \vee \cosh\left(\frac{4\rho^2 T}{\sigma^2 + s\rho^2}\right) \right\}^n \right]. \quad (\text{C.13})$$

713 Let  $\{\eta_i\}_{i \in [n]}$  be  $n$  independent Rademacher random variables and  $U$  be their sum. Following from  
714 (C.13) and the fact that  $\cosh(x) = \mathbb{E}_{\eta_i}[\exp(\eta_i x)]$ , we obtain

$$\begin{aligned} S &\leq \mathbb{E}_T \left[ \exp\left(\frac{4n\alpha^2 \rho^2 T}{\sigma^2 + s\rho^2}\right) \vee \mathbb{E}_U \left[ \exp\left(\frac{4\rho^2 UT}{\sigma^2 + s\rho^2}\right) \right] \right] \\ &= \mathbb{E}_T \mathbb{E}_U \left[ \exp\left(\frac{4n\alpha^2 \rho^2 T}{\sigma^2 + s\rho^2}\right) \vee \exp\left(\frac{4\rho^2 UT}{\sigma^2 + s\rho^2}\right) \right]. \end{aligned} \quad (\text{C.14})$$

715 We apply Fubini's theorem to calculate the right-hand side of (C.14). We first calculate the expectation  
716 with respect to  $T$ . Recall that we denote by  $T = |\mathcal{S}_1 \cap \mathcal{S}_2|$ . Therefore, it holds that

$$\begin{aligned} &\mathbb{E}_T \left[ \exp\left(\frac{4n\alpha^2 \rho^2 T}{\sigma^2 + s\rho^2}\right) \vee \exp\left(\frac{4\rho^2 UT}{\sigma^2 + s\rho^2}\right) \right] \\ &= \mathbb{E}_T \left[ \left\{ \exp\left(\frac{4n\alpha^2 \rho^2}{\sigma^2 + s\rho^2}\right) \vee \exp\left(\frac{4\rho^2 U}{\sigma^2 + s\rho^2}\right) \right\}^T \right] \\ &\leq \sup_{\mathcal{S} \in \mathcal{V}(s)} \mathbb{E}_{\mathcal{S}_2} \left[ \left\{ \exp\left(\frac{4n\alpha^2 \rho^2}{\sigma^2 + s\rho^2}\right) \vee \exp\left(\frac{4\rho^2 U}{\sigma^2 + s\rho^2}\right) \right\}^{|\mathcal{S} \cap \mathcal{S}_2|} \right], \end{aligned} \quad (\text{C.15})$$

717 where the last inequality holds since  $\mathcal{S}_1$  is uniformly distributed over  $\mathcal{V}(s)$ . We fix an arbitrary  
718  $\mathcal{S} \in \mathcal{V}(s)$  and denote by  $|\mathcal{S} \cap \mathcal{S}_2| = \sum_{i \in \mathcal{V}} v_i$ , where  $\{v_i\}_{i \in \mathcal{V}}$  are random variables that takes value  
719 one if  $i \in \mathcal{S} \cap \mathcal{S}_2$  and zero otherwise. Recall that  $\mathcal{S}_2$  is uniformly distributed over  $\mathcal{C}(s)$ . Therefore,  
720  $v_i$  takes value one with probability  $s/d$  and zero otherwise. Meanwhile, for  $i \neq j$ ,  $v_i$  and  $v_j$  are  
721 negatively associated with each other. Thus, it holds that

$$\begin{aligned} &\mathbb{E}_{\mathcal{S}_2} \left[ \left\{ \exp\left(\frac{4n\alpha^2 \rho^2}{\sigma^2 + s\rho^2}\right) \vee \exp\left(\frac{4\rho^2 U}{\sigma^2 + s\rho^2}\right) \right\}^{|\mathcal{S} \cap \mathcal{S}_2|} \right] \\ &\leq \prod_{i \in \mathcal{V}} \mathbb{E}_{v_i} \left[ \left\{ \exp\left(\frac{4n\alpha^2 \rho^2}{\sigma^2 + s\rho^2}\right) \vee \exp\left(\frac{4\rho^2 U}{\sigma^2 + s\rho^2}\right) \right\}^{v_i} \right] \\ &= \left( s/d \cdot \left[ \exp\left(\frac{4n\alpha^2 \rho^2}{\sigma^2 + s\rho^2}\right) \vee \exp\left(\frac{4\rho^2 U}{\sigma^2 + s\rho^2}\right) \right] + 1 - s/d \right)^s. \end{aligned} \quad (\text{C.16})$$

722 Since the inequality in (C.16) holds for any  $S \in \mathcal{V}(s)$ , it holds for the supreme over  $\mathcal{V}(s)$ . By  
 723 plugging (C.16) into (C.15), we obtain that

$$\begin{aligned} & \mathbb{E}_T \left[ \exp\left(\frac{4n\alpha^2\rho^2 T}{\sigma^2 + s\rho^2}\right) \vee \exp\left(\frac{4\rho^2 U T}{\sigma^2 + s\rho^2}\right) \right] \\ & \leq 1 + \sum_{k=1}^s \binom{s}{k} \left(\frac{s}{d}\right)^k \cdot \left[ \exp\left(\frac{4n\alpha^2\rho^2}{\sigma^2 + s\rho^2}\right) \vee \exp\left(\frac{4\rho^2 U}{\sigma^2 + s\rho^2}\right) - 1 \right]^k. \end{aligned} \quad (\text{C.17})$$

724 Finally, by combining (C.14) and (C.17), we obtain from Fubini's theorem that

$$\begin{aligned} S - 1 & \leq \sum_{k=1}^s \binom{s}{k} \left(\frac{s}{d}\right)^k \cdot \mathbb{E}_U \left[ \left\{ \exp\left(\frac{4n\alpha^2\rho^2}{\sigma^2 + s\rho^2}\right) \vee \exp\left(\frac{4\rho^2 U}{\sigma^2 + s\rho^2}\right) - 1 \right\}^k \right] \\ & \leq \sum_{k=1}^s \binom{s}{k} \left(\frac{s}{d}\right)^k \cdot \left[ \exp\left(\frac{4n\alpha^2\rho^2}{\sigma^2 + s\rho^2}\right) - 1 \right]^k \\ & \quad + \binom{s}{k} \left(\frac{s}{d}\right)^k \cdot \mathbb{E}_U \left[ \left\{ \exp\left(\frac{4\rho^2 U}{\sigma^2 + s\rho^2}\right) - 1 \right\}^k \middle| U \geq n\alpha^2 \right]. \end{aligned} \quad (\text{C.18})$$

725 It now suffices to show that the right-hand side of (C.18) is of order  $o(1)$ . The following lemma upper  
 726 bounds the first term on the right-hand side of (C.18).

727 **Lemma C.1** ([62]). For  $\gamma_n = s\rho^2/\sigma^2 = o(1/\alpha^2 \cdot s \log d/n)$ , it holds that

$$\sum_{k=1}^s \binom{s}{k} \left(\frac{s}{d}\right)^k \cdot \left[ \exp\left(\frac{4n\alpha^2\rho^2}{\sigma^2 + s\rho^2}\right) - 1 \right]^k = o(1). \quad (\text{C.19})$$

728 *Proof.* See §C.6 for a detailed proof.  $\square$

729 We denote by  $Q = 4\rho^2 U/(\sigma^2 + s\rho^2)$ . Note that  $\exp(x) - 1 \leq 2x$  for  $0 < x < 1$ . Therefore, the  
 730 following upper bound of the second term on the right-hand side of (C.18) holds,

$$\begin{aligned} & \sum_{k=1}^s \binom{s}{k} \left(\frac{s}{d}\right)^k \cdot \mathbb{E}_U \left[ \left\{ \exp\left(\frac{4\rho^2 U}{\sigma^2 + s\rho^2}\right) - 1 \right\}^k \middle| U \geq 0 \right] \\ & \leq \sum_{k=1}^s \left(\frac{s^2 e}{kd}\right)^k \cdot \mathbb{E}_U [(2|Q|)^k + \exp(k|Q|) \cdot \mathbb{1}\{|Q| \geq 1\}] \\ & \leq \underbrace{\sum_{k=1}^s \mathbb{E}_U \left[ \frac{2s^2 e |Q|^k}{kd} \right]}_{(i)} + \underbrace{\sum_{k=1}^s \left(\frac{s^2 e}{kd}\right)^k \cdot \mathbb{E}_U [\exp(k|Q|) \cdot \mathbb{1}\{|Q| \geq 1\}]}_{(ii)}. \end{aligned} \quad (\text{C.20})$$

731 The following Lemma establishes the upper bounds of terms (i) and (ii) in (C.20).

732 **Lemma C.2** ([62]). For  $\gamma_n = s\rho^2/\sigma^2 = o(\sqrt{s \log d/n})$ , it holds that

$$\begin{aligned} T_1 & = \sum_{k=1}^s \mathbb{E}_U \left[ \frac{2s^2 e |Q|^k}{kd} \right]^k = o(1), \\ T_2 & = \sum_{k=1}^s \left(\frac{s^2 e}{kd}\right)^k \cdot \mathbb{E}_U [\exp(k|Q|) \cdot \mathbb{1}\{|Q| \geq 1\}] = o(1). \end{aligned} \quad (\text{C.21})$$

733 *Proof.* See §C.7 for a detailed proof.  $\square$

734 By combining (C.18) and (C.20), we obtain from Lemmas C.1 and C.2 that  $S - 1 = o(1)$  for

$$\gamma_n = o\left(\sqrt{\frac{s \log d}{n}} \wedge \frac{1}{\alpha^2} \cdot \frac{s \log d}{n}\right),$$

735 which concludes the proof of Lemma B.3.  $\square$

737 *Proof.* In what follows, we prove that  $T \cdot \sup_{q \in \mathcal{Q}} |\mathcal{C}(q)|/|\mathcal{G}(s)| = o(1)$  under the assumptions of  
 738 Lemma B.4. Our proof strategy is similar to that of Theorem 5.3 by [53]. As  $|\mathcal{G}(s)|$  is given, we focus  
 739 on upper bounding  $|\mathcal{C}(q)|$ . We first partition  $\mathcal{C}(q)$  into two parts, namely,  $\mathcal{C}_1(q)$  and  $\mathcal{C}_2(q)$ , where

$$\mathcal{C}_1(q) = \left\{ v \in \mathcal{G}(s) : \mathbb{E}_{\mathbb{P}_0}[q(Z)] - \mathbb{E}_{\mathbb{P}_v}[q(Z)] > \tau_q \right\},$$

740 and  $\mathcal{C}_2(q) = \mathcal{C}(q) \setminus \mathcal{C}_1(q)$ . It holds that

$$\sup_{q \in \mathcal{Q}} |\mathcal{C}(q)| \leq \sup_{q \in \mathcal{Q}} |\mathcal{C}_1(q)| + \sup_{q \in \mathcal{Q}} |\mathcal{C}_2(q)|. \quad (\text{C.22})$$

741 We introduce the following distributions,

$$\mathbb{P}_{\mathcal{C}_1(q)} = \frac{1}{|\mathcal{C}_1(q)|} \sum_{v \in \mathcal{C}_1(q)} \mathbb{P}_v, \quad \mathbb{P}_{\mathcal{C}_2(q)} = \frac{1}{|\mathcal{C}_2(q)|} \sum_{v \in \mathcal{C}_2(q)} \mathbb{P}_v.$$

742 We further denote by

$$\bar{\mathcal{C}}_\ell(q, v) = \operatorname{argmax}_{\mathcal{C}} \left\{ \frac{1}{|\mathcal{C}|} \sum_{v' \in \mathcal{C}} \mathbb{E}_{\mathbb{P}_0} \left[ \frac{d\mathbb{P}_v}{d\mathbb{P}_0} \frac{d\mathbb{P}_{v'}}{d\mathbb{P}_0}(X) \right] - 1 \mid |\mathcal{C}| = |\mathcal{C}_\ell(q)| \right\} \subseteq \mathcal{G}(s) \quad (\text{C.23})$$

743 for  $\ell \in \{1, 2\}$ . It then holds that

$$\begin{aligned} D_{\chi^2}(\mathbb{P}_{\mathcal{C}_\ell(q)}, \mathbb{P}_0) &= \mathbb{E}_{\mathbb{P}_0} \left[ \left( \frac{d\mathbb{P}_{\mathcal{C}_\ell(q)}}{d\mathbb{P}_0}(Z) - 1 \right)^2 \right] = \frac{1}{|\mathcal{C}_\ell(q)|} \sum_{v, v' \in \mathcal{C}_\ell(q)} \mathbb{E}_{\mathbb{P}_0} \left[ \frac{d\mathbb{P}_v}{d\mathbb{P}_0} \frac{d\mathbb{P}_{v'}}{d\mathbb{P}_0}(Z) \right] - 1 \\ &\leq \sup_{v \in \mathcal{C}_\ell(q)} \frac{1}{|\mathcal{C}_\ell(q)|} \sum_{v' \in \mathcal{C}_\ell(q)} \mathbb{E}_{\mathbb{P}_0} \left[ \frac{d\mathbb{P}_v}{d\mathbb{P}_0} \frac{d\mathbb{P}_{v'}}{d\mathbb{P}_0}(Z) \right] - 1 \\ &\leq \sup_{v \in \mathcal{C}_\ell(q)} \frac{1}{|\mathcal{C}_\ell(q)|} \sum_{v' \in \bar{\mathcal{C}}_\ell(q, v)} \mathbb{E}_{\mathbb{P}_0} \left[ \frac{d\mathbb{P}_v}{d\mathbb{P}_0} \frac{d\mathbb{P}_{v'}}{d\mathbb{P}_0}(Z) \right] - 1, \end{aligned} \quad (\text{C.24})$$

744 where the last inequality follows from the definition of  $\bar{\mathcal{C}}_\ell(q, v)$  in (C.23). By Lemma B.1, it holds  
 745 that

$$\mathbb{E}_{\mathbb{P}_0} \left[ \frac{d\mathbb{P}_v}{d\mathbb{P}_0} \frac{d\mathbb{P}_{v'}}{d\mathbb{P}_0}(Z) \right] \leq \cosh \left( \frac{2\rho^2 \cdot \langle v, v' \rangle}{\sigma^2 + s\rho^2} \right) + \alpha^2 \cdot \sinh \left( \frac{2\rho^2 \cdot \langle v, v' \rangle}{\sigma^2 + s\rho^2} \right). \quad (\text{C.25})$$

746 Combining (C.24) and (C.25), we conclude that

$$\begin{aligned} &1 + D_{\chi^2}(\mathbb{P}_{\mathcal{C}_\ell(q)}, \mathbb{P}_0) \\ &\leq \sup_{v \in \mathcal{C}_\ell(q)} \left\{ \frac{1}{|\mathcal{C}_\ell(q)|} \sum_{v' \in \bar{\mathcal{C}}_\ell(q, v)} \cosh \left( \frac{2\rho^2 \cdot \langle v, v' \rangle}{\sigma^2 + s\rho^2} \right) + \alpha^2 \cdot \sinh \left( \frac{2\rho^2 \cdot \langle v, v' \rangle}{\sigma^2 + s\rho^2} \right) \right\}. \end{aligned} \quad (\text{C.26})$$

747 In what follows, we calculate the sum on the right-hand side of (C.26). To achieve this, we calculate  
 748 the sum based on the value of  $\langle v, v' \rangle$ . We denote by

$$\mathcal{C}_j(v) = \{v' \in \mathcal{G}(s) : \langle v, v' \rangle = s - j\}.$$

749 Then for any choice of  $\ell$ ,  $q$ , and  $v \in \mathcal{C}_\ell(q)$ , there exists an integer  $k_\ell(q, v)$  such that

$$\bar{\mathcal{C}}_\ell(q, v) = \mathcal{C}_0(v) \cup \dots \cup \mathcal{C}_{k_\ell(q, v)-1}(v) \cup \mathcal{C}'_\ell(q, v),$$

750 where  $\mathcal{C}'_\ell(q, v) = \bar{\mathcal{C}}_\ell(q, v) \setminus \bigcup_{j=0}^{k_\ell(q, v)-1} \mathcal{C}_j(v)$ . Note that we have

$$|\mathcal{C}'_\ell(q, v)| = |\mathcal{C}_\ell(q)| - \sum_{j=0}^{k_\ell(q, v)-1} |\mathcal{C}_j(v)| < |\mathcal{C}_{k_\ell(q, v)}(v)|.$$

751 Hence, the cardinality of  $\bar{\mathcal{C}}_\ell(q, v)$  is between  $\sum_{j=0}^{k_\ell(q, v)-1} |\mathcal{C}_j(v)|$  and  $\sum_{j=0}^{k_\ell(q, v)} |\mathcal{C}_j(v)|$ . Following  
 752 form (C.26), we have

$$1 + D_{\chi^2}(\mathbb{P}_{\mathcal{C}_\ell(q)}, \mathbb{P}_0) \leq \frac{\sum_{j=0}^{k_\ell(q, v)-1} h_\alpha(j) \cdot |\mathcal{C}_j(v)| + h_\alpha(k_\ell(q, v)) \cdot |\mathcal{C}'_\ell(q, v)|}{\sum_{j=0}^{k_\ell(q, v)-1} |\mathcal{C}_j(v)| + |\mathcal{C}'_\ell(q, v)|}, \quad (\text{C.27})$$

753 where we denote by  $h_\alpha(j)$  the right-hand side of (C.25) when  $v' \in \mathcal{C}_j(v)$ . In other words, it holds  
 754 that

$$h_\alpha(j) = \cosh\left(\frac{2\rho^2(s-j)}{\sigma^2 + s\rho^2}\right) + \alpha^2 \cdot \sinh\left(\frac{2\rho^2(s-j)}{\sigma^2 + s\rho^2}\right). \quad (\text{C.28})$$

755 Note that  $h_\alpha(j)$  is monotonically decreasing as  $j$  increases. Therefore, it follows from (C.27) that

$$1 + D_{\chi^2}(\mathbb{P}_{\mathcal{C}_\ell(q)}, \mathbb{P}_0) \leq \frac{\sum_{j=0}^{k_\ell(q,v)-1} h_\alpha(j) \cdot |\mathcal{C}_j(v)|}{\sum_{j=0}^{k_\ell(q,v)-1} |\mathcal{C}_j(v)|}. \quad (\text{C.29})$$

756 Further note that  $|\mathcal{C}_j(v)| = \binom{s}{s-j} \binom{d-s}{j}$ . Therefore, it holds that

$$|\mathcal{C}_{j+1}(v)|/|\mathcal{C}_j(v)| = (s-j)(d-s-j)/(j+1)^2 \geq d/2s^2,$$

757 where  $j \in \{0, \dots, s-1\}$ ,  $v \in \mathcal{G}(s)$ , and  $s = o(d^{1/2-\delta})$ . We denote by  $\zeta = d/2s^2$ , which satisfies

758  $\zeta^{-1} = o(1)$  by the assumption that  $s = o(d^{1/2-\delta})$ . It then holds that

$$\begin{aligned} |\mathcal{C}_\ell(q)| &\leq \sum_{j=0}^{k_\ell(q,v)} |\mathcal{C}_j(v)| \leq |\mathcal{C}_s(v)| \cdot \sum_{j=0}^{k_\ell(q,v)} \zeta^{j-s} \\ &\leq \frac{\zeta^{-(s-k_\ell(q,v))} \cdot |\mathcal{G}(s)|}{1 - \zeta^{-1}} \leq 2\zeta^{-(s-k_\ell(q,v))} \cdot |\mathcal{G}(s)|. \end{aligned} \quad (\text{C.30})$$

759 For any integer  $k \geq 1$  and two positive sequences  $\{w_i\}_{i=0}^\infty$  and  $\{u_i\}_{i=0}^\infty$  such that  $w_i/w_{i-1} \geq$   
 760  $u_i/u_{i-1} > 1$ , it holds that

$$\frac{\sum_{j=0}^k w_j \cdot h_\alpha(j)}{\sum_{i=0}^k w_i} \leq \frac{\sum_{j=0}^k u_j \cdot h_\alpha(j)}{\sum_{i=0}^k u_i}. \quad (\text{C.31})$$

761 Therefore, by setting  $w_j = |\mathcal{C}_j(v)|$  and  $u_j = \zeta^j$ , we conclude from (C.29) and (C.31) that

$$\begin{aligned} 1 + D_{\chi^2}(\mathbb{P}_{\mathcal{C}_\ell(q)}, \mathbb{P}_0) &\leq \frac{\sum_{j=0}^{k_\ell(q,v)-1} \zeta^j \cdot h_\alpha(j)}{\sum_{j=0}^{k_\ell(q,v)-1} \zeta^j} \\ &= \left[ \sum_{j=0}^{k_\ell(q,v)-1} \zeta^j \cdot \cosh\left(\frac{2\rho^2(s-j)}{\sigma^2 + s\rho^2}\right) + \alpha^2 \cdot \sinh\left(\frac{2\rho^2(s-j)}{\sigma^2 + s\rho^2}\right) \right] / \sum_{j=0}^{k_\ell(q,v)-1} \zeta^j \\ &\leq \sum_{j=0}^{k_\ell(q,v)-1} \zeta^j \cdot \left\{ \cosh\left(\frac{4\rho^2(s-j)}{\sigma^2 + s\rho^2}\right) \vee \exp\left(\frac{4\alpha^2\rho^2(s-j)}{\sigma^2 + s\rho^2}\right) \right\} / \sum_{j=0}^{k_\ell(q,v)-1} \zeta^j, \end{aligned} \quad (\text{C.32})$$

762 where the last inequality follows from Lemma B.1. In what follows, we denote by

$$f(j) = \cosh\left(\frac{4\rho^2(s-j)}{\sigma^2 + s\rho^2}\right), \quad g(j) = \exp\left(\frac{4\alpha^2\rho^2(s-j)}{\sigma^2 + s\rho^2}\right) \quad (\text{C.33})$$

763 for notational simplicity. Note that

$$f(j-1)/f(j) \geq \cosh\left(\frac{4\rho^2}{\sigma^2 + s\rho^2}\right).$$

764 Therefore, it holds for  $j \in \{0, 1, \dots, k_\ell(q, v) - 1\}$  that

$$f(j) \leq f(k_\ell(q, v) - 1) \cdot \left\{ \cosh\left(\frac{4\rho^2}{\sigma^2 + s\rho^2}\right) \right\}^{k_\ell(q, v) - j - 1}. \quad (\text{C.34})$$

765 Meanwhile, we have

$$g(j) = \exp(4\alpha^2\rho^2(s-j)\sigma^2 + s\rho^2) = g(k_\ell(q, v) - 1) \cdot \left\{ \exp\left(\frac{4\alpha^2\rho^2}{\sigma^2 + s\rho^2}\right) \right\}^{k_\ell(q, v) - j - 1}. \quad (\text{C.35})$$

766 We denote by

$$\Gamma(s, \rho) = \exp\left(\frac{4\alpha^2\rho^2}{\sigma^2 + s\rho^2}\right) \vee \cosh\left(\frac{4\rho^2}{\sigma^2 + s\rho^2}\right). \quad (\text{C.36})$$

767 Combining (C.34) and (C.35), we conclude that

$$f(j) \vee g(j) \leq \left\{ f(k_\ell(q, v) - 1) \vee g(k_\ell(q, v) - 1) \right\} \cdot (\Gamma(s, \rho))^{k_\ell(q, v) - j - 1}. \quad (\text{C.37})$$

768 Following from (C.32) and (C.37), it holds that

$$1 + D_{\chi^2}(\mathbb{P}_{\mathcal{C}_\ell(q)}, \mathbb{P}_0) \leq \left\{ f(k_\ell(q, v) - 1) \vee g(k_\ell(q, v) - 1) \right\} \cdot \frac{\sum_{j=0}^{k_\ell(q, v)-1} \zeta^j \cdot (\Gamma(s, \rho))^{k_\ell(q, v)-j-1}}{\sum_{j=0}^{k_\ell(q, v)-1} \zeta^j}. \quad (\text{C.38})$$

769 By direct calculation, we obtain

$$\begin{aligned} \frac{\sum_{j=0}^{k_\ell(q, v)-1} \zeta^j \cdot (\Gamma(s, \rho))^{k_\ell(q, v)-j-1}}{\sum_{j=0}^{k_\ell(q, v)-1} \zeta^j} &= \frac{\zeta^{k_\ell(q, v)-1} \cdot \sum_{j=0}^{k_\ell(q, v)-1} (\Gamma(s, \rho)/\zeta)^{k_\ell(q, v)-j-1}}{\zeta^{k_\ell(q, v)-1} \cdot \sum_{j=0}^{k_\ell(q, v)-1} \zeta^{-(k_\ell(q, v)-j-1)}} \\ &= \frac{1 - (\Gamma(s, \rho)/\zeta)^{k_\ell(q, v)}}{1 - \zeta^{-k_\ell(q, v)}} \cdot \frac{1 - \zeta^{-1}}{1 - \Gamma(s, \rho)/\zeta}. \end{aligned} \quad (\text{C.39})$$

770 Note that  $\Gamma(s, \rho) \geq 1$ . Therefore, the following upper bound of the right-hand side of (C.39) holds,

$$\frac{1 - (\Gamma(s, \rho)/\zeta)^{k_\ell(q, v)}}{1 - \zeta^{-k_\ell(q, v)}} \cdot \frac{1 - \zeta^{-1}}{1 - \Gamma(s, \rho)/\zeta} \leq \frac{1 - \zeta^{-1}}{1 - \Gamma(s, \rho)/\zeta}. \quad (\text{C.40})$$

771 Combining (C.38), (C.39), and (C.40), we conclude that

$$1 + D_{\chi^2}(\mathbb{P}_{\mathcal{C}_\ell(q)}, \mathbb{P}_0) \leq \left\{ f(k_\ell(q, v) - 1) \vee g(k_\ell(q, v) - 1) \right\} \cdot \frac{1 - \zeta^{-1}}{1 - \Gamma(s, \rho)/\zeta}, \quad (\text{C.41})$$

772 where  $f(j)$  and  $g(j)$  are defined in (C.33). Meanwhile, by Lemma 4.5 of [53], it holds that

$$D_{\chi^2}(\mathbb{P}_{\mathcal{C}_\ell(q)}, \mathbb{P}_0) \geq \log(T/\xi)/n. \quad (\text{C.42})$$

773 We denote by  $\tau^2$  the right-hand side of (C.42). Combining (C.41) and (C.42), we have

$$\tau^2 + 1 \leq \left\{ f(k_\ell(q, v) - 1) \vee g(k_\ell(q, v) - 1) \right\} \cdot \frac{1 - \zeta^{-1}}{1 - \Gamma(s, \rho)/\zeta}.$$

774 Therefore, one of the following inequalities holds,

$$\begin{aligned} (1 + \tau^2) \cdot \frac{1 - \Gamma(s, \rho)/\zeta}{1 - \zeta^{-1}} &\leq g(k_\ell(q, v) - 1) = \exp\left(\frac{4\alpha^2\rho^2 \cdot (s - k_\ell(q, v) + 1)}{\sigma^2 + s\rho^2}\right), \\ (1 + \tau^2) \cdot \frac{1 - \Gamma(s, \rho)/\zeta}{1 - \zeta^{-1}} &\leq f(k_\ell(q, v) - 1) \leq \exp\left(\frac{2\rho^4 \cdot (s - k_\ell(q, v) + 1)^2}{(\sigma^2 + s\rho^2)^2}\right), \end{aligned} \quad (\text{C.43})$$

775 where the second inequality holds because of the fact that  $\cosh(x) \leq \exp(x^2/2)$ . We take the  
776 logarithm of (C.43) and obtain that one of the following inequalities holds,

$$\begin{aligned} \log(1 + \tau^2) + \log\left(\frac{1 - \zeta^{-1}}{1 - \Gamma(s, \rho)/\zeta}\right) &\leq \frac{4\alpha^2\rho^2 \cdot (s - k_\ell(q, v) + 1)}{\sigma^2 + s\rho^2}, \\ \log(1 + \tau^2) + \log\left(\frac{1 - \zeta^{-1}}{1 - \Gamma(s, \rho)/\zeta}\right) &\leq \frac{2\rho^4 \cdot (s - k_\ell(q, v) + 1)^2}{(\sigma^2 + s\rho^2)^2}. \end{aligned} \quad (\text{C.44})$$

777 Following from the definition of  $\Gamma(s, \rho)$  in (C.36), we have  $\Gamma(s, \rho)/\zeta = o(1)$ . By Taylor's expansion,  
778 it holds that

$$\log\left(\frac{1 - \zeta^{-1}}{1 - \Gamma(s, \rho)/\zeta}\right) = \log\left(1 - \zeta^{-1} \cdot \frac{1 - \Gamma(s, \rho)}{1 - \Gamma(s, \rho)/\zeta}\right) = O(\zeta^{-1}\rho^4 \vee \zeta^{-1}\alpha^2\rho^2). \quad (\text{C.45})$$

779 For  $\gamma_n = s\rho^2/\delta^2 = o(\sqrt{s^2/n} \wedge 1/\alpha^2 \cdot s/n)$ , where  $\sigma^2$  is a constant, it holds that  $\alpha^2\rho^2 \vee \rho^4 = o(1/n)$ .

780 Hence, the right-hand side of (C.45) is negligible compared with  $\log(1 + \tau^2)$ . Then following from  
781 (C.44), it holds that

$$s - k_\ell(q, v) + 1 \geq \sqrt{\frac{(\sigma^2 + s\rho^2)^2 \cdot \log(1 + \tau^2)}{2\rho^4}} \bigwedge \sqrt{\frac{(\sigma^2 + s\rho^2) \cdot \log(1 + \tau^2)}{4\alpha^2\rho^2}}. \quad (\text{C.46})$$

782 Note that  $\log(1 + \tau^2) \geq \tau^2/2 = \log(T/\xi)/(2n)$  for  $\tau < 1$ . Therefore, by combining (C.30) and  
 783 (C.46), we conclude that

$$T \cdot \frac{\sup_{q \in \mathcal{Q}} |\mathcal{C}(q)|}{|\mathcal{G}(s)|} \leq 4T \cdot \exp \left( -\log \zeta \cdot \left\{ \sqrt{\frac{(\sigma^2 + s\rho^2)^2 \cdot \log(T/\xi)}{4n\rho^4}} - 1 \vee \sqrt{\frac{(\sigma^2 + s\rho^2) \cdot \log(T/\xi)}{8n\alpha^2\rho^2}} - 1 \right\} \right). \quad (\text{C.47})$$

784 Note that  $\rho^4 \cdot n \vee \alpha^2 \rho^2 \cdot n = o(1)$  for  $s\rho^2/\sigma^2 = o(\sqrt{s^2/n} \wedge 1/\alpha^2 \cdot s/n)$ . We choose an absolute  
 785 constant  $C > 0$  satisfying  $\delta(C-1) > \mu$ , where  $\mu$  and  $\delta$  are absolute constants such that  $T = O(d^\mu)$   
 786 and  $s = o(d^{1/2-\delta})$ . Then it holds for a sufficiently large  $n$  that

$$\begin{aligned} & \sqrt{\frac{(\sigma^2 + s\rho^2)^2 \cdot \log(T/\xi)}{4n\rho^4}} \vee \sqrt{\frac{(\sigma^2 + s\rho^2) \cdot \log(T/\xi)}{8n\alpha^2\rho^2}} \\ & \geq \sqrt{\frac{(\sigma^2 + s\rho^2)^2 \cdot \log(1/\xi)}{4n\rho^4}} \vee \sqrt{\frac{(\sigma^2 + s\rho^2) \cdot \log(1/\xi)}{8n\alpha^2\rho^2}} \geq C. \end{aligned} \quad (\text{C.48})$$

787 Note that  $\zeta = d/(2s^2) = \Omega(d^\delta)$  for  $s = o(d^{1/2-\delta})$ , where  $\delta > 0$  is an absolute constant. Finally,  
 788 combining (C.47) and (C.48), we obtain that for  $T = O(d^\mu)$ ,

$$T \cdot \sup_{q \in \mathcal{Q}} |\mathcal{C}(q)|/|\mathcal{G}(s)| \leq \mathcal{O}(d^\mu \cdot \zeta^{-(C-1)}) = \mathcal{O}(d^{\mu-\delta(C-1)}) = o(1), \quad (\text{C.49})$$

789 which concludes the proof of Lemma B.4.  $\square$

#### 790 C.4 Proof of Lemma B.5

791 *Proof.* In the following proof, we denote by  $C$  and  $C'$  absolute constants, the value of which may  
 792 vary from lines to lines. We define the following unbounded query functions,

$$\begin{aligned} \tilde{q}_{1,v}(Y, X) &= \psi(Y) \cdot [s^{-1}(\mathbf{v}^\top X)^2 - 1] \cdot \mathbb{1}\{|\psi(Y)| \leq (R \cdot \log n)^{1/\nu}\}, \quad \mathbf{v} \in \bar{\mathcal{G}}(s), \\ \tilde{q}_{2,v}(Y, X) &= Y \cdot (s^{-1/2}\mathbf{v}^\top X) \cdot \mathbb{1}\{|Y| \leq (R \cdot \log n)^{1/\nu}\}, \quad \mathbf{v} \in \bar{\mathcal{G}}(s). \end{aligned} \quad (\text{C.50})$$

793 In the sequel, we first upper bound the difference between the query functions in (A.5) and the query  
 794 functions in (C.50). We then characterize the two expectations  $\mathbb{E}_{\mathbb{P}_v}[q_{i,v}(Y, X)]$  and  $\mathbb{E}_{\mathbb{P}_0}[q_{i,v}(Y, X)]$   
 795 using the corresponding expectations of  $\tilde{q}_{i,v}(Y, X)$ . Following from (A.5) and (C.50), it holds that

$$\begin{aligned} \tilde{q}_{1,v} - q_{1,v} &= \psi(Y) \cdot [s^{-1}(\mathbf{v}^\top X)^2 - 1] \cdot \mathbb{1}\{|\psi(Y)| \leq (R \cdot \log n)^{1/\nu}\} \cdot \mathbb{1}\{|\mathbf{v}^\top X| > R \cdot \sqrt{s \log n}\}, \\ \tilde{q}_{2,v} - q_{2,v} &= Y \cdot (s^{-1/2}\mathbf{v}^\top X) \cdot \mathbb{1}\{|Y| \leq (R \cdot \log n)^{1/\nu}\} \cdot \mathbb{1}\{|\mathbf{v}^\top X| > R \cdot \sqrt{s \log n}\}. \end{aligned} \quad (\text{C.51})$$

796 Then following from the Cauchy-Schwartz inequality, it holds for  $q_{1,v}$  and  $\tilde{q}_{1,v}$  that

$$\begin{aligned} & |\mathbb{E}_{\mathbb{P}_0}[q_{1,v}(Y, X) - \tilde{q}_{1,v}(Y, X)]|^2 \\ & \leq \left| \mathbb{E}_{\mathbb{P}_0}[\psi(Y) \cdot (s^{-1}(\mathbf{v}^\top X)^2 - 1)] \right|^2 \cdot \mathbb{P}_0(|\mathbf{v}^\top X| > R \cdot \sqrt{s \log n}). \end{aligned} \quad (\text{C.52})$$

797 Note that under  $H_0$ ,  $X \sim N(0, I_d)$  is the standard Gaussian distribution, which is independent of  $Y$ .  
 798 Therefore, it holds that  $\mathbb{E}_{\mathbb{P}_0}[(s^{-1}(X^\top \mathbf{v})^2 - 1)^2] = 2$ . Then following from the Cauchy-Schwartz  
 799 inequality, we obtain that

$$\begin{aligned} & \left| \mathbb{E}_{\mathbb{P}_0}[\psi(Y) \cdot (s^{-1}(\mathbf{v}^\top X)^2 - 1)] \right|^2 \cdot \mathbb{P}_0(|\mathbf{v}^\top X| > R \cdot \sqrt{s \log n}) \\ & \leq \mathbb{E}_{\mathbb{P}_0}[\psi^2(Y)] \cdot \mathbb{E}_{\mathbb{P}_0}[(s^{-1}(X^\top \mathbf{v})^2 - 1)^2] \cdot \mathbb{P}_0(|\mathbf{v}^\top X| > R \cdot \sqrt{s \log n}) \\ & = C \cdot \mathbb{P}_0(|\mathbf{v}^\top X| > R \cdot \sqrt{s \log n}) \end{aligned} \quad (\text{C.53})$$

800 for a positive absolute constant  $C$ . Note that  $X^\top \mathbf{v}/\sqrt{s} \sim N(0, 1)$  under the null hypothesis.  
 801 Following from the tail bound of standard Gaussian distribution, it holds for any  $t \geq 1$  that

$$\mathbb{P}_0(|X^\top \mathbf{v}/\sqrt{s}| \geq t) \leq 2 \exp(-t^2/2). \quad (\text{C.54})$$

802 Combining (C.52), (C.53), and (C.54), we obtain that

$$\begin{aligned} & |\mathbb{E}_{\mathbb{P}_0}[q_{1,v}(Y, X) - \tilde{q}_{1,v}(Y, X)]|^2 \leq C \cdot \mathbb{P}(|\mathbf{v}^\top X| > R \cdot s\sqrt{\log n}) \\ & \leq C \cdot \exp(-R^2 \cdot \log n/2). \end{aligned} \quad (\text{C.55})$$

803 In the following, we upper bound the distance between  $q_{1,v}(Y, X)$  and  $\tilde{q}_{1,v}(Y, X)$  under  $\mathbb{P}_v$ . Follow-  
 804 ing from the Cauchy-Schwartz inequality, it holds that

$$\begin{aligned} & |\mathbb{E}_{\mathbb{P}_{v^*}} [q_{1,v}(Y, X) - \tilde{q}_{1,v}(Y, X)]|^2 \\ & \leq \mathbb{E}_{\mathbb{P}_{v^*}} [\psi^2(Y) \cdot (s^{-1}(v^\top X)^2 - 1)^2] \cdot \mathbb{P}_{v^*}(|v^\top X| > R \cdot \sqrt{s \log n}) \\ & \leq \sqrt{\mathbb{E}_{\mathbb{P}_{v^*}} [\psi^4(Y)] \cdot \mathbb{E}_{\mathbb{P}_{v^*}} [(s^{-1}(v^\top X)^2 - 1)^4]} \cdot \mathbb{P}_{v^*}(|v^\top X| > R \cdot \sqrt{s \log n}). \end{aligned} \quad (\text{C.56})$$

805 Note that under Assumption A.1,  $\mathbb{E}_{\mathbb{P}_{v^*}} [\psi^4(Y)]$  is upper bounded. Meanwhile, we have that  
 806  $X^\top v / \sqrt{s} \sim N(0, 1)$ . Therefore, it holds for an absolute constant  $C$  that

$$|\mathbb{E}_{\mathbb{P}_{v^*}} [q_{1,v}(Y, X) - \tilde{q}_{1,v}(Y, X)]|^2 \leq C \cdot \exp(-R^2 \cdot \log n / 2). \quad (\text{C.57})$$

807 Similar arguments apply to  $q_{2,v}(Y, X)$  and  $\tilde{q}_{2,v}(Y, X)$ . Under the null hypothesis, it holds for an  
 808 absolute constant  $C'$  that

$$\begin{aligned} |\mathbb{E}_{\mathbb{P}_0} [q_{2,v}(Y, X) - \tilde{q}_{2,v}(Y, X)]|^2 & \leq \mathbb{E}_{\mathbb{P}_0} [Y^2] \cdot \mathbb{E}_{\mathbb{P}_0} [s^{-1}(X^\top v)^2] \cdot \mathbb{P}(|v^\top X| > R \cdot \sqrt{s \log n}) \\ & \leq C' \cdot \exp(-R^2 \cdot \log n / 2), \end{aligned} \quad (\text{C.58})$$

809 which also holds under the alternative hypothesis with distribution  $\mathbb{P}_{v^*}$ . Therefore, following from  
 810 (C.55), (C.57), and (C.58), it holds for a sufficiently large constant  $R$  that

$$\begin{aligned} |\mathbb{E}_{\mathbb{P}_{v^*}} [q_{1,v}(Y, X) - \tilde{q}_{1,v}(Y, X)]| & \vee |\mathbb{E}_{\mathbb{P}_0} [q_{1,v}(Y, X) - \tilde{q}_{1,v}(Y, X)]| \leq 1/n, \\ |\mathbb{E}_{\mathbb{P}_{v^*}} [q_{2,v}(Y, X) - \tilde{q}_{2,v}(Y, X)]| & \vee |\mathbb{E}_{\mathbb{P}_0} [q_{2,v}(Y, X) - \tilde{q}_{2,v}(Y, X)]| \leq 1/n, \end{aligned} \quad (\text{C.59})$$

811 which holds for any  $v \in \bar{\mathcal{G}}(s)$ . In what follows, we characterize the expectations of  $\tilde{q}_{i,v}(Y, X)$  under  
 812 the null and alternative hypotheses for  $i \in \{1, 2\}$ . We then obtain the desired bounds of  $q_{i,v}(Y, X)$   
 813 based on  $\tilde{q}_{i,v}(Y, X)$ . Note that under the null hypothesis,  $Y$  is independent of  $X$ . Then, following  
 814 from (C.50) and the fact that  $X \sim N(0, I_d)$ , it holds that

$$\mathbb{E}_{\mathbb{P}_0} [\tilde{q}_{1,v}(Y, X)] = \mathbb{E}_{\mathbb{P}_0} [\tilde{q}_{2,v}(Y, X)] = 0. \quad (\text{C.60})$$

815 Following from (A.3), we have

$$\begin{aligned} s\rho^2 - \mathbb{E}_{\mathbb{P}_{v^*}} [\tilde{q}_{1,v^*}(Y, X)] & \leq \mathbb{E}_{\mathbb{P}_{v^*}} [\psi(Y) \cdot (s^{-1}(v^{*\top} X)^2 - 1) - \tilde{q}_{1,v}(Y, X)] \\ & = \mathbb{E}_{\mathbb{P}_{v^*}} [\psi(Y) \cdot (s^{-1}(v^{*\top} X)^2 - 1) \cdot \mathbb{1}\{|\psi(Y)| > (R \cdot \log n)^{1/\nu}\}] \\ & \leq \sqrt{\mathbb{E}_{\mathbb{P}_{v^*}} [\psi^2(Y) \cdot (s^{-1}(v^{*\top} X)^2 - 1)^2]} \cdot \sqrt{\mathbb{P}_{v^*}(|\psi(Y)| > (R \cdot \log n)^{1/\nu})}, \end{aligned} \quad (\text{C.61})$$

816 where the last inequality follows from the Cauchy-Schwartz inequality. It then follows from Assump-  
 817 tion A.1 that

$$\mathbb{P}_{v^*}(|\psi(Y)| > (R \cdot \log n)^{1/\nu}) \leq C \cdot \exp(-R \cdot \log n). \quad (\text{C.62})$$

818 Meanwhile, following from the Cauchy-Schwartz inequality, it holds that

$$\mathbb{E}_{\mathbb{P}_{v^*}} [\psi^2(Y) \cdot (s^{-1}(v^{*\top} X)^2 - 1)^2] \leq \sqrt{\mathbb{E}_{\mathbb{P}_{v^*}} [\psi^4(Y)] \cdot \mathbb{E}_{\mathbb{P}_{v^*}} [(s^{-1}(v^{*\top} X)^2 - 1)^4]}, \quad (\text{C.63})$$

819 which is upper bounded by an absolute constant. Combining (C.61), (C.62), and (C.63), if it holds that  
 820  $s\rho^2/\sigma^2 = \Omega(\sqrt{s \log d/n})$ , then for sufficiently large  $n$  and constant  $R$ , we obtain that  $1/n \leq s\rho^2/4$   
 821 and

$$s\rho^2 - \mathbb{E}_{\mathbb{P}_{v^*}} [\tilde{q}_{1,v}(Y, X)] \leq s\rho^2/4. \quad (\text{C.64})$$

822 In other words, it holds that  $\mathbb{E}_{\mathbb{P}_{v^*}} [\tilde{q}_{1,v}(Y, X)] \geq 3s\rho^2/4$ . Similar arguments hold for the query  
 823 function  $\tilde{q}_{2,v}(Y, X)$ . If it holds that  $s\rho^2/\sigma^2 = \Omega(1/\alpha^2 \cdot s \log d/n)$ , then for sufficiently large  $n$  and  
 824 constant  $R$ , we obtain that  $1/n \leq \sqrt{\alpha^2 s\rho^2}/4$  and

$$\mathbb{E}_{\mathbb{P}_{v^*}} [\tilde{q}_{2,v}(Y, X)] \geq 3\sqrt{\alpha^2 s\rho^2}/4. \quad (\text{C.65})$$

825 Combining (C.59), (C.60), (C.64), and (C.65), it holds for sufficiently large  $n$  and constant  $R$  that

$$\mathbb{E}_{\mathbb{P}_0} [q_{1,v}(Y, X)] \leq 1/n, \quad \mathbb{E}_{\mathbb{P}_0} [q_{2,v}(Y, X)] \leq 1/n.$$

826 Furthermore, it holds for sufficiently large  $n$  and constant  $R$  that

$$\begin{aligned} \mathbb{E}_{\mathbb{P}_{v^*}} [q_{1,v^*}(Y, X)] & \geq s\rho^2/2, \quad \text{if } s\rho^2/\sigma^2 = \Omega(\sqrt{s \log d/n}), \\ \mathbb{E}_{\mathbb{P}_{v^*}} [q_{2,v^*}(Y, X)] & \geq \sqrt{\alpha^2 s\rho^2}/2, \quad \text{if } s\rho^2/\sigma^2 = \Omega(1/\alpha^2 \cdot s \log d/n), \end{aligned}$$

827 which concludes the proof of Lemma B.5.  $\square$

829 *Proof.* In the following proof, we denote by  $C$  and  $C'$  absolute constants, the value of which may  
 830 vary from lines to lines. We define the following unbounded query functions,

$$\begin{aligned}\tilde{q}_{1,j}(Y, X) &= \psi(Y) \cdot (X_j^2 - 1) \cdot \mathbb{1}\{|\psi(Y)| \leq (R \cdot \log n)^{1/\nu}\}, \quad j \in [d], \\ \tilde{q}_{2,j}(Y, X) &= YX_j \cdot \mathbb{1}\{|Y| \leq (R \cdot \log n)^{1/\nu}\}, \quad j \in [d].\end{aligned}\quad (\text{C.66})$$

831 The proof is similar to the proof of Lemma B.5 in §C.4. Following from (C.66) and (A.11), it holds  
 832 that

$$|\mathbb{E}_{\mathbb{P}_0}[\tilde{q}_{1,j}(Y, X) - q_{1,j}(Y, X)]|^2 \leq \mathbb{E}_{\mathbb{P}_0}[\psi^2(Y) \cdot (X_j^2 - 1)^2] \cdot \mathbb{P}_0(|X_j| \geq R \cdot \sqrt{\log n}), \quad (\text{C.67})$$

833 where the inequality follows from the Cauchy-Schwartz inequality. Under the null hypothesis,  $Y$  is  
 834 independent of  $X$ . Meanwhile, it holds that  $X \sim N(0, I_d)$ . Thus, we have  $X_j \sim N(0, 1)$ . Following  
 835 from the Gaussian tail bound in (C.54), we have

$$|\mathbb{E}_{\mathbb{P}_0}[\tilde{q}_{1,j}(Y, X) - q_{1,j}(Y, X)]|^2 \leq C \cdot \exp(-R^2 \cdot \log n/2). \quad (\text{C.68})$$

836 Therefore, for a sufficiently large constant  $R$ , the right-hand side of (C.68) is upper bounded by  $1/n^2$ .  
 837 Under the alternative hypothesis, it follows from the Cauchy-Schwartz inequality that

$$|\mathbb{E}_{\mathbb{P}_{v^*}}[\tilde{q}_{1,j}(Y, X) - q_{1,j}(Y, X)]|^2 \leq \mathbb{E}_{\mathbb{P}_{v^*}}[\psi^2(Y) \cdot (X_j^2 - 1)^2] \cdot \mathbb{P}_{v^*}(|X_j| \geq R \cdot \sqrt{\log n}) \quad (\text{C.69})$$

$$\leq \sqrt{\mathbb{E}_{\mathbb{P}_{v^*}}[\psi^4(Y)] \cdot \mathbb{E}_{\mathbb{P}_{v^*}}[(X_j^2 - 1)^4]} \cdot \mathbb{P}_{v^*}(|X_j| \geq R \cdot \sqrt{\log n}).$$

838 Following from Assumption A.1, it holds that  $\mathbb{E}_{\mathbb{P}_{v^*}}[\psi^4(Y)]$  is upper bounded under the alternative  
 839 hypothesis. Meanwhile, it holds that  $X_j \sim N(0, 1)$  under the alternative hypothesis. Therefore, for a  
 840 sufficiently large constant  $R$ , the right-hand side of (C.69) is upper bounded by  $1/n^2$ .

841 For  $q_{2,j}(X, Y)$ , we follow similar arguments. By the Cauchy-Schwartz inequality, it holds under the  
 842 null hypothesis that

$$|\mathbb{E}_{\mathbb{P}_0}[\tilde{q}_{2,j}(Y, X) - q_{2,j}(Y, X)]|^2 \leq \mathbb{E}_{\mathbb{P}_0}[Y^2 X_j^2] \cdot \mathbb{P}_0(|X_j| \geq R \cdot \sqrt{\log n}). \quad (\text{C.70})$$

843 Note that  $Y$  is independent of  $X$  and  $X_j \sim N(0, 1)$  under the null hypothesis. Thus, following from  
 844 the Gaussian tail bound, it holds for a sufficiently large constant  $R$  that

$$|\mathbb{E}_{\mathbb{P}_0}[\tilde{q}_{2,j}(Y, X) - q_{2,j}(Y, X)]|^2 \leq 1/n^2. \quad (\text{C.71})$$

845 Meanwhile, it holds under the alternative hypothesis that

$$\begin{aligned}|\mathbb{E}_{\mathbb{P}_{v^*}}[\tilde{q}_{1,j}(Y, X) - q_{1,j}(Y, X)]|^2 &\leq \mathbb{E}_{\mathbb{P}_{v^*}}[Y^2 X_j^2] \cdot \mathbb{P}_{v^*}(|X_j| \geq R \cdot \sqrt{\log n}) \\ &\leq \sqrt{\mathbb{E}_{\mathbb{P}_{v^*}}[Y^2] \cdot \mathbb{E}_{\mathbb{P}_{v^*}}[X_j^4]} \cdot \mathbb{P}_{v^*}(|X_j| \geq R \cdot \sqrt{\log n}),\end{aligned}\quad (\text{C.72})$$

846 where the above inequalities follow from the Cauchy-Schwartz inequality. Also, by Assumption A.1,  
 847 it holds that  $\mathbb{E}_{\mathbb{P}_{v^*}}[Y^4]$  is upper bounded under the alternative hypothesis. Therefore, the right-hand  
 848 side of (C.72) is upper bounded by  $1/n^2$  with a sufficiently large constant  $R$ . In conclusion, it holds  
 849 for a sufficiently large constant  $R$  that

$$\begin{aligned}|\mathbb{E}_{\mathbb{P}_0}[q_{1,j}(Y, X) - \tilde{q}_{1,j}(Y, X)]| \vee |\mathbb{E}_{\mathbb{P}_v}[q_{1,j}(Y, X) - \tilde{q}_{1,j}(Y, X)]| &\leq 1/n, \\ |\mathbb{E}_{\mathbb{P}_0}[q_{2,j}(Y, X) - \tilde{q}_{2,j}(Y, X)]| \vee |\mathbb{E}_{\mathbb{P}_v}[q_{2,j}(Y, X) - \tilde{q}_{2,j}(Y, X)]| &\leq 1/n.\end{aligned}\quad (\text{C.73})$$

850 It remains to characterize the expectations of  $\tilde{q}_{1,j}(Y, X)$  and  $\tilde{q}_{2,j}(Y, X)$  under the null and alternative  
 851 hypotheses. Note that under the null hypothesis, it holds that  $Y$  is independent of  $X$  and  $X_j \sim$   
 852  $N(0, 1)$ . Therefore, we have  $\mathbb{E}_{\mathbb{P}_0}[X_j^2 - 1] = 0$  and  $\mathbb{E}_{\mathbb{P}_0}[X_j] = 0$ , which imply

$$\begin{aligned}\mathbb{E}_{\mathbb{P}_0}[\tilde{q}_{1,j}(Y, X)] &= \mathbb{E}_{\mathbb{P}_0}[\psi(Y) \cdot (X_j^2 - 1) \cdot \mathbb{1}\{|\psi(Y)| \leq (R \cdot \log n)^{1/\nu}\}] = 0, \\ \mathbb{E}_{\mathbb{P}_0}[\tilde{q}_{2,j}(Y, X)] &= \mathbb{E}_{\mathbb{P}_0}[YX_j \cdot \mathbb{1}\{|Y| \leq (R \cdot \log n)^{1/\nu}\}] = 0.\end{aligned}\quad (\text{C.74})$$

853 Under the alternative hypothesis, it follows from (A.3) and (A.4) that

$$\mathbb{E}_{\mathbb{P}_{v^*}}[\psi(Y) \cdot (X_j^2 - 1)] \geq \rho^2 v_j^{*2}, \quad \mathbb{E}_{\mathbb{P}_v}[YX_j] = \alpha \rho v_j^*, \quad (\text{C.75})$$

854 where  $v_j^* \in \{-1, 0, 1\}$  is the  $j$ -th entry of  $v^* \in \bar{\mathcal{G}}(s)$ . For the query function  $q_{1,j}(Y, X)$ , it holds that

$$\begin{aligned} \rho^2 v_j^{*2} - \mathbb{E}_{\mathbb{P}_{v^*}} [\tilde{q}_{1,j}(Y, X)] &\leq \mathbb{E}_{\mathbb{P}_{v^*}} \left[ Y^2 (X_j^2 - 1) \cdot \mathbb{1}\{|Y| > (R \cdot \log n)^{1/\nu}\} \right] \\ &\leq \sqrt{\mathbb{E}_{\mathbb{P}_{v^*}} [Y^4 (X_j^2 - 1)^2]} \cdot \sqrt{\mathbb{P}_{v^*}(|Y| > (R \cdot \log n)^{1/\nu})} \\ &\leq C \cdot \exp(-R \cdot \log n), \end{aligned} \quad (\text{C.76})$$

855 where  $C$  is a positive absolute constant and the last inequality follows from Assumption A.1. We fix  
856 an index  $k$  such that  $v_k^* \neq 0$ . Therefore, if  $s\rho^2/\sigma^2 = \Omega(\sqrt{s \log d/n})$ , it holds for a sufficiently large  
857 constant  $R$  that

$$\rho^2 - \mathbb{E}_{\mathbb{P}_v} [\tilde{q}_{1,k}(Y, X)] \leq \rho^2/4. \quad (\text{C.77})$$

858 In other words, it holds that  $\sup_{j \in [d]} \mathbb{E}_{\mathbb{P}_v} [\tilde{q}_{1,j}(Y, X)] \geq 3\rho^2/4$ . Similarly, we have

$$\rho v_j^* - \mathbb{E}_{\mathbb{P}_{v^*}} [\tilde{q}_{1,j}(Y, X)] = \mathbb{E}_{\mathbb{P}_{v^*}} [Y X_j \cdot \mathbb{1}\{|Y| > (R \cdot \log n)^{1/\nu}\}]. \quad (\text{C.78})$$

859 Meanwhile, if  $s\rho^2/\sigma^2 = \Omega(1/\alpha^2 \cdot s \log d/n)$ , it holds for a sufficiently large constant  $R$  that

$$\begin{aligned} \left| \mathbb{E}_{\mathbb{P}_{v^*}} [Y X_j \cdot \mathbb{1}\{|Y| > (R \cdot \log n)^{1/\nu}\}] \right| \\ \leq \sqrt{\mathbb{E}_{\mathbb{P}_{v^*}} [Y^2 X_j^2]} \cdot \sqrt{\mathbb{P}_{v^*}(|Y| > (R \cdot \log n)^{1/\nu})} \leq \alpha\rho/4. \end{aligned} \quad (\text{C.79})$$

860 Recall that  $v_j^* \in \{-1, 0, 1\}$  is the  $j$ -th entry of  $v^* \in \bar{\mathcal{G}}(s)$ . Following from (C.78) and (C.79), we  
861 obtain that

$$\sup_{j \in [d]} \left| \mathbb{E}_{\mathbb{P}_{v^*}} [\tilde{q}_{1,j}(Y, X)] \right| \geq 3\alpha\rho/4. \quad (\text{C.80})$$

862 Combining (C.73), (C.74), (C.77), and (C.80), we conclude that for sufficiently large  $n$  and constant  
863  $R$ , it holds that

$$\sup_{j \in [d]} \mathbb{E}_{\mathbb{P}_0} [q_{1,j}(Y, X)] \leq 1/n, \quad \sup_{j \in [d]} \mathbb{E}_{\mathbb{P}_0} [q_{1,j}(Y, X)] \leq 1/n. \quad (\text{C.81})$$

864 Moreover, for sufficiently large  $n$  and constant  $R$ , it holds that

$$\begin{aligned} \sup_{j \in [d]} \mathbb{E}_{\mathbb{P}_v^*} [q_{1,j}(Y, X)] &\geq \rho^2/2 \text{ if } s\rho^2/\sigma^2 = \Omega(\sqrt{s \log d/n}), \\ \sup_{j \in [d]} \mathbb{E}_{\mathbb{P}_v^*} [q_{2,j}(Y, X)] &\geq \alpha\rho/2 \text{ if } s\rho^2/\sigma^2 = \Omega(1/\alpha^2 \cdot s \log d/n), \end{aligned} \quad (\text{C.82})$$

865 which concludes the proof of Lemma B.6.  $\square$

## 866 C.6 Proof of Lemma C.1

867 *Proof.* In what follows, we show that for  $\gamma_n = s\rho^2/\sigma^2 = o(1/\alpha^2 \cdot s \log d/n)$ , we have

$$T = \sum_{k=1}^s \binom{s}{k} \left(\frac{s}{d}\right)^k \cdot \exp\left(\frac{4nk\alpha^2\rho^2}{\sigma^2 + s\rho^2}\right) = o(1).$$

868 Note that if  $\gamma_n = s\rho^2/\sigma^2 = o(1/\alpha^2 \cdot s \log d/n)$ , it holds that  $\rho^2/(\sigma^2 + s\rho^2) = o(1/\alpha^2 \cdot \log d/n)$ ,  
869 where  $\sigma^2$  is a constant. Therefore, we have

$$\left(\frac{s}{d}\right)^k \cdot \exp\left(\frac{4nk\alpha^2\rho^2}{\sigma^2 + s\rho^2}\right) \leq \left(\frac{s}{d}\right)^k \cdot \exp(C \cdot k \log d) = (s \cdot d^{C-1})^k, \quad (\text{C.83})$$

870 which holds for an arbitrary positive absolute constant  $C$  and a sufficiently large  $n$ , respectively.

871 Meanwhile, note that  $s = o(d^{1/2-\delta})$  for an absolute constant  $\delta > 0$  and  $\binom{s}{k} \leq (es/k)^k$ . By (C.83),  
872 it holds that

$$\binom{s}{k} \left(\frac{s}{d}\right)^k \leq (s^2 e/k \cdot d^{C-1})^k \leq (e/k \cdot d^{C-2\delta})^k. \quad (\text{C.84})$$

873 Since  $C$  is arbitrary, we fix  $C \leq \delta$ . Following from (C.84), we obtain that

$$T = \sum_{k=1}^s \binom{s}{k} \left(\frac{s}{d}\right)^k \cdot \exp\left(\frac{4nk\alpha^2\rho^2}{\sigma^2 + s\rho^2}\right) \leq \sum_{k=1}^s (e/k \cdot d^{C-2\delta})^k = o(1),$$

874 which concludes the proof of Lemma C.1.  $\square$

875 **C.7 Proof of Lemma C.2**

876 *Proof.* In the following proof, we denote by  $C$ ,  $C'$ , and  $C''$  absolute constants, the value of which  
877 may vary from lines to lines. We first show that for  $\gamma_n = s\rho^2/\sigma^2 = o(\sqrt{s \log d/n})$ , it holds that

$$T_1 = \sum_{k=1}^s \mathbb{E}_U \left[ \left( \frac{2s^2 e Q}{kd} \right)^k \right] = o(1),$$

878 where  $Q = 4\rho^2 U/(\sigma^2 + s\rho^2)$ . Recall that  $U$  is the sum of  $n$  independent Rademacher random  
879 variables with Orlicz  $\psi_2$ -norm equal to one. Therefore, it holds that  $\|U\|_{\psi_2} \leq C\sqrt{n}$  for an absolute  
880 constant  $C$ . It then follows from the definition of Orlicz  $\psi_2$ -norm [51] that

$$\mathbb{E}_U [|Q|^k] \leq \left( \frac{\sqrt{k} \cdot 4\rho^2 \cdot \|U\|_{\psi_2}}{\sigma^2 + s\rho^2} \right)^k \leq \left( \frac{C\rho^2 \sqrt{nk}}{\sigma^2 + s\rho^2} \right)^k. \quad (\text{C.85})$$

881 Following from (C.85), it holds that

$$T_1 \leq \sum_{k=1}^s \mathbb{E}_U \left[ \frac{2s^2 e |Q|}{kd} \right]^k \leq \sum_{k=1}^s \left( C e \cdot \frac{s^2 \rho^2 \sqrt{n}}{\sigma^2 d \sqrt{k}} \right)^k. \quad (\text{C.86})$$

882 For  $s\rho^2/\sigma^2 = o(\sqrt{s \log d/n})$  and  $s = o(d^{1/2-\delta})$ , it holds that

$$s\sqrt{n}/d \cdot s\rho^2/\sigma^2 = o(s/d \cdot \sqrt{s \log d}) = o(1). \quad (\text{C.87})$$

883 Combining (C.86) and (C.87), we obtain that  $T_1 = o(1)$ . It remains to show that

$$T_2 = \sum_{k=1}^s \left( \frac{s^2 e}{kd} \right)^k \cdot \mathbb{E}_U [\exp(k|Q|) \cdot \mathbf{1}\{|Q| \geq 1\}] = o(1).$$

884 By integration by parts, we have

$$\mathbb{E} [\exp(k|Q|) \cdot \mathbf{1}\{|Q| \geq 1\}] = \exp(k) \cdot \mathbb{P}(|Q| \geq 1) + \int_1^\infty k \cdot \exp(tk) \cdot \bar{F}_{|Q|}(t) dt. \quad (\text{C.88})$$

885 Note that  $Q = 4\rho^2 U/(\sigma^2 + s\rho^2)$  is symmetric and sub-Gaussian with Orlicz  $\psi_2$ -norm upper bounded  
886 by  $\|Q\|_{\psi_2} \leq C\rho^2 \sqrt{n}/(\sigma^2 + s\rho^2)$  for an absolute constant  $C$ . Thus, it holds that

$$\mathbb{P}(Q \geq t) \leq C_1 \cdot \exp \left( -\frac{C_2 \cdot t^2 (\sigma^2 + s\rho^2)^2}{\rho^4 n} \right), \quad (\text{C.89})$$

887 where  $C_1$  and  $C_2$  are positive absolute constants. Then for the right-hand side of (C.88), it holds that

$$\begin{aligned} & \int_1^\infty k \cdot \exp(tk) \cdot \bar{F}_{|Q|}(t) dt \\ & \leq C_1 k \cdot \exp \left( \frac{k^2 \rho^4 n}{4C_2 (\sigma^2 + s\rho^2)^2} \right) \cdot \int_1^\infty \exp \left( -\frac{C_2 (\sigma^2 + s\rho^2)^2}{\rho^4 n} \cdot \left( t - \frac{k\rho^4 n}{2C_2 (\sigma^2 + s\rho^2)} \right)^2 \right) dt \\ & \leq C k \cdot \exp \left( \frac{k^2 \rho^4 n}{4C_2 (\sigma^2 + s\rho^2)^2} \right) \cdot \frac{\rho^2 \sqrt{n}}{\sigma^2 + s\rho^2}, \end{aligned} \quad (\text{C.90})$$

888 where  $C$  is a positive absolute constant. Meanwhile, for  $s\rho^2/\sigma^2 = o(\sqrt{s \log d/n})$ , it holds for the  
889 right-hand side of (C.90) that

$$\exp \left( \frac{k^2 \rho^4 n}{4C_2 (\sigma^2 + s\rho^2)^2} \right) \cdot \frac{\rho^2 \sqrt{n}}{\sigma^2 + s\rho^2} \leq C' \sqrt{\log d/s} \cdot \exp(C_0 k^2 \log d/s), \quad (\text{C.91})$$

890 which holds for an arbitrary positive absolute constant  $C_0$  and a sufficiently large  $n$ , respectively.

891 Here  $C'$  is a positive absolute constant. Combining (C.88), (C.90), and (C.91), we conclude that

$$\begin{aligned} T_2 &= \sum_{k=1}^s \left( \frac{s^2 e}{kd} \right)^k \cdot \mathbb{E}_U [\exp(k|Q|) \cdot \mathbf{1}\{|Q| \geq 1\}] \\ &\leq C_1 \sum_{k=1}^s \left( \frac{s^2 e^2}{kd} \right)^k + C'' \sqrt{\log d/s} \cdot \sum_{k=1}^s k \cdot \left( \frac{s^2 e^2}{kd} \cdot \exp(C_0 k \log d/s) \right)^k. \end{aligned} \quad (\text{C.92})$$

892 Note that  $s = o(d^{1/2-\delta})$  for a positive absolute constant  $\delta$ . Thus, it holds that  $s^2 e^2 / (kd) = o(1)$  for  
 893  $0 \leq k \leq s$ , which implies that

$$\sum_{k=1}^s \left( \frac{s^2 e^2}{kd} \right)^k = o(1). \quad (\text{C.93})$$

894 Meanwhile, it holds for any  $1 \leq k \leq s$  that

$$\frac{s^2 e^2}{kd} \cdot \exp(C_0 k \log d/s) \leq \frac{s^2 e^2}{kd} \cdot \exp(C_0 \log d) \leq e^2 / d^{2\delta - C_0}. \quad (\text{C.94})$$

895 Since  $C_0$  is arbitrary, we fix  $C_0 > 2\delta$ . It then holds for a positive absolute constant  $C$  that

$$\sqrt{\log d/s} \cdot \sum_{k=1}^s k \cdot \left( \frac{s^2 e^2}{kd} \cdot \exp(C_0 k \log d/s) \right)^k \leq C \cdot \sqrt{\log d/s} \cdot e^2 / d^{2\delta - C_0} = o(1). \quad (\text{C.95})$$

896 Combining (C.92), (C.93), and (C.95), we obtain that  $T_2 = o(1)$ , which concludes the proof of  
 897 Lemma C.2.  $\square$

## 898 D Upper Bounds for General Cases

899 In this section, we characterize the upper bounds for the hypothesis testing problem in (A.1) under  
 900 the general setting. In specific, we consider the hypothesis testing problem that takes the form

$$H_0: Y = \epsilon_0 \text{ versus } H_1: Y = \begin{cases} f_1(X^\top \beta^*) + \epsilon, & \text{with probability } \alpha, \\ f_2(X^\top \beta^*) + \epsilon, & \text{with probability } 1 - \alpha. \end{cases} \quad (\text{D.1})$$

901 Here  $\epsilon$  is a Gaussian noise with variance  $\sigma^2$ ,  $\epsilon_0$  is a noise such that the variances of  $Y$  under the  
 902 null and alternative hypotheses are the same. Besides,  $f_1 \in \mathcal{C}_1 \cap \mathcal{C}(\psi)$  and  $f_2 \in \mathcal{C}_2 \cap \mathcal{C}(\psi)$  are two  
 903 unknown link functions, where  $\mathcal{C}_1(\psi)$ ,  $\mathcal{C}_2(\psi)$ , and  $\mathcal{C}(\psi)$  are defined in (2.4) and (2.5). Meanwhile,  
 904 we set  $X \sim N(0, I_d)$  and

$$(\beta^*, \sigma) \in \mathcal{G}_1(s, \gamma_n) = \{(\beta^*, \sigma) \in \mathbb{R}^{d+1}: \|\beta^*\|_0 = s, \kappa(\beta^*, \sigma) \geq \gamma_n\} \quad (\text{D.2})$$

905 under the alternative hypothesis, where  $\kappa(\beta^*, \sigma) = \|\beta^*\|_2^2 / \sigma^2$  is the SNR. We further denote by

$$\mathcal{H}(s, \gamma_n) = \{\beta^* \in \mathbb{R}^d: \|\beta^*\|_2^2 / \sigma^2 = s \rho^2 / \sigma^2 \geq \gamma_n, \|\beta^*\|_0 = s\}. \quad (\text{D.3})$$

906 We denote by  $Z = (Y, X)$  and  $\mathbb{P}_0, \mathbb{P}_{\beta^*}$  be the distributions of  $Z$  under the null and alternative  
 907 hypotheses, respectively. We assume that the Assumption A.1 holds. We denote by

$$\mathcal{V}(s) = \{\mathcal{S} \in [d]: |\mathcal{S}| = s\}$$

908 the class of index sets. For each index set  $\mathcal{S} \in \mathcal{V}(s)$ , we denote by  $\mathcal{B}(\mathcal{S})$  the  $s$ -sparse unit sphere that  
 909 is supported on the index set  $\mathcal{S}$ . We further denote by  $\mathcal{N}(\epsilon, \mathcal{S}) \subseteq \mathcal{B}(\mathcal{S})$  the minimum  $\epsilon$ -covering of  
 910 the  $s$ -sparse unit sphere  $\mathcal{B}(\mathcal{S})$ . In other words, it holds for any  $u \in \mathcal{B}(\mathcal{S})$  that  $\|u - v\|_2 \leq \epsilon$  for some  
 911  $v \in \mathcal{N}(\epsilon, \mathcal{S})$ . Meanwhile,  $\mathcal{N}(\epsilon, \mathcal{S})$  attains the smallest cardinality among the sets that have such a  
 912 property. It then holds that

$$|\mathcal{N}(\epsilon, \mathcal{S})| \leq C_0 \cdot (1 + 2/\epsilon)^s, \quad (\text{D.4})$$

913 where  $C_0$  is a positive absolute constant. We define

$$\mathcal{N}(\epsilon) = \bigcup_{\mathcal{S} \in \mathcal{V}(s)} \mathcal{N}(\epsilon, \mathcal{S}). \quad (\text{D.5})$$

914 Therefore, it holds that

$$|\mathcal{N}(\epsilon)| \leq C_0 \cdot (1 + 2/\epsilon)^s \cdot \binom{d}{s}. \quad (\text{D.6})$$

915 In what follows, we construct test functions based on  $v \in \mathcal{N}(1/2)$ . We introduce the following query  
 916 functions for  $v \in \mathcal{N}(1/2)$ ,

$$\begin{aligned} q_{1,v}(Y, X) &= \psi(Y) \cdot [(v^\top X)^2 - 1] \cdot \mathbb{1}\{|\psi(Y)| \leq (R \log n)^{1/\nu}\} \cdot \mathbb{1}\{|v^\top X| \leq R \cdot \sqrt{\log n}\}, \\ q_{2,v}(Y, X) &= Y \cdot (v^\top X) \cdot \mathbb{1}\{|Y| \leq (R \log n)^{1/\nu}\} \cdot \mathbb{1}\{|v^\top X| \leq R \cdot \sqrt{\log n}\}. \end{aligned} \quad (\text{D.7})$$

917 We denote by  $\bar{Z}_{1,v}$  and  $\bar{Z}_{2,v}$  the responses of the statistical oracle to query functions  $q_{1,v}$  and  $q_{2,v}$ , as  
 918 defined in Definition 2.3. We define the test functions  $\phi_1$  and  $\phi_2$  as

$$\phi_1 = \mathbb{1}\left\{ \sup_{v \in \bar{\mathcal{G}}(s)} \bar{Z}_{1,v} \geq \tau_1 \right\}, \quad \phi_2 = \mathbb{1}\left\{ \sup_{v \in \bar{\mathcal{G}}(s)} \bar{Z}_{2,v} \geq \tau_2 \right\}, \quad (\text{D.8})$$

where we set the thresholds  $\tau_1$  and  $\tau_2$  to be

$$\tau_1 = CR^{2+1/\nu} \cdot (\log n)^{1+1/\nu} \cdot \sqrt{\frac{s \log d}{n}}, \quad \tau_2 = C'R^{1+1/\nu} \cdot (\log n)^{1/2+1/\nu} \cdot \sqrt{\frac{s \log d}{n}}, \quad (\text{D.9})$$

where  $C$  and  $C'$  are positive absolute constants that will be specified in §D.1. We define the test function as  $\phi = \phi_1 \vee \phi_2$ . Following from (D.6), the capacity of  $\mathcal{Q}_\phi$  is upper bounded as follows,

$$|\mathcal{Q}_\phi| \leq 2C_0 \cdot 5^s \cdot \binom{d}{s}. \quad (\text{D.10})$$

The following theorem characterizes an upper bound for the minimax separation rate by quantifying the SNR for  $\phi$  to be asymptotically powerful.

**Theorem D.1.** We consider the hypothesis testing problem in (D.1) under Assumption A.1. For

$$\gamma_n = \Omega\left((\log n)^{1+1/\nu} \cdot \sqrt{\frac{s \log d}{n}} \bigwedge \frac{(\log n)^{1+2/\nu}}{\alpha^2} \cdot \frac{s \log d}{n}\right), \quad (\text{D.11})$$

it holds that  $R_n(\phi; \mathcal{G}_0, \mathcal{G}_1) = O(1/d)$ . In other words,  $\phi$  is asymptotically powerful.

*Proof.* See §D.1 for a detailed proof.  $\square$

To construct a computationally tractable test, we define query functions as follows,

$$\begin{aligned} q_{1,j}(Y, X) &= \psi(Y) \cdot (X_j^2 - 1) \cdot \mathbb{1}\{|\psi(Y)| \leq (R \log n)^{1/\nu}\} \cdot \mathbb{1}\{|X_j| \leq R\sqrt{\log n}\}, \quad j \in [d] \\ q_{2,j}(Y, X) &= Y \cdot X_j \cdot \mathbb{1}\{|Y| \leq (R \log n)^{1/\nu}\} \cdot \mathbb{1}\{|X_j| \leq R\sqrt{\log n}\}, \quad j \in [d]. \end{aligned} \quad (\text{D.12})$$

We denote by  $\bar{Z}_{1,j}$  and  $\bar{Z}_{2,j}$  the responses of the statistical oracle to the query functions  $q_{1,j}$  and  $q_{2,j}$ , as defined in Definition 2.3. We define the test functions  $\tilde{\phi}_1$  and  $\tilde{\phi}_2$  as

$$\tilde{\phi}_1 = \mathbb{1}\left\{\sup_{j \in [d]} \bar{Z}_{1,j} \geq \tilde{\tau}_1\right\}, \quad \tilde{\phi}_2 = \mathbb{1}\left\{\sup_{j \in [d]} \bar{Z}_{2,j} \geq \tilde{\tau}_2\right\} \bigvee \mathbb{1}\left\{\inf_{j \in [d]} \bar{Z}_{2,j} \leq -\tilde{\tau}_2\right\}, \quad (\text{D.13})$$

where we set the thresholds  $\tilde{\tau}_1$  and  $\tilde{\tau}_2$  to be

$$\tilde{\tau}_1 = CR^{2+1/\nu}(\log n)^{1+1/\nu} \cdot \sqrt{\frac{\log d}{n}}, \quad \tilde{\tau}_2 = C'R^{1+1/\nu}(\log n)^{1/2+1/\nu} \cdot \sqrt{\frac{\log d}{n}}. \quad (\text{D.14})$$

We define the test function  $\tilde{\phi} = \tilde{\phi}_1 \vee \tilde{\phi}_2$ . Therefore, the test function  $\tilde{\phi}$  is with capacity of query functions  $|\mathcal{Q}_{\tilde{\phi}}| = 2d$ . The following theorem holds, which characterizes the minimum SNR required for the test function  $\tilde{\phi}$  to be asymptotically powerful.

**Theorem D.2.** We consider the hypothesis testing problem in (D.1) under Assumption A.1. For

$$\gamma_n = \Omega\left((\log n)^{1+1/\nu} \cdot \sqrt{\frac{s^2 \log d}{n}} \bigwedge \frac{(\log n)^{1+2/\nu}}{\alpha^2} \cdot \frac{s \log d}{n}\right), \quad (\text{D.15})$$

it holds that  $\bar{R}_n(\tilde{\phi}; \mathcal{G}_0, \mathcal{G}_1) = O(1/d)$ . In other words,  $\tilde{\phi}$  is asymptotically powerful.

*Proof.* See §D.2 for a detailed proof.  $\square$

## D.1 Proof of Theorem D.1

*Proof.* The proof is similar to that of Theorem A.2 in §B.3. Recall that we denote by  $\mathbb{P}_0$  and  $\mathbb{P}_{\beta^*}$  the distributions of  $Z = (Y, X)$  under the null and alternative hypotheses, respectively. The following lemma holds, which characterizes the expectation of  $q_{1,v}$  and  $q_{2,v}$  under the null and alternative hypotheses, respectively.

**Lemma D.3.** For any  $v \in \mathcal{N}(1/2)$ ,  $\beta^* \in \mathcal{H}(s, \gamma_n)$ , and

$$\gamma_n = \Omega\left((\log n)^{1+1/\nu} \cdot \sqrt{\frac{s \log d}{n}} \bigwedge \frac{(\log n)^{1+2/\nu}}{\alpha^2} \cdot \frac{s \log d}{n}\right),$$

it holds that

$$\mathbb{E}_{\mathbb{P}_0}[q_{1,v}(Y, X)] \leq 1/n, \quad \mathbb{E}_{\mathbb{P}_0}[q_{2,v}(Y, X)] \leq 1/n. \quad (\text{D.16})$$

944 In addition, it holds that

$$\begin{aligned} \sup_{v \in \mathcal{N}(1/2)} \mathbb{E}_{\mathbb{P}_{\beta^*}} [q_{1,v}(Y, X)] &\geq s\rho^2/2 \text{ if } \gamma_n = \Omega\left((\log n)^{1+1/\nu} \cdot \sqrt{\frac{s \log d}{n}}\right), \\ \sup_{v \in \mathcal{N}(1/2)} \mathbb{E}_{\mathbb{P}_{\beta^*}} [q_{2,v}(Y, X)] &\geq \sqrt{\alpha^2 s \rho^2}/2 \text{ if } \gamma_n = \Omega\left(\frac{(\log n)^{1+2/\nu}}{\alpha^2} \cdot \frac{s \log d}{n}\right). \end{aligned} \quad (\text{D.17})$$

945 *Proof.* See §D.3 for a detailed proof.  $\square$

946 It now suffices to upper bound the risk of  $\phi = \phi_1 \vee \phi_2$ , where  $\phi_1$  and  $\phi_2$  are defined in (D.8). Recall  
947 that we define the threshold  $\tau_1$  and  $\tau_2$  as

$$\tau_1 = CR^{2+1/\nu} \cdot (\log n)^{1+1/\nu} \cdot \sqrt{\frac{s \log d}{n}}, \quad \tau_2 = C'R^{1+1/\nu} \cdot (\log n)^{1/2+1/\nu} \cdot \sqrt{\frac{s \log d}{n}}, \quad (\text{D.18})$$

948 where  $C$  and  $C'$  are positive absolute constants. Note that for the test function  $\phi$ , the capacity of  
949 query functions is upper bounded in (D.10). Therefore, following from (2.12) with  $\xi = 1/d$ , it holds  
950 for a sufficiently large  $n$  that

$$\begin{aligned} \tau_{q_{1,v}} &\leq C_1 R^{2+1/\nu} (\log n)^{1/2+1/\nu} \cdot \sqrt{\frac{s \log d}{n}}, \\ \tau_{q_{2,v}} &\leq C_2 R^{1+1/\nu} (\log n)^{1/2+1/\nu} \cdot \sqrt{\frac{s \log d}{n}}, \end{aligned} \quad (\text{D.19})$$

951 where  $\tau_{q_{1,v}}$  and  $\tau_{q_{2,v}}$  are the tolerance parameters of  $q_{1,v}$  and  $q_{2,v}$  defined in Definition 2.3, and  
952  $C_1, C_2$  are positive absolute constants. We fix  $C$  and  $C'$  in (D.18) such that  $\tau_1 \geq \tau_{q_{1,v}} + 1/n$  and  
953  $\tau_2 \geq \tau_{q_{2,v}} + 1/n$ . The rest of the proof then follows a similar argument in §B.3. Recall that we  
954 denote by  $\bar{Z}_{1,v}$  and  $\bar{Z}_{2,v}$  the responses of the statistical oracle to the query functions  $q_{1,v}$  and  $q_{2,v}$ .  
955 We denote by  $\bar{\mathbb{P}}_0$  and  $\bar{\mathbb{P}}_{\beta^*}$  the distributions of response of the statistical oracle to the query functions  
956 when the true distribution of the data is  $\mathbb{P}_0$  and  $\mathbb{P}_{\beta^*}$ . Following from Lemma D.3, it holds for any  
957  $v \in \mathcal{N}(1/2)$  that

$$\bar{\mathbb{P}}_0(\bar{Z}_{i,v} \geq \tau_i) \leq \bar{\mathbb{P}}_0(|\bar{Z}_{i,v} - \mathbb{E}_{\mathbb{P}_0}[q_{i,v}(Y, X)]| \geq \tau_{q_{i,v}}), \quad i \in \{1, 2\}.$$

958 Therefore, following from (2.11) with  $\xi = 1/d$ , we obtain

$$\begin{aligned} \bar{\mathbb{P}}_0(\phi_i = 1) &= \bar{\mathbb{P}}_0\left(\sup_{v \in \mathcal{N}(1/2)} \bar{Z}_{i,v} > \tau_i\right) \\ &\leq \bar{\mathbb{P}}_0\left(\bigcup_{v \in \mathcal{N}(1/2)} \left\{|\bar{Z}_{i,v} - \mathbb{E}_{\mathbb{P}_0}[q_{i,v}(Y, X)]| > \tau_{q_{i,v}}\right\}\right) \leq 2/d. \end{aligned} \quad (\text{D.20})$$

959 Recall that we define  $\phi = \phi_1 \vee \phi_2$ . Then it holds that

$$\bar{\mathbb{P}}_0(\phi = 1) \leq \bar{\mathbb{P}}_0(\phi_1 = 1) + \bar{\mathbb{P}}_0(\phi_2 = 1) = 4/d, \quad (\text{D.21})$$

960 which is an upper bound of the type-I error of  $\phi$ . It now suffices to upper bound the type-II error of  $\phi$ .  
961 If (D.11) holds, we obtain that either  $s\rho^2/4 \geq \tau_1$  or  $\sqrt{\alpha^2 s \rho^2}/4 \geq \tau_2$  for a sufficiently large  $n$ . We  
962 denote by

$$v^* \in \operatorname{argmax}_{v \in \mathcal{N}(1/2)} \mathbb{E}_{\mathbb{P}_{\beta^*}} [q_{1,v}(Y, X)], \quad u^* \in \operatorname{argmax}_{v \in \mathcal{N}(1/2)} \mathbb{E}_{\mathbb{P}_{\beta^*}} [q_{2,v}(Y, X)].$$

963 If it holds that  $s\rho^2/4 \geq \tau_1$ , then following from Lemma D.3, we obtain that

$$\begin{aligned} \bar{\mathbb{P}}_{\beta^*}(\phi_1 = 0) &= \bar{\mathbb{P}}_{\beta^*}\left(\sup_{v \in \mathcal{N}(1/2)} \bar{Z}_{1,v} < \tau_1\right) \leq \bar{\mathbb{P}}_{\beta^*}(\bar{Z}_{1,v^*} < \tau_1) \\ &\leq \bar{\mathbb{P}}_{\beta^*}\left(\bar{Z}_{1,v^*} < \mathbb{E}_{\mathbb{P}_{\beta^*}} [q_{1,v^*}(Y, X)] - \tau_1\right) \end{aligned} \quad (\text{D.22})$$

$$\leq \bar{\mathbb{P}}_{\beta^*}\left(|\bar{Z}_{1,v^*} - \mathbb{E}_{\mathbb{P}_{\beta^*}} [q_{1,v^*}(Y, X)]| > \tau_{q_{1,v^*}}\right), \quad (\text{D.23})$$

964 where the last inequality follows from the fact that  $\tau_1 > \tau_{q_{1,v^*}}$ . Therefore, following from (2.11)  
965 with  $\xi = 1/d$ , we obtain that the right-hand side of (D.22) is upper bounded by  $2/d$ . Similarly, if it

holds that  $\sqrt{\alpha^2 s \rho^2}/4 \geq \tau_2$ , we obtain

$$\begin{aligned} \bar{\mathbb{P}}_{\beta^*}(\phi_2 = 0) &= \bar{\mathbb{P}}_{\beta^*} \left( \sup_{v \in \mathcal{N}(1/2)} \bar{Z}_{1,v} < \tau_1 \right) \leq \bar{\mathbb{P}}_{\beta^*}(\bar{Z}_{2,u^*} < \tau_2) \\ &\leq \bar{\mathbb{P}}_{\beta^*} \left( |\bar{Z}_{2,u^*} - \mathbb{E}_{\mathbb{P}_{\beta^*}}[q_{2,u^*}(Y, X)]| > \tau_{q_{2,u^*}} \right), \end{aligned} \quad (\text{D.24})$$

where the last inequality follows from the fact that  $\tau_1 > \tau_{q_{1,u^*}}$ . Therefore, following from (2.11) with  $\xi = 1/d$ , we obtain that the right-hand side of (D.24) is upper bounded by  $2/d$ . Note that (D.22) and (D.24) holds for all  $(\beta^*, \sigma) \in \mathcal{G}_1(s, \gamma_n)$  if (D.11) holds. Therefore, we conclude that

$$\sup_{(\beta^*, \sigma) \in \mathcal{G}_1} \bar{\mathbb{P}}_{\beta^*}(\phi = 0) \leq \sup_{(\beta^*, \sigma) \in \mathcal{G}_1} \{ \bar{\mathbb{P}}_{\beta^*}(\phi_1 = 0) \wedge \bar{\mathbb{P}}_{\beta^*}(\phi_2 = 0) \} \leq 2/d. \quad (\text{D.25})$$

Combining (D.21) and (D.25), we obtain that if (D.11) holds, the risk of  $\phi$  is  $O(1/d)$ , which concludes the proof.  $\square$

## D.2 Proof of Theorem D.2

*Proof.* The proof is similar to that of Theorem A.3 in §B.4. Recall that we denote by  $\mathbb{P}_0$  and  $\mathbb{P}_{\beta^*}$  the distributions of  $Z = (Y, X)$  under the null and alternative hypotheses, respectively. The following lemma holds, which characterizes the expectation of  $q_{1,j}(Y, X)$  and  $q_{2,j}(Y, X)$  under the null and alternative hypotheses, respectively.

**Lemma D.4.** For any  $\beta^* \in \mathcal{H}(s, \gamma_n)$  and

$$\gamma_n = \Omega \left( (\log n)^{1+1/\nu} \cdot \sqrt{\frac{s^2 \log d}{n}} \wedge \frac{(\log n)^{1+2/\nu}}{\alpha^2} \cdot \frac{s \log d}{n} \right),$$

it holds that

$$\sup_{j \in [d]} \mathbb{E}_{\mathbb{P}_0}[q_{1,j}(Y, X)] \leq 1/n, \quad \sup_{j \in [d]} \mathbb{E}_{\mathbb{P}_0}[q_{2,j}(Y, X)] \leq 1/n. \quad (\text{D.26})$$

In addition, it holds that

$$\begin{aligned} \sup_{j \in [d]} \mathbb{E}_{\mathbb{P}_{\beta^*}}[q_{1,j}(Y, X)] &\geq \rho^2/2 \text{ if } \gamma_n = \Omega \left( (\log n)^{1+1/\nu} \cdot \sqrt{\frac{s^2 \log d}{n}} \right), \\ \sup_{j \in [d]} |\mathbb{E}_{\mathbb{P}_{\beta^*}}[q_{2,j}(Y, X)]| &\geq \alpha \rho/2 \text{ if } \gamma_n = \Omega \left( \frac{(\log n)^{1+2/\nu}}{\alpha^2} \cdot \frac{s \log d}{n} \right). \end{aligned} \quad (\text{D.27})$$

*Proof.* See §D.4 for a detailed proof.  $\square$

In what follows, we upper bound the risk of  $\tilde{\phi} = \tilde{\phi}_1 \vee \tilde{\phi}_2$  where  $\tilde{\phi}_1$  and  $\tilde{\phi}_2$  are defined in (D.13). Recall that we define the threshold  $\tilde{\tau}_1$  and  $\tilde{\tau}_2$  as

$$\tilde{\tau}_1 = C R^{2+1/\nu} (\log n)^{1+1/\nu} \cdot \sqrt{\frac{\log d}{n}}, \quad \tilde{\tau}_2 = C' R^{1+1/\nu} (\log n)^{1/2+1/\nu} \cdot \sqrt{\frac{\log d}{n}}, \quad (\text{D.28})$$

where  $C$  and  $C'$  are absolute constants. Note that for  $\tilde{\phi}$ , the capacity of query functions is  $2d$ . Therefore, following from (2.12) with  $\xi = 1/d$ , it holds for a sufficiently large  $n$  that

$$\tau_{q_{1,j}} \leq C_1 R^{2+1/\nu} (\log n)^{1/2+1/\nu} \cdot \sqrt{\frac{\log d}{n}}, \quad \tau_{q_{2,j}} \leq C_2 R^{1+1/\nu} (\log n)^{1/2+1/\nu} \cdot \sqrt{\frac{\log d}{n}}, \quad (\text{D.29})$$

where  $C_1$  and  $C_2$  are positive absolute constants. We fix  $C$  and  $C'$  in (D.28) such that  $\tilde{\tau}_1 > \tau_{q_{1,j}} + 1/n$  and  $\tau_2 > \tau_{12,j} + 1/n$  for a sufficiently large  $n$ . Recall that we denote by  $\bar{Z}_{1,j}$  and  $\bar{Z}_{2,j}$  the responses of the statistical oracle to the query functions  $q_{1,j}$  and  $q_{2,j}$ . We denote by  $\mathbb{P}_0$  and  $\mathbb{P}_{\beta^*}$  the distributions of response of the statistical oracle to the query functions when the true distribution of the data is  $\mathbb{P}_0$  and  $\mathbb{P}_{\beta^*}$ . Following from Lemma D.3, it holds for  $j \in [d]$  and  $i \in \{1, 2\}$  that

$$\bar{\mathbb{P}}_0(\bar{Z}_{i,j} \geq \tilde{\tau}_1) \leq \bar{\mathbb{P}}_0 \left( |\bar{Z}_{i,j} - \mathbb{E}_{\mathbb{P}_0}[q_{i,j}(Y, X)]| \geq \tau_{q_{i,j}} \right). \quad (\text{D.30})$$

Therefore, following from (2.11) with  $\xi = 1/d$ , it holds for  $i \in \{1, 2\}$  that

$$\begin{aligned}\bar{\mathbb{P}}_0(\tilde{\phi}_i = 1) &= \bar{\mathbb{P}}_0\left(\sup_{j \in [d]} \bar{Z}_{i,j} > \tilde{\tau}_i\right) \\ &\leq \bar{\mathbb{P}}_0\left(\bigcup_{j \in [d]} \left\{|\bar{Z}_{i,j} - \mathbb{E}_{\mathbb{P}_0}[q_{i,j}(Y, X)]| > \tau_{q_{i,j}}\right\}\right) \leq 2/d,\end{aligned}\quad (\text{D.31})$$

which further shows that

$$\bar{\mathbb{P}}_0(\tilde{\phi} = 1) \leq \bar{\mathbb{P}}_0(\tilde{\phi}_1 = 1) + \bar{\mathbb{P}}_0(\tilde{\phi}_2 = 1) \leq 4/d. \quad (\text{D.32})$$

In other words, it holds that the type-I error of  $\tilde{\phi}$  is asymptotically upper bounded by  $4/d$ . It remains to upper bound the type-II error of  $\tilde{\phi}$ . Note that if (D.15) holds, it holds that either  $\rho^2/4 \geq \tilde{\tau}_1$  or  $\alpha\rho/4 \geq \tilde{\tau}_2$  for a sufficiently large  $n$ . We denote by

$$j^* \in \operatorname{argmax}_{j \in [d]} \mathbb{E}_{\mathbb{P}_{\beta^*}}[q_{1,j}(Y, X)], \quad k^* \in \operatorname{argmax}_{j \in [d]} |\mathbb{E}_{\mathbb{P}_{\beta^*}}[q_{2,j}(Y, X)]|.$$

If it holds that  $\rho^2/4 \geq \tilde{\tau}_1$ , following from Lemma D.4, we obtain that

$$\begin{aligned}\bar{\mathbb{P}}_{\beta^*}(\tilde{\phi}_1 = 0) &\leq \bar{\mathbb{P}}_{\beta^*}\left(\sup_{j \in [d]} \bar{Z}_{1,j} < \tilde{\tau}_2\right) \leq \bar{\mathbb{P}}_{\beta^*}(\bar{Z}_{1,j^*} < \tilde{\tau}_1) \\ &\leq \bar{\mathbb{P}}_{\beta^*}\left(\bar{Z}_{1,j^*} < \mathbb{E}_{\mathbb{P}_{\beta^*}}[q_{1,j^*}(Y, X)] - \tilde{\tau}_1\right) \\ &\leq \bar{\mathbb{P}}_{\beta^*}\left(|\bar{Z}_{2,j^*} - \mathbb{E}_{\mathbb{P}_v}[q_{2,j^*}(Y, X)]| > \tau_{q_{2,j^*}}\right) \leq 2/d,\end{aligned}\quad (\text{D.33})$$

where the fourth inequality follows from the fact that  $\tilde{\tau}_1 > \tau_{q_{1,j^*}}$ , and the last inequality following from (2.11) with  $\xi = 1/d$ . If it holds that  $\alpha\rho/4 \geq \tilde{\tau}_2$ , following from Lemma D.4, we obtain that either  $\mathbb{E}_{\mathbb{P}_{\beta^*}}[q_{2,k^*}(Y, X)] \geq \alpha\rho/2$  or  $\mathbb{E}_{\mathbb{P}_{\beta^*}}[q_{2,k^*}(Y, X)] \leq -\alpha\rho/2$ . If  $\mathbb{E}_{\mathbb{P}_{\beta^*}}[q_{2,k^*}(Y, X)] \geq \alpha\rho/2$ , we obtain that

$$\begin{aligned}\bar{\mathbb{P}}_{\beta^*}(\tilde{\phi}_2 = 0) &\leq \bar{\mathbb{P}}_{\beta^*}\left(\sup_{j \in [d]} \bar{Z}_{2,j} < \tilde{\tau}_2\right) \leq \bar{\mathbb{P}}_{\beta^*}(\bar{Z}_{2,k^*} < \tilde{\tau}_2) \\ &\leq \bar{\mathbb{P}}_{\beta^*}\left(\bar{Z}_{2,k^*} < \mathbb{E}_{\mathbb{P}_{\beta^*}}[q_{2,k^*}(Y, X)] - \tilde{\tau}_2\right) \\ &\leq \bar{\mathbb{P}}_{\beta^*}\left(|\bar{Z}_{2,k^*} - \mathbb{E}_{\mathbb{P}_v}[q_{2,k^*}(Y, X)]| > \tau_{q_{2,k^*}}\right) \leq 2/d,\end{aligned}\quad (\text{D.34})$$

where the fourth inequality follows from the fact that  $\tilde{\tau}_2 > \tau_{q_{2,k^*}}$ , and the last inequality follows from (2.11) with  $\xi = 1/d$ . If it holds that  $\mathbb{E}_{\mathbb{P}_{\beta^*}}[q_{2,k^*}(Y, X)] \leq -\alpha\rho/2$ , we obtain that

$$\begin{aligned}\bar{\mathbb{P}}_{\beta^*}(\tilde{\phi}_2 = 0) &\leq \bar{\mathbb{P}}_{\beta^*}\left(\inf_{j \in [d]} \bar{Z}_{2,j} > -\tilde{\tau}_2\right) \leq \bar{\mathbb{P}}_{\beta^*}(\bar{Z}_{2,k^*} > -\tilde{\tau}_2) \\ &\leq \bar{\mathbb{P}}_{\beta^*}\left(\bar{Z}_{2,k^*} > \mathbb{E}_{\mathbb{P}_{\beta^*}}[q_{2,k^*}(Y, X)] + \tilde{\tau}_2\right) \\ &\leq \bar{\mathbb{P}}_{\beta^*}\left(|\bar{Z}_{2,k^*} - \mathbb{E}_{\mathbb{P}_v}[q_{2,k^*}(Y, X)]| > \tau_{q_{2,k^*}}\right) \leq 2/d,\end{aligned}\quad (\text{D.35})$$

where the fourth inequality follows from the fact that  $\tilde{\tau}_2 > \tau_{q_{2,k^*}}$ , and the last inequality follows from (2.11) with  $\xi = 1/d$ . Note that (D.33), (D.34), and (D.35) holds for all  $(\beta^*, \sigma) \in \mathcal{G}_1(s, \gamma_n)$  if (D.15) holds. Therefore, we obtain that

$$\sup_{(\beta^*, \sigma) \in \mathcal{G}_1} \bar{\mathbb{P}}_{\beta^*}(\tilde{\phi} = 0) \leq \sup_{(\beta^*, \sigma) \in \mathcal{G}_1} \left\{ \bar{\mathbb{P}}_{\beta^*}(\tilde{\phi}_1 = 0) \wedge \bar{\mathbb{P}}_{\beta^*}(\tilde{\phi}_2 = 0) \right\} \leq 2/d. \quad (\text{D.36})$$

Combining (D.32) and (D.36), we obtain that if (D.15) holds, the risk of  $\tilde{\phi}$  is  $O(1/d)$ , which concludes the proof of Theorem D.2.  $\square$

### D.3 Proof of Lemma D.3

*Proof.* In the following proof, we denote by  $C$  and  $C'$  absolute constants, the value of which may vary from lines to lines. We define the following query functions,

$$\begin{aligned}\tilde{q}_{1,v}(Y, X) &= \psi(Y) \cdot [(v^\top X)^2 - 1] \cdot \mathbb{1}\{|\psi(Y)| \leq (R \cdot \log n)^{1/\nu}\}, \quad v \in \bar{\mathcal{G}}(s), \\ \tilde{q}_{2,v}(Y, X) &= Y \cdot (v^\top X) \cdot \mathbb{1}\{|Y| \leq (R \cdot \log n)^{1/\nu}\}, \quad v \in \bar{\mathcal{G}}(s).\end{aligned}\quad (\text{D.37})$$

1010 Following from (D.7) and (D.37), we conclude that

$$\begin{aligned}\tilde{q}_{1,v} - q_{1,v} &= \psi(Y) \cdot [(v^\top X)^2 - 1] \cdot \mathbb{1}\{|\psi(Y)| \leq (R \cdot \log n)^{1/\nu}\} \cdot \mathbb{1}\{|v^\top X| > R \cdot \sqrt{\log n}\}, \\ \tilde{q}_{2,v} - q_{2,v} &= Y \cdot (v^\top X) \cdot \mathbb{1}\{|Y| \leq (R \cdot \log n)^{1/\nu}\} \cdot \mathbb{1}\{|v^\top X| > R \cdot \sqrt{\log n}\}.\end{aligned}\quad (\text{D.38})$$

1011 Therefore, following from the Cauchy-Schwartz inequality, we obtain from (D.38) that

$$\begin{aligned}|\mathbb{E}_{\mathbb{P}_0}[\tilde{q}_{1,v}(Y, X) - q_{1,v}(Y, X)]|^2 \\ \leq \mathbb{E}_{\mathbb{P}_0}[\psi^2(Y) \cdot [(v^\top X)^2 - 1]^2] \cdot \mathbb{P}_0(|v^\top X| \geq R \cdot \sqrt{\log n}).\end{aligned}\quad (\text{D.39})$$

1012 Further note that under the null hypothesis,  $Y$  is independent of  $X$  and  $X \sim N(0, I_d)$ . Therefore,  
1013 for  $v \in \mathcal{N}(1/2)$ , it holds that  $v^\top X \sim N(0, 1)$ . Meanwhile, following from Assumption A.1,  $Y$  has  
1014 bounded fourth moment. Therefore, we obtain from (D.39) and the tail bound of standard Gaussian  
1015 distribution in (C.54) that

$$|\mathbb{E}_{\mathbb{P}_0}[\tilde{q}_{1,v}(Y, X) - q_{1,v}(Y, X)]|^2 \leq C \cdot \exp(-R^2 \log n), \quad (\text{D.40})$$

1016 where  $C$  is a positive absolute constant. Similarly, it holds under the alternative hypothesis that

$$\begin{aligned}|\mathbb{E}_{\mathbb{P}_\beta^*}[\tilde{q}_{1,v}(Y, X) - q_{1,v}(Y, X)]|^2 \\ \leq \mathbb{E}_{\mathbb{P}_\beta^*}[\psi^2(Y) \cdot [(v^\top X)^2 - 1]^2] \cdot \mathbb{P}_0(|v^\top X| \geq R \cdot \sqrt{\log n}) \\ \leq \left( \mathbb{E}_{\mathbb{P}_\beta^*}[\psi^4(Y)] \cdot \mathbb{E}_{\mathbb{P}_\beta^*}[(v^\top X)^2 - 1]^4 \right)^{1/2} \cdot \mathbb{P}_0(|v^\top X| \geq R \cdot \sqrt{\log n}),\end{aligned}\quad (\text{D.41})$$

1017 where the above inequalities follow from the Cauchy-Schwartz inequality. Then following from  
1018 Assumption A.1 and the fact that  $X \sim N(0, I_d)$  under the alternative hypothesis, we conclude that

$$\begin{aligned}|\mathbb{E}_{\mathbb{P}_\beta^*}[\tilde{q}_{1,v}(Y, X) - q_{1,v}(Y, X)]|^2 \leq C' \cdot \mathbb{P}_{\beta^*}(|v^\top X| \geq R \cdot \sqrt{\log n}) \\ \leq C' \cdot \exp(-R^2 \log n),\end{aligned}\quad (\text{D.42})$$

1019 where  $C'$  is a positive absolute constant, and the last inequality follows from the tail bound of standard  
1020 Gaussian distribution in (C.54). Similar argument holds for the query functions  $q_{2,v}(Y, X)$  and  
1021  $\tilde{q}_{2,v}(Y, X)$ . We conclude from (D.40), (D.42) and a similar argument on  $q_{2,v}(Y, X)$  and  $\tilde{q}_{2,v}(Y, X)$   
1022 that

$$\begin{aligned}|\mathbb{E}_{\mathbb{P}_{\beta^*}}[q_{1,v}(Y, X) - \tilde{q}_{1,v}(Y, X)]| \vee |\mathbb{E}_{\mathbb{P}_0}[q_{1,v}(Y, X) - \tilde{q}_{1,v}(Y, X)]| \leq 1/n, \\ |\mathbb{E}_{\mathbb{P}_{\beta^*}}[q_{2,v}(Y, X) - \tilde{q}_{2,v}(Y, X)]| \vee |\mathbb{E}_{\mathbb{P}_0}[q_{2,v}(Y, X) - \tilde{q}_{2,v}(Y, X)]| \leq 1/n,\end{aligned}\quad (\text{D.43})$$

1023 which holds for  $v \in \mathcal{N}(1/2)$ ,  $\beta^* \in \mathcal{H}(s, \gamma_n)$ , and sufficiently large  $n$  and constant  $R$ . Note that  
1024 under the null hypothesis, it holds that  $X \sim N(0, I_d)$  and  $Y$  is independent of  $X$ . Therefore, it  
1025 follows from (D.37) that

$$\mathbb{E}_0[\tilde{q}_{1,v}(Y, X)] = \mathbb{E}_0[\tilde{q}_{2,v}(Y, X)] = 0, \quad (\text{D.44})$$

1026 which holds for all  $v \in \mathcal{N}(1/2)$ . Meanwhile, following from the definition of  $\mathcal{N}(1/2)$  in (D.5), it  
1027 holds that for any  $\beta^* \in \mathcal{H}(s, \gamma_n)$ , there exist a  $v^* \in \mathcal{N}(1/2)$  such that

$$\|\beta^*/\sqrt{s\rho^2} - v^*\|_2^2 \leq 1/4,$$

1028 which is equivalent to

$$v^{*\top} \beta^* \geq 7/8 \cdot \sqrt{s\rho^2}. \quad (\text{D.45})$$

1029 Therefore, following from (A.3) and (D.45), it holds that

$$\begin{aligned}49/64 \cdot s\rho^2 - \mathbb{E}_{\mathbb{P}_{\beta^*}}[\tilde{q}_{1,v^*}(Y, X)] &\leq (v^{*\top} \beta^*)^2 - \mathbb{E}_{\mathbb{P}_{\beta^*}}[\tilde{q}_{1,v^*}(Y, X)] \\ &\leq \mathbb{E}_{\mathbb{P}_{\beta^*}}[\psi(Y) \cdot ((v^{*\top} X)^2 - 1) - \tilde{q}_{1,v^*}(Y, X)] \\ &= \mathbb{E}_{\mathbb{P}_{\beta^*}}[\psi(Y) \cdot ((v^{*\top} X)^2 - 1) \cdot \mathbb{1}\{|\psi(Y)| > (R \cdot \log n)^{1/\nu}\}] \\ &\leq \sqrt{\mathbb{E}_{\mathbb{P}_{\beta^*}}[\psi^2(Y) \cdot ((v^{*\top} X)^2 - 1)^2]} \cdot \sqrt{\mathbb{P}_{\beta^*}(|\psi(Y)| > (R \cdot \log n)^{1/\nu})},\end{aligned}\quad (\text{D.46})$$

1030 where the last inequality follows from the Cauchy-Schwartz inequality. It then follows from the  
1031 Cauchy-Schwartz inequality and Assumption A.1 that

$$49/64 \cdot s\rho^2 - \mathbb{E}_{\mathbb{P}_{\beta^*}}[\tilde{q}_{1,v^*}(Y, X)] \leq C \cdot \exp(-R/2 \cdot \log n), \quad (\text{D.47})$$

where  $C$  is a positive absolute constant. If it holds that  $s\rho^2/\sigma^2 = \Omega(\sqrt{s \log d}/n)$ , we obtain that for sufficiently large  $n$  and constant  $R$ , it holds that  $s\rho^2/64 > 1/n$  and

$$49/64 \cdot s\rho^2 - \mathbb{E}_{\mathbb{P}_{\beta^*}} [\tilde{q}_{1,v^*}(Y, X)] \leq 1/64 \cdot s\rho^2. \quad (\text{D.48})$$

In other words, it holds that  $\mathbb{E}_{\mathbb{P}_{\beta^*}} [\tilde{q}_{1,v^*}(Y, X)] \geq 3/4 \cdot s\rho^2$ . Similarly, following from (A.4) and (D.45), we obtain

$$\begin{aligned} 7/8 \cdot \sqrt{\alpha^2 s\rho^2} - \mathbb{E}_{\mathbb{P}_{\beta^*}} [\tilde{q}_{2,v^*}(Y, X)] &\leq \alpha \cdot v^{*\top} \beta^* - \mathbb{E}_{\mathbb{P}_{\beta^*}} [\tilde{q}_{2,v^*}(Y, X)] \\ &\leq \mathbb{E}_{\mathbb{P}_{\beta^*}} [Y \cdot (v^{*\top} X) - \tilde{q}_{1,v}(Y, X)] \\ &= \mathbb{E}_{\mathbb{P}_{\beta^*}} [Y \cdot (v^{*\top} X) \cdot \mathbb{1}\{|Y| > (R \cdot \log n)^{1/\nu}\}] \\ &\leq \sqrt{\mathbb{E}_{\mathbb{P}_{\beta^*}} [Y^2 \cdot (v^{*\top} X)^2]} \cdot \sqrt{\mathbb{P}_{\beta^*}(|Y| > (R \cdot \log n)^{1/\nu})}. \end{aligned} \quad (\text{D.49})$$

Then following from the Cauchy-Schwartz inequality and Assumption A.1, we obtain that

$$7/8 \cdot \sqrt{\alpha^2 s\rho^2} - \mathbb{E}_{\mathbb{P}_{\beta^*}} [\tilde{q}_{2,v^*}(Y, X)] \leq C' \cdot \exp(-R/2 \cdot \log n), \quad (\text{D.50})$$

where  $C'$  is a positive absolute constant. If it holds that  $s\rho^2/\sigma^2 = \Omega(1/\alpha \cdot s \log d/n)$ , we obtain that for sufficiently large  $n$  and constant  $R$ , it holds that  $\sqrt{\alpha^2 s\rho^2}/8 > 1/n$  and

$$7/8 \cdot \sqrt{\alpha^2 s\rho^2} - \mathbb{E}_{\mathbb{P}_{\beta^*}} [\tilde{q}_{2,v^*}(Y, X)] \leq 1/8 \cdot \sqrt{\alpha^2 s\rho^2}. \quad (\text{D.51})$$

In other words, it holds that  $\mathbb{E}_{\mathbb{P}_{\beta^*}} [\tilde{q}_{2,v^*}(Y, X)] \geq 3/4 \cdot \sqrt{\alpha^2 s\rho^2}$ . Combining (D.43), (D.48), and (D.51), we conclude that for sufficiently large  $n$  and constant  $R$ , it holds that

$$\mathbb{E}_{\mathbb{P}_0} [q_{1,v}(Y, X)] \leq 1/n, \quad \mathbb{E}_{\mathbb{P}_0} [q_{2,v}(Y, X)] \leq 1/n.$$

Furthermore, it holds for sufficiently large  $n$  and constant  $R$  that

$$\begin{aligned} \sup_{v \in \mathcal{N}(1/2)} \mathbb{E}_{\mathbb{P}_{\beta^*}} [q_{1,v}(Y, X)] &\geq \mathbb{E}_{\mathbb{P}_{\beta^*}} [q_{1,v^*}(Y, X)] \geq s\rho^2/2, \quad \text{if } s\rho^2/\sigma^2 = \Omega(\sqrt{s \log d}/n), \\ \sup_{v \in \mathcal{N}(1/2)} \mathbb{E}_{\mathbb{P}_{\beta^*}} [q_{2,v}(Y, X)] &\geq \mathbb{E}_{\mathbb{P}_{\beta^*}} [q_{2,v^*}(Y, X)] \geq \sqrt{\alpha^2 s\rho^2}/2, \quad \text{if } s\rho^2/\sigma^2 = \Omega(1/\alpha^2 \cdot s \log d/n), \end{aligned}$$

which concludes the proof of Lemma D.3.  $\square$

#### D.4 Proof of Lemma D.4

*Proof.* In the following proof, we denote by  $C$  and  $C'$  absolute constants, the value of which may vary from lines to lines. We define the following query functions,

$$\begin{aligned} \tilde{q}_{1,j}(Y, X) &= \psi(Y) \cdot (X_j^2 - 1) \cdot \mathbb{1}\{|\psi(Y)| \leq (R \cdot \log n)^{1/\nu}\}, \quad j \in [d], \\ \tilde{q}_{2,j}(Y, X) &= Y X_j \cdot \mathbb{1}\{|Y| \leq (R \cdot \log n)^{1/\nu}\}, \quad j \in [d]. \end{aligned} \quad (\text{D.52})$$

Following from (D.13) and the Cauchy-Schwartz inequality, it holds that

$$|\mathbb{E}_{\mathbb{P}_0} [\tilde{q}_{1,j}(Y, X) - q_{1,j}(Y, X)]|^2 \leq \mathbb{E}_{\mathbb{P}_0} [\psi^2(Y) \cdot (X_j^2 - 1)^2] \cdot \mathbb{P}_0(|X_j| \geq R \cdot \sqrt{\log n}). \quad (\text{D.53})$$

Note that under the null hypothesis,  $Y$  is independent of  $X$  and  $X \sim N(0, I_d)$ . Then following from Assumption A.1 and the tail bound of standard Gaussian distribution in (C.54), it holds that

$$|\mathbb{E}_{\mathbb{P}_0} [\tilde{q}_{1,j}(Y, X) - q_{1,j}(Y, X)]|^2 \leq C \cdot \exp(-R^2 \cdot \log n), \quad (\text{D.54})$$

where  $C$  is a positive absolute constant. Under the alternative hypothesis, it holds that

$$|\mathbb{E}_{\mathbb{P}_{\beta^*}} [\tilde{q}_{1,j}(Y, X) - q_{1,j}(Y, X)]|^2 \leq \mathbb{E}_{\mathbb{P}_{\beta^*}} [\psi^2(Y) \cdot (X_j^2 - 1)^2] \cdot \mathbb{P}_{\beta^*}(|X_j| \geq R \cdot \sqrt{\log n}) \quad (\text{D.55})$$

$$\leq \sqrt{\mathbb{E}_{\mathbb{P}_{\beta^*}} [\psi^4(Y)] \cdot \mathbb{E}_{\mathbb{P}_{\beta^*}} [(X_j^2 - 1)^4]} \cdot \mathbb{P}_{\beta^*}(|X_j| \geq R \cdot \sqrt{\log n}),$$

where the above inequalities follows from the Cauchy-Schwartz inequality. Note that under the alternative hypothesis, we have  $X \sim N(0, I_d)$ . Then following from Assumption A.1 and the tail bound of standard Gaussian distribution in (C.54), it holds that

$$|\mathbb{E}_{\mathbb{P}_{\beta^*}} [\tilde{q}_{1,j}(Y, X) - q_{1,j}(Y, X)]|^2 \leq C' \cdot \exp(-R^2 \cdot \log n), \quad (\text{D.56})$$

1053 where  $C'$  is a positive absolute constant. Similar argument holds for  $q_{2,j}(Y, X)$ . Combining (D.54),  
 1054 (D.56), and a similar argument on  $q_{2,j}(Y, X)$ , we obtain that

$$\begin{aligned} & |\mathbb{E}_{\mathbb{P}_0} [q_{1,j}(Y, X) - \tilde{q}_{1,j}(Y, X)]| \vee |\mathbb{E}_{\mathbb{P}_{\beta^*}} [q_{1,j}(Y, X) - \tilde{q}_{1,j}(Y, X)]| \leq 1/n, \\ & |\mathbb{E}_{\mathbb{P}_0} [q_{2,j}(Y, X) - \tilde{q}_{2,j}(Y, X)]| \vee |\mathbb{E}_{\mathbb{P}_{\beta^*}} [q_{2,j}(Y, X) - \tilde{q}_{2,j}(Y, X)]| \leq 1/n, \end{aligned} \quad (\text{D.57})$$

1055 which holds for  $j \in [d]$ ,  $\beta^* \in \mathcal{H}(s, \gamma_n)$ , and sufficiently large  $n$  and constant  $R$ . Note that under the  
 1056 null hypothesis, it holds that  $X \sim N(0, I_d)$  and  $Y$  is independent of  $X$ . Therefore, following from  
 1057 (D.52), we obtain

$$\mathbb{E}_{\mathbb{P}_0} [\tilde{q}_{1,j}(Y, X)] = \mathbb{E}_{\mathbb{P}_0} [\tilde{q}_{2,j}(Y, X)] = 0. \quad (\text{D.58})$$

1058 Meanwhile, under the alternative hypothesis, it follows from (A.3) that

$$\begin{aligned} & \beta_j^{*2} - \mathbb{E}_{\mathbb{P}_{\beta^*}} [\tilde{q}_{1,j}(Y, X)] \\ & \leq \mathbb{E}_{\mathbb{P}_{\beta^*}} [\psi(Y) \cdot (X_j^2 - 1) \cdot \mathbb{1}\{|\psi(Y)| > (R \cdot \log n)^{1/\nu}\}] \\ & \leq \sqrt{\mathbb{E}_{\mathbb{P}_{\beta^*}} [\psi^2(Y) \cdot (X_j^2 - 1)^2]} \cdot \sqrt{\mathbb{P}_{\beta^*}(|\psi(Y)| > (R \cdot \log n)^{1/\nu})} \\ & \leq \left( \mathbb{E}_{\mathbb{P}_{\beta^*}} [\psi^4(Y)] \cdot \mathbb{E}_{\mathbb{P}_{\beta^*}} [(X_j^2 - 1)^4] \right)^{1/4} \cdot \sqrt{\mathbb{P}_{\beta^*}(|\psi(Y)| > (R \cdot \log n)^{1/\nu})}, \end{aligned} \quad (\text{D.59})$$

1059 where we denote by  $\beta_j^*$  the  $j$ -th entry of  $\beta^*$ , and the above inequalities follow from the Cauchy-  
 1060 Schwartz inequality. Then following from Assumption A.1 and the fact that  $X \sim N(0, I_d)$  under the  
 1061 alternative hypothesis, we obtain that

$$\beta_j^{*2} - \mathbb{E}_{\mathbb{P}_{\beta^*}} [\tilde{q}_{1,j}(Y, X)] \leq C \cdot \exp(-R/2 \cdot \log n), \quad (\text{D.60})$$

1062 where  $C$  is a positive absolute constant. Note that  $\|\beta^*\|_2^2 = s\rho^2$  and  $\|\beta^*\|_0 = s$ . Therefore, we  
 1063 obtain that

$$\sup_{j \in [d]} |\beta_j^*| \geq \rho. \quad (\text{D.61})$$

1064 Following from (D.60) and (D.61), if it holds that  $s\rho^2/\sigma^2 = \Omega(\sqrt{s^2 \log d/n})$ , then for sufficiently  
 1065 large  $n$  and constant  $R$ , we obtain that  $\rho^2/4 > 1/n$  and

$$\sup_{j \in [d]} \mathbb{E}_{\mathbb{P}_{\beta^*}} [\tilde{q}_{1,j}(Y, X)] \geq 3\rho^2/4. \quad (\text{D.62})$$

1066 Similar argument holds for  $\tilde{q}_{2,j}(Y, X)$ . Following from (A.4), we obtain that under the alternative  
 1067 hypothesis, it holds that

$$\alpha\beta_j^* - \mathbb{E}_{\mathbb{P}_{\beta^*}} [\tilde{q}_{2,j}(Y, X)] = \mathbb{E}_{\mathbb{P}_{\beta^*}} [\psi(Y) \cdot X_j \cdot \mathbb{1}\{|\psi(Y)| > (R \cdot \log n)^{1/\nu}\}]. \quad (\text{D.63})$$

1068 Meanwhile, it follows from the Cauchy-Schwartz inequality that

$$\begin{aligned} & \left| \mathbb{E}_{\mathbb{P}_{\beta^*}} [Y \cdot X_j \cdot \mathbb{1}\{|Y| > (R \cdot \log n)^{1/\nu}\}] \right|^2 \leq \mathbb{E}_{\mathbb{P}_{\beta^*}} [Y^2 \cdot X_j^2] \cdot \mathbb{P}_{\beta^*}(|Y| > (R \cdot \log n)^{1/\nu}) \\ & \leq \sqrt{\mathbb{E}_{\mathbb{P}_{\beta^*}} [Y^4] \cdot \mathbb{E}_{\mathbb{P}_{\beta^*}} [X_j^4]} \cdot \mathbb{P}_{\beta^*}(|Y| > (R \cdot \log n)^{1/\nu}) \\ & \leq C' \cdot \exp(-R \log n), \end{aligned} \quad (\text{D.64})$$

1069 where the last inequality follows from Assumption A.1 and the fact that  $X \sim N(0, I_d)$  under  
 1070 the alternative hypothesis. Combining (D.61), (D.63), and (D.64), we obtain that for  $s\rho^2/\sigma^2 =$   
 1071  $\Omega(1/\alpha^2 \cdot s \log d/n)$ , it holds for sufficiently large  $n$  and constant  $R$  that  $\alpha\rho/4 > 1/n$  and

$$\sup_{j \in [d]} |\mathbb{E}_{\mathbb{P}_{\beta^*}} [\tilde{q}_{2,j}(Y, X)]| \geq 3\alpha\rho/4. \quad (\text{D.65})$$

1072 Combining (D.57), (D.62), and (D.65), we obtain that for sufficiently large  $n$  and constant  $R$ , it holds  
 1073 that

$$\sup_{j \in [d]} \mathbb{E}_{\mathbb{P}_0} [q_{1,j}(Y, X)] \leq 1/n, \quad \sup_{j \in [d]} \mathbb{E}_{\mathbb{P}_0} [q_{1,j}(Y, X)] \leq 1/n. \quad (\text{D.66})$$

1074 Moreover, for sufficiently large  $n$  and constant  $R$ , it holds that

$$\begin{aligned} & \sup_{j \in [d]} \mathbb{E}_{\mathbb{P}_{\beta^*}} [q_{1,j}(Y, X)] \geq \rho^2/2 \text{ if } s\rho^2/\sigma^2 = \Omega(\sqrt{s \log d/n}), \\ & \sup_{j \in [d]} \mathbb{E}_{\mathbb{P}_{\beta^*}} [q_{2,j}(Y, X)] \geq \alpha\rho/2 \text{ if } s\rho^2/\sigma^2 = \Omega(1/\alpha^2 \cdot s \log d/n), \end{aligned} \quad (\text{D.67})$$

1075 which concludes the proof of Lemma D.4.  $\square$
